# Supplementary material for: Solvent-free synthesis of 5-(aryl/alkyl)amino-1,2,4-triazines and α-arylamino-2,2′-bipyridines with greener prospects
Source: Royal Society of Chemistry journal article supplement (doi:10.1039/c6ra26305d), 2017-01-01

## Supporting Information

### **Solvent-free synthesis of 5-(aryl/alkyl)amino-1,2,4-triazines and $\alpha$ -arylamino-2,2'-bipyridines with a greener prospect**

Dmitry S. Kopchuk, Nikolay V. Chepchugov, Igor S. Kovalev, Sougata Santra,\* Matiur Rahman, Kousik Giri, Grigory V. Zyryanov, Adinath Majee,\* Valery N. Charushin, Oleg N. Chupakhin

#### Table of Contents

|                                                                      |       |      |
|----------------------------------------------------------------------|-------|------|
| Structure Determination (X-ray crystallographic data for <b>3k</b> ) | ..... | 2    |
| E-factor Calculations                                                | ..... | 3    |
| <sup>1</sup> H & <sup>13</sup> C NMR Spectra of all compounds        | ..... | 4-41 |

## Structure Determination (X-ray crystallographic data for 3k)

The white crystals of **3k** were obtained by crystallization from a solution in ethanol after purification by column chromatography. Chemical formula C<sub>19</sub>H<sub>18</sub>N<sub>4</sub>O.

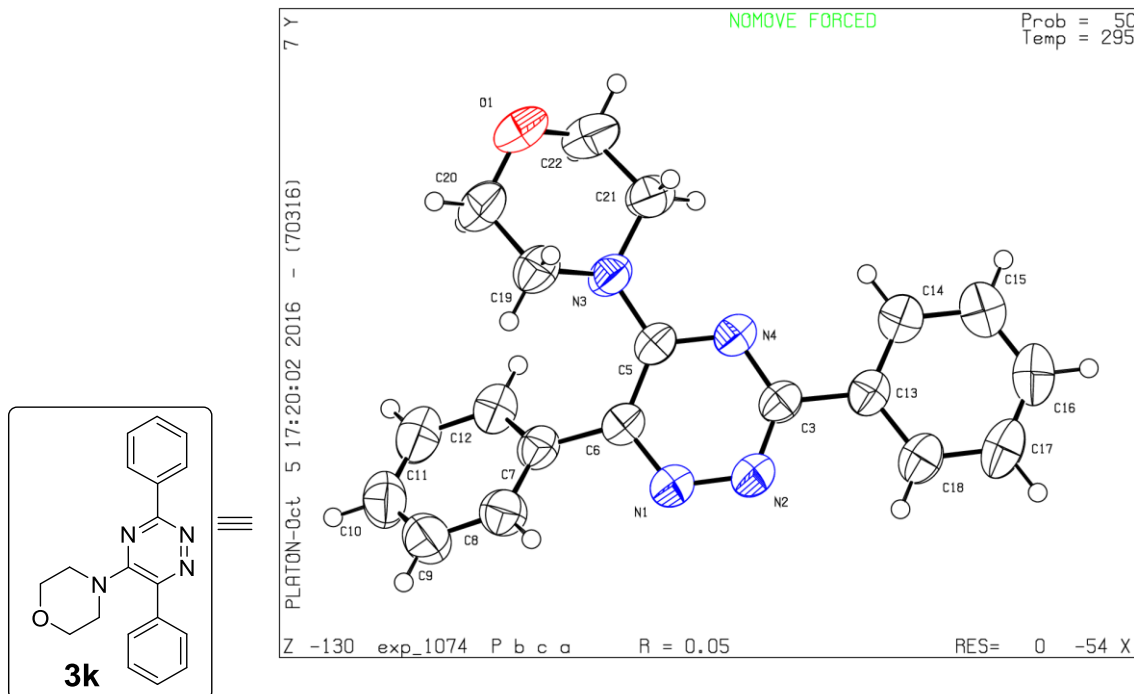

ORTEP (with 50% probability) diagram for the structure 5-(Morpholine-4-yl)-3,6-diphenyl-1,2,4-triazine (**3k**).

|                             |                                                  |          |
|-----------------------------|--------------------------------------------------|----------|
| <b>Wavelength</b>           | 0.71070 Å                                        |          |
| <b>Formula</b>              | C <sub>19</sub> H <sub>18</sub> N <sub>4</sub> O |          |
| <b>Crystal system</b>       | Orthorhombic                                     |          |
| <b>Space group</b>          | P b c a                                          |          |
| <b>Unit cell dimensions</b> | a = 11.5790(8) Å                                 | α = 90 ° |
|                             | b = 9.4791(5) Å                                  | β = 90 ° |
|                             | c = 30.0335(19) Å                                | γ = 90 ° |
| <b>Volume</b>               | 3296.43 Å <sup>3</sup>                           |          |
| <b>Z</b>                    | 8                                                |          |
| <b>R-factor (%)</b>         | 5.14                                             |          |

The crystallographic data have been deposited with the Cambridge Crystallographic Data Centres supplementary publication with a CCDC reference number **CCDC 1505314**.

### E-factor calculations for compounds 3:

$$\text{For } \mathbf{3a}: E = [0.137 \text{ g (1a)} + 0.047 \text{ g (2a)} - 0.160 \text{ g (product} \times \text{yield)}] / 0.160 \text{ g} = 0.15$$

$$\text{For } \mathbf{3b}: E = [0.130 \text{ g (1b)} + 0.047 \text{ g (2a)} - 0.151 \text{ g (product} \times \text{yield)}] / 0.151 \text{ g} = 0.17$$

$$\text{For } \mathbf{3c}: E = [0.137 \text{ g (1a)} + 0.082 \text{ g (2b)} - 0.190 \text{ g (product} \times \text{yield)}] / 0.190 \text{ g} = 0.15$$

$$\text{For } \mathbf{3d}: E = [0.137 \text{ g (1a)} + 0.069 \text{ g (2c)} - 0.179 \text{ g (product} \times \text{yield)}] / 0.179 \text{ g} = 0.15$$

$$\text{For } \mathbf{3e}: E = [0.137 \text{ g (1a)} + 0.062 \text{ g (2d)} - 0.175 \text{ g (product} \times \text{yield)}] / 0.175 \text{ g} = 0.14$$

$$\text{For } \mathbf{3f}: E = [0.130 \text{ g (1b)} + 0.062 \text{ g (2e)} - 0.169 \text{ g (product} \times \text{yield)}] / 0.169 \text{ g} = 0.14$$

$$\text{For } \mathbf{3g}^a: E = [0.131 \text{ g (1c)} + 0.047 \text{ g (2a)} + 8.65 \text{ g (Toluene)} - 0.150 \text{ g (product} \times \text{yield)}] / 0.150 \text{ g} = 58$$

$$\text{For } \mathbf{3h}^a: E = [0.139 \text{ g (1d)} + 0.047 \text{ g (2a)} + 8.65 \text{ g (Toluene)} - 0.150 \text{ g (product} \times \text{yield)}] / 0.150 \text{ g} = 58$$

$$\text{For } \mathbf{3i}: E = [0.129 \text{ g (1e)} + 0.047 \text{ g (2a)} - 0.160 \text{ g (product} \times \text{yield)}] / 0.160 \text{ g} = 0.10$$

$$\text{For } \mathbf{3j}^a: E = [0.129 \text{ g (1e)} + 0.044 \text{ g (2f)} + 8.65 \text{ g (Toluene)} - 0.146 \text{ g (product} \times \text{yield)}] / 0.146 \text{ g} = 59$$

$$\text{For } \mathbf{3k}^a: E = [0.129 \text{ g (1e)} + 0.051 \text{ g (2g)} + 8.65 \text{ g (Toluene)} - 0.143 \text{ g (product} \times \text{yield)}] / 0.143 \text{ g} = 61$$

$$\text{For } \mathbf{3l}: E = [0.129 \text{ g (1e)} + 0.036 \text{ g (2h)} - 0.137 \text{ g (product} \times \text{yield)}] / 0.137 \text{ g} = 0.20$$

$$\text{For } \mathbf{3m}: E = [0.129 \text{ g (1e)} + 0.050 \text{ g (2i)} - 0.149 \text{ g (product} \times \text{yield)}] / 0.149 \text{ g} = 0.20$$

$$\text{For } \mathbf{3n}^a: E = [0.105 \text{ g (1f)} + 0.047 \text{ g (2a)} + 8.65 \text{ g (Toluene)} - 0.120 \text{ g (product} \times \text{yield)}] / 0.120 \text{ g} = 72$$

$$\text{For } \mathbf{3o}^a: E = [0.137 \text{ g (1a)} + 0.085 \text{ g (2j)} + 8.65 \text{ g (Toluene)} - 0.053 \text{ g (product} \times \text{yield)}] / 0.053 \text{ g} = 166$$

<sup>a</sup>Flash chromatography was done using toluene as eluent.

### E-factor calculations for compounds 4:<sup>a</sup>

$$\text{For } \mathbf{4a}: E = [0.095 \text{ g (3a)} + 0.064 \text{ g (1-morpholinocyclopentene)} + 3.945 \text{ g (Ethanol)} - 0.100 \text{ g (product} \times \text{yield)}] / 0.100 \text{ g} = 40. \text{ (0.28 mmol reaction was carried out)}$$

$$\text{For } \mathbf{4b}: E = [0.084 \text{ g (3b)} + 0.060 \text{ g (1-morpholinocyclopentene)} + 3.945 \text{ g (Ethanol)} - 0.096 \text{ g (product} \times \text{yield)}] / 0.096 \text{ g} = 41. \text{ (0.26 mmol reaction was carried out.)}$$

$$\text{For } \mathbf{4c}: E = [0.092 \text{ g (3e)} + 0.057 \text{ g (1-morpholinocyclopentene)} + 3.945 \text{ g (Ethanol)} - 0.100 \text{ g (product} \times \text{yield)}] / 0.100 \text{ g} = 40. \text{ (0.25 mmol reaction was carried out)}$$

<sup>a</sup> 5 mL ethanol was used for recrystallization.

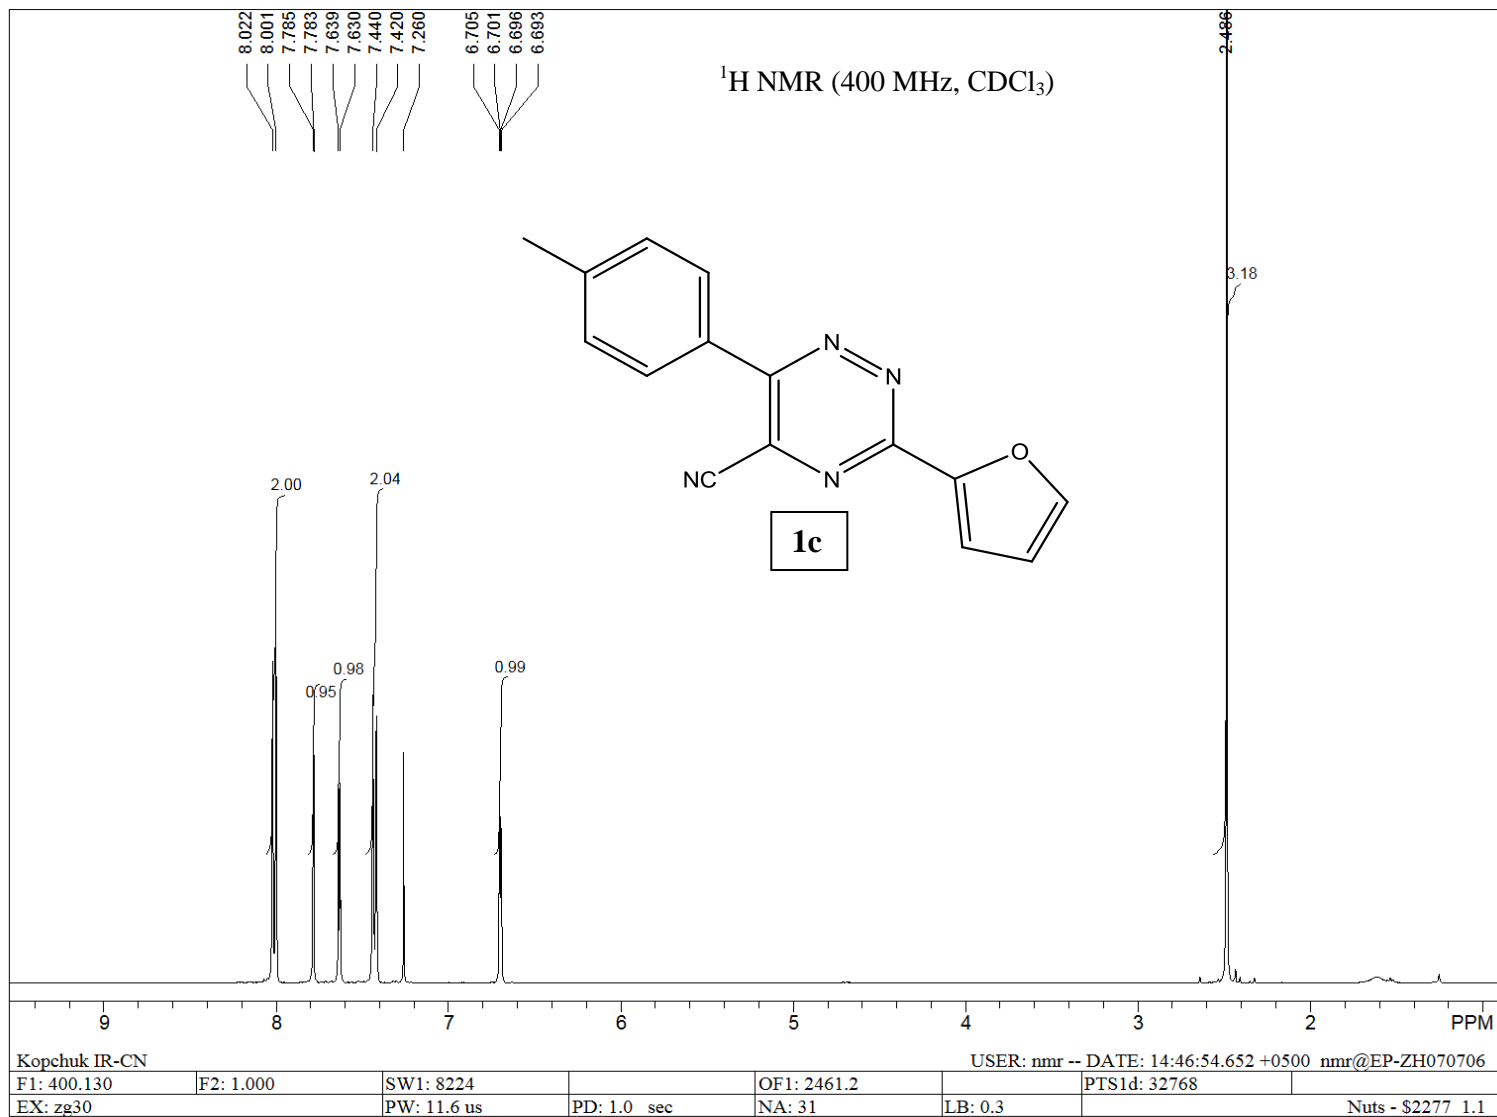

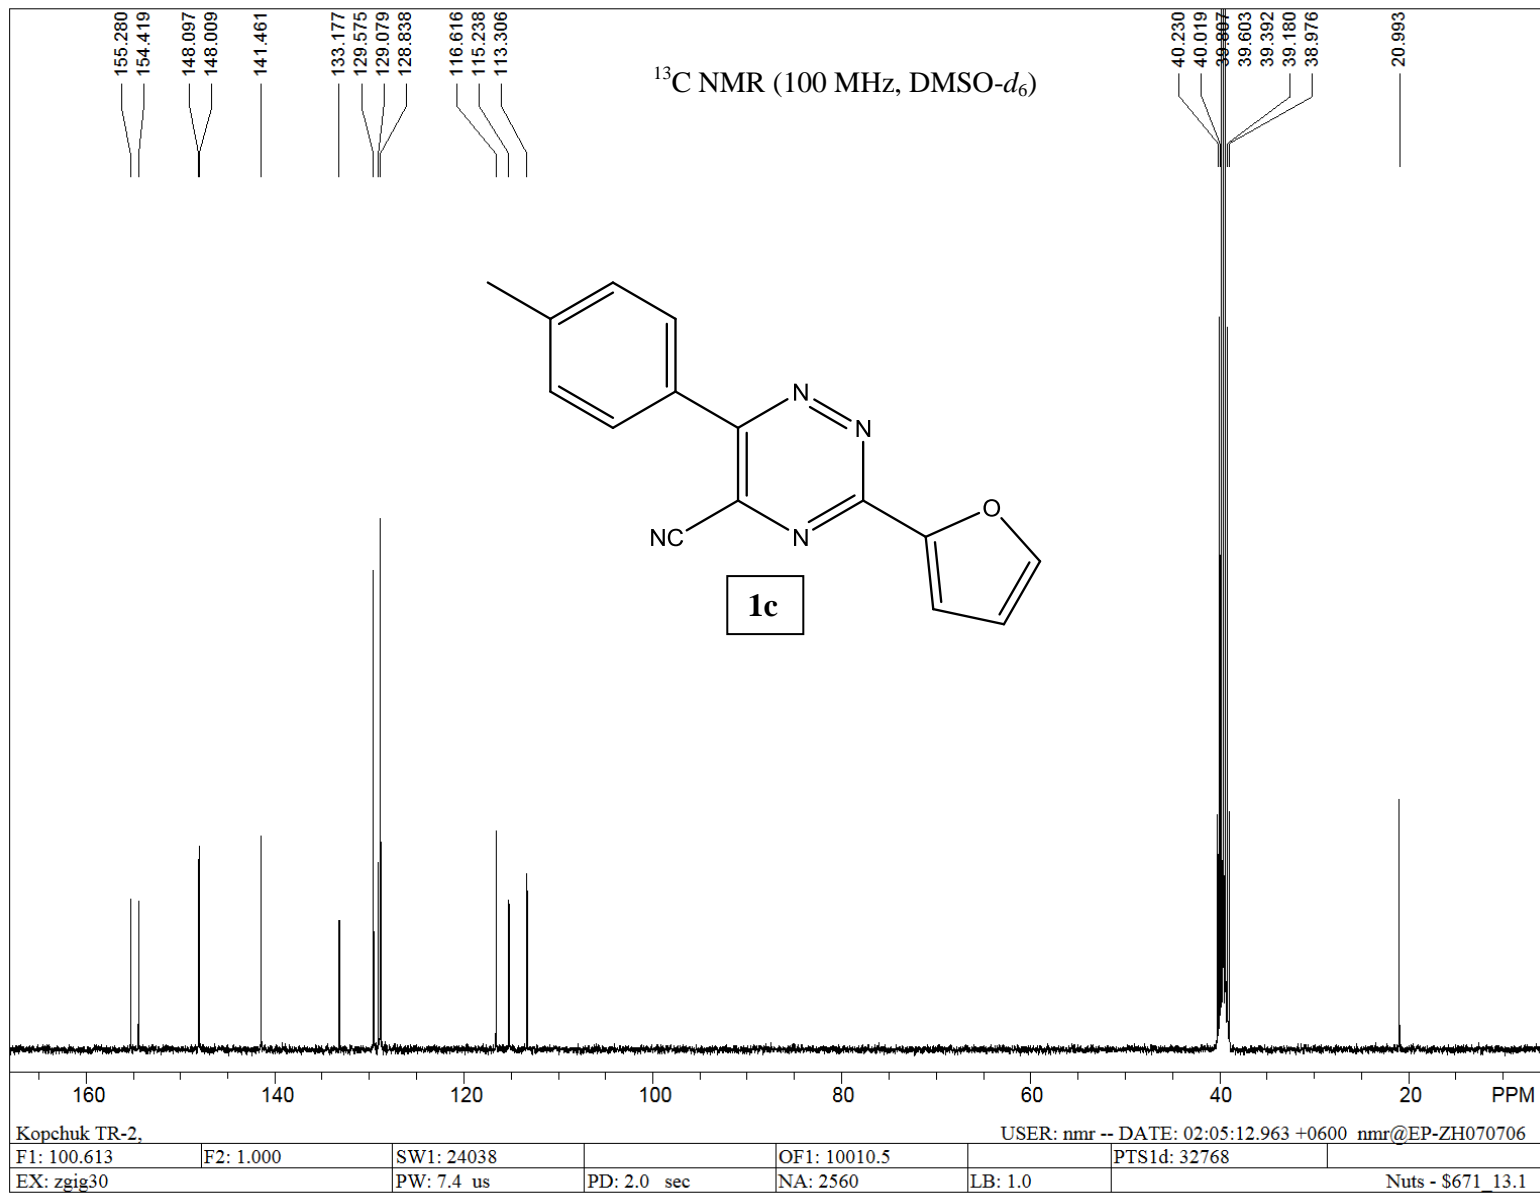

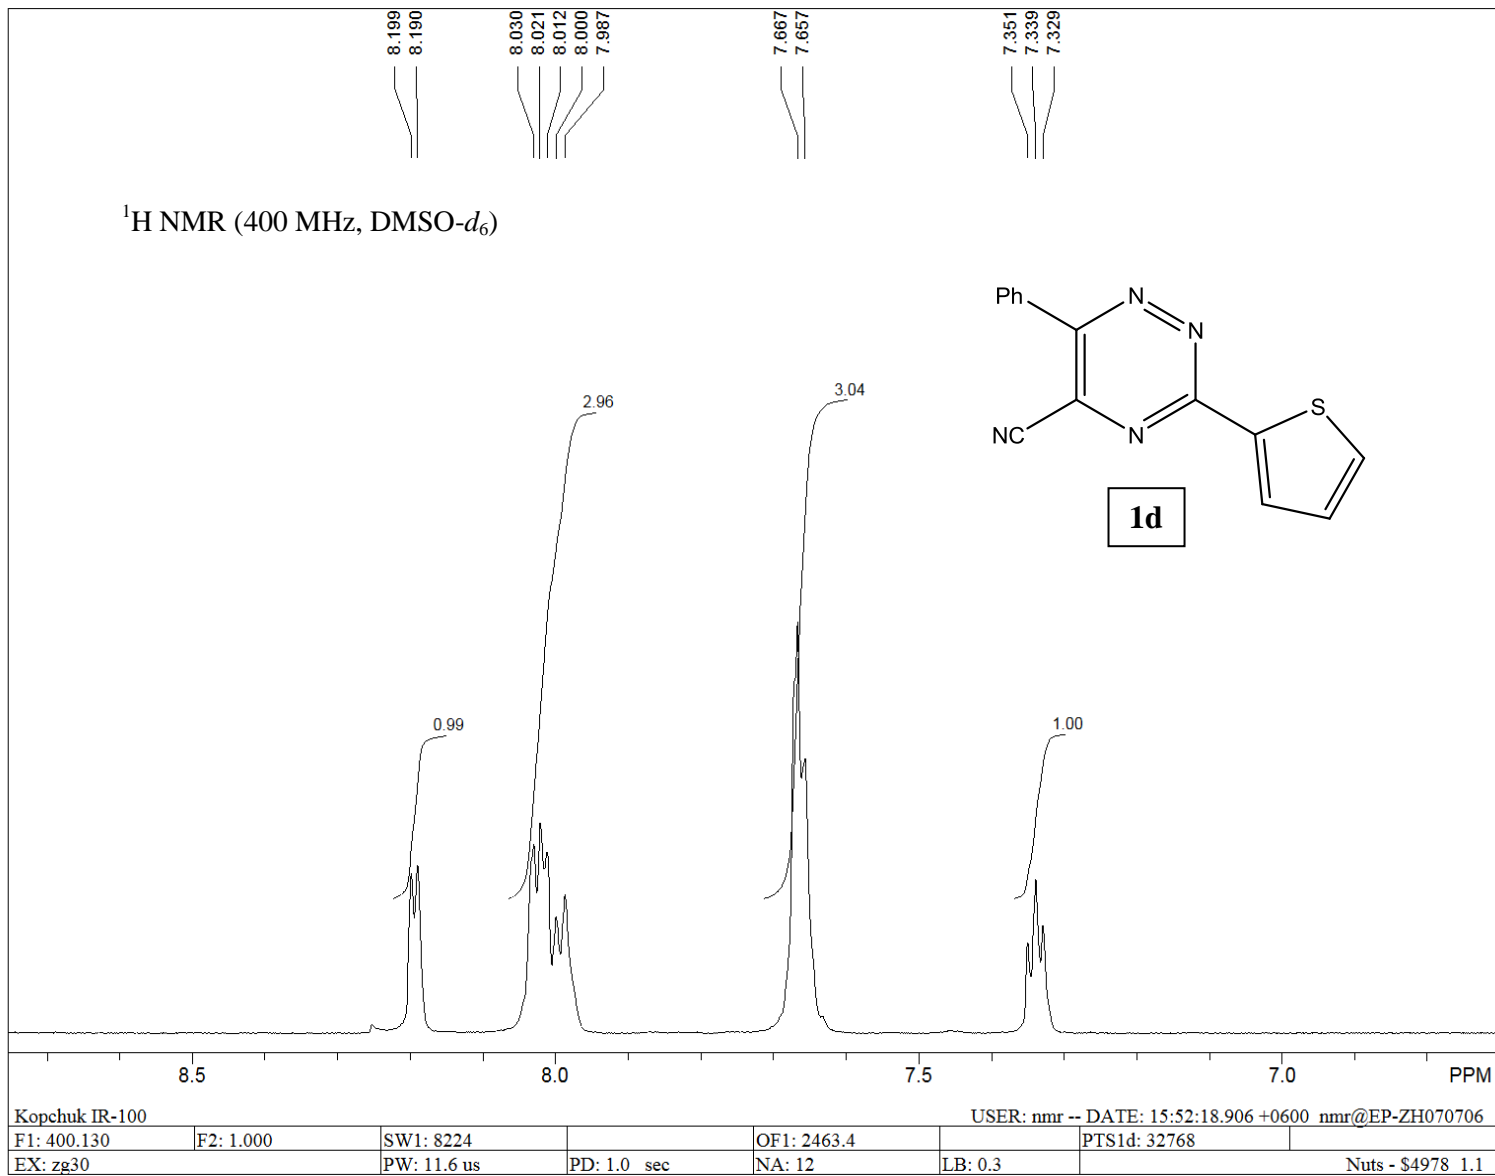

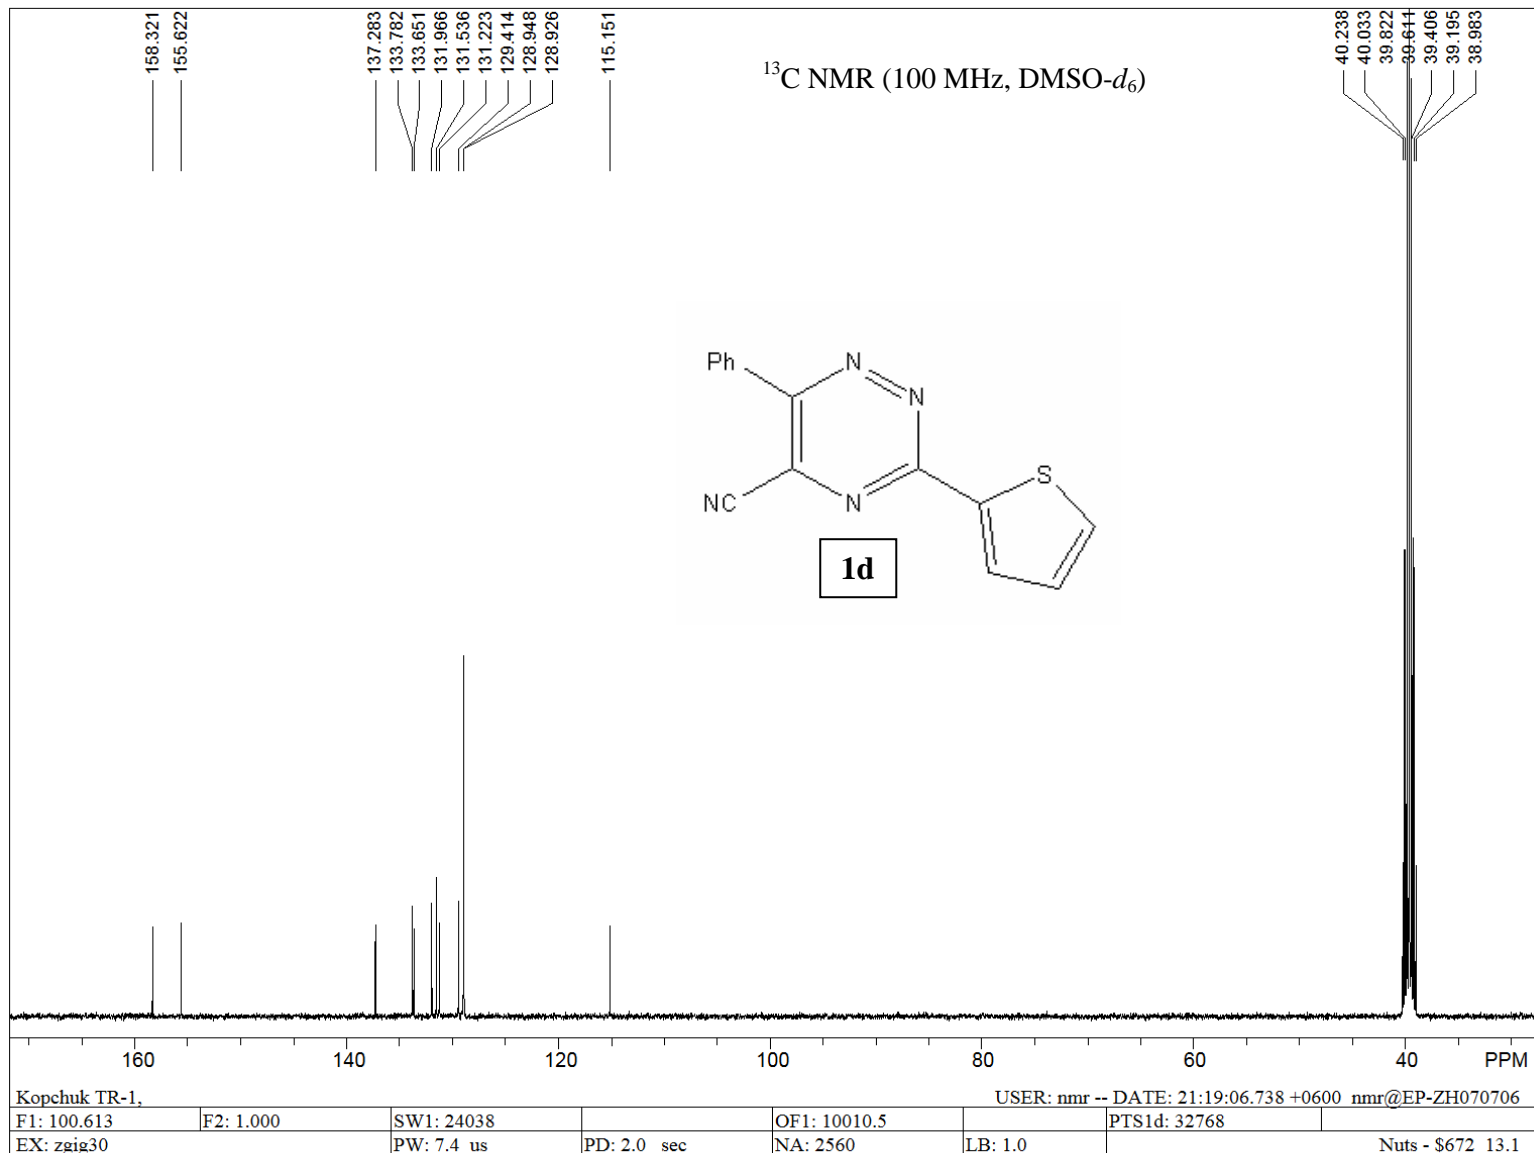

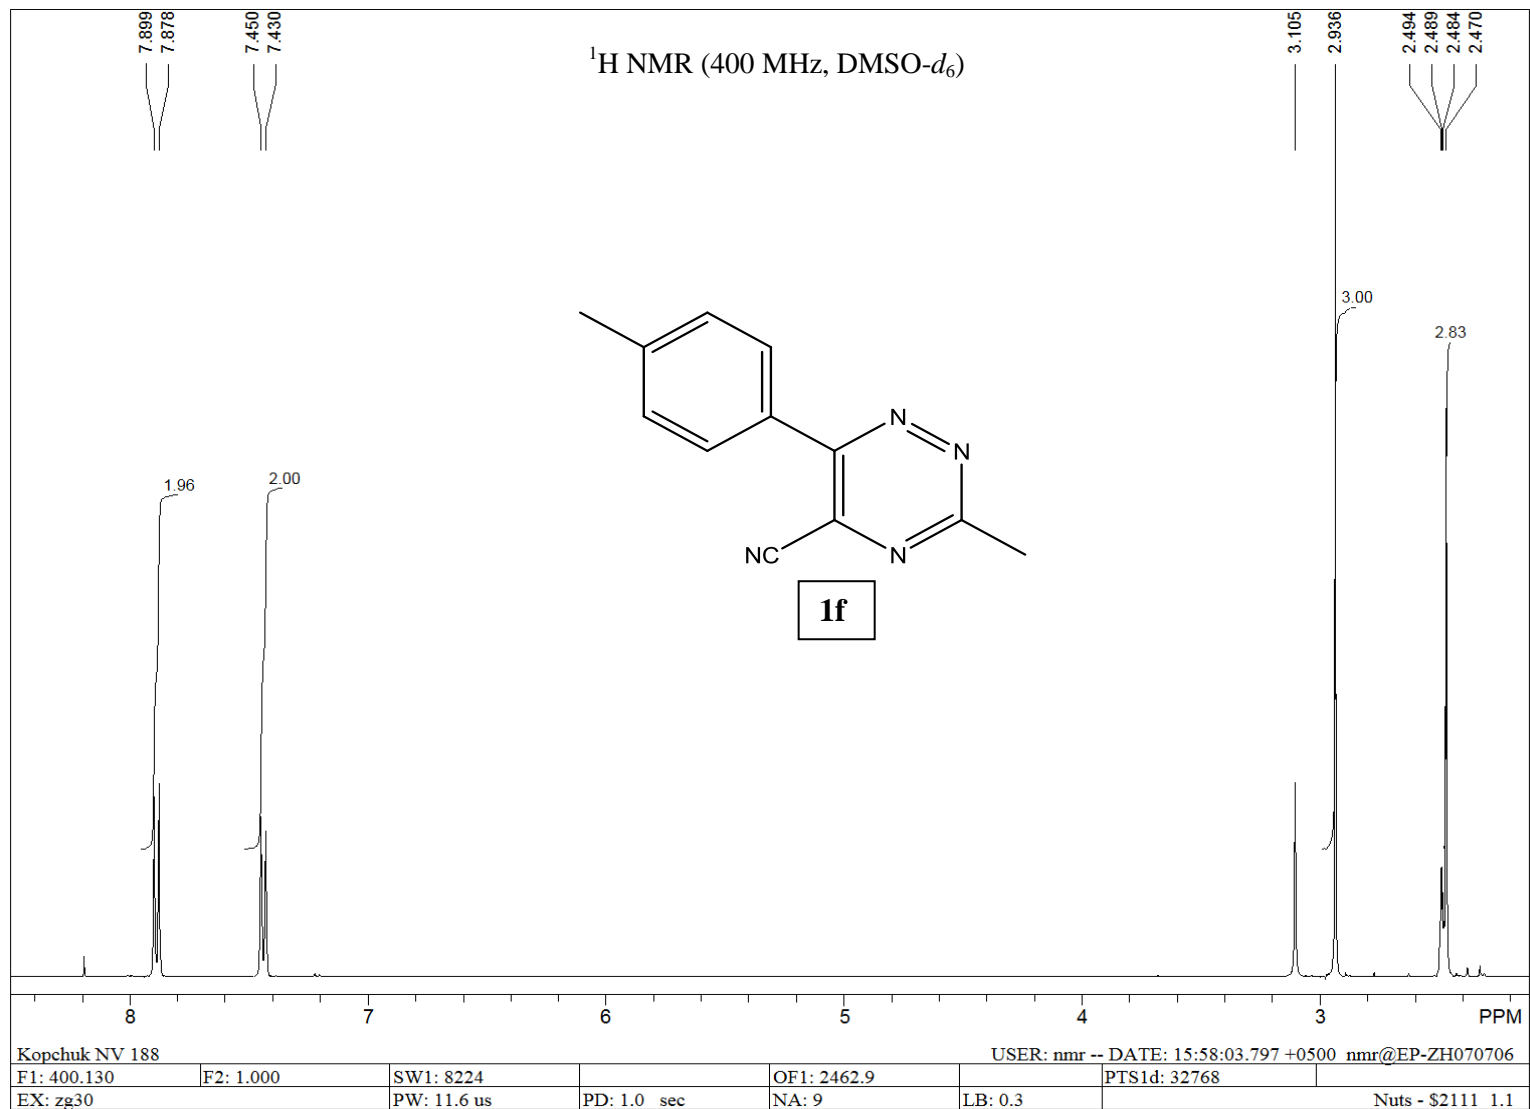



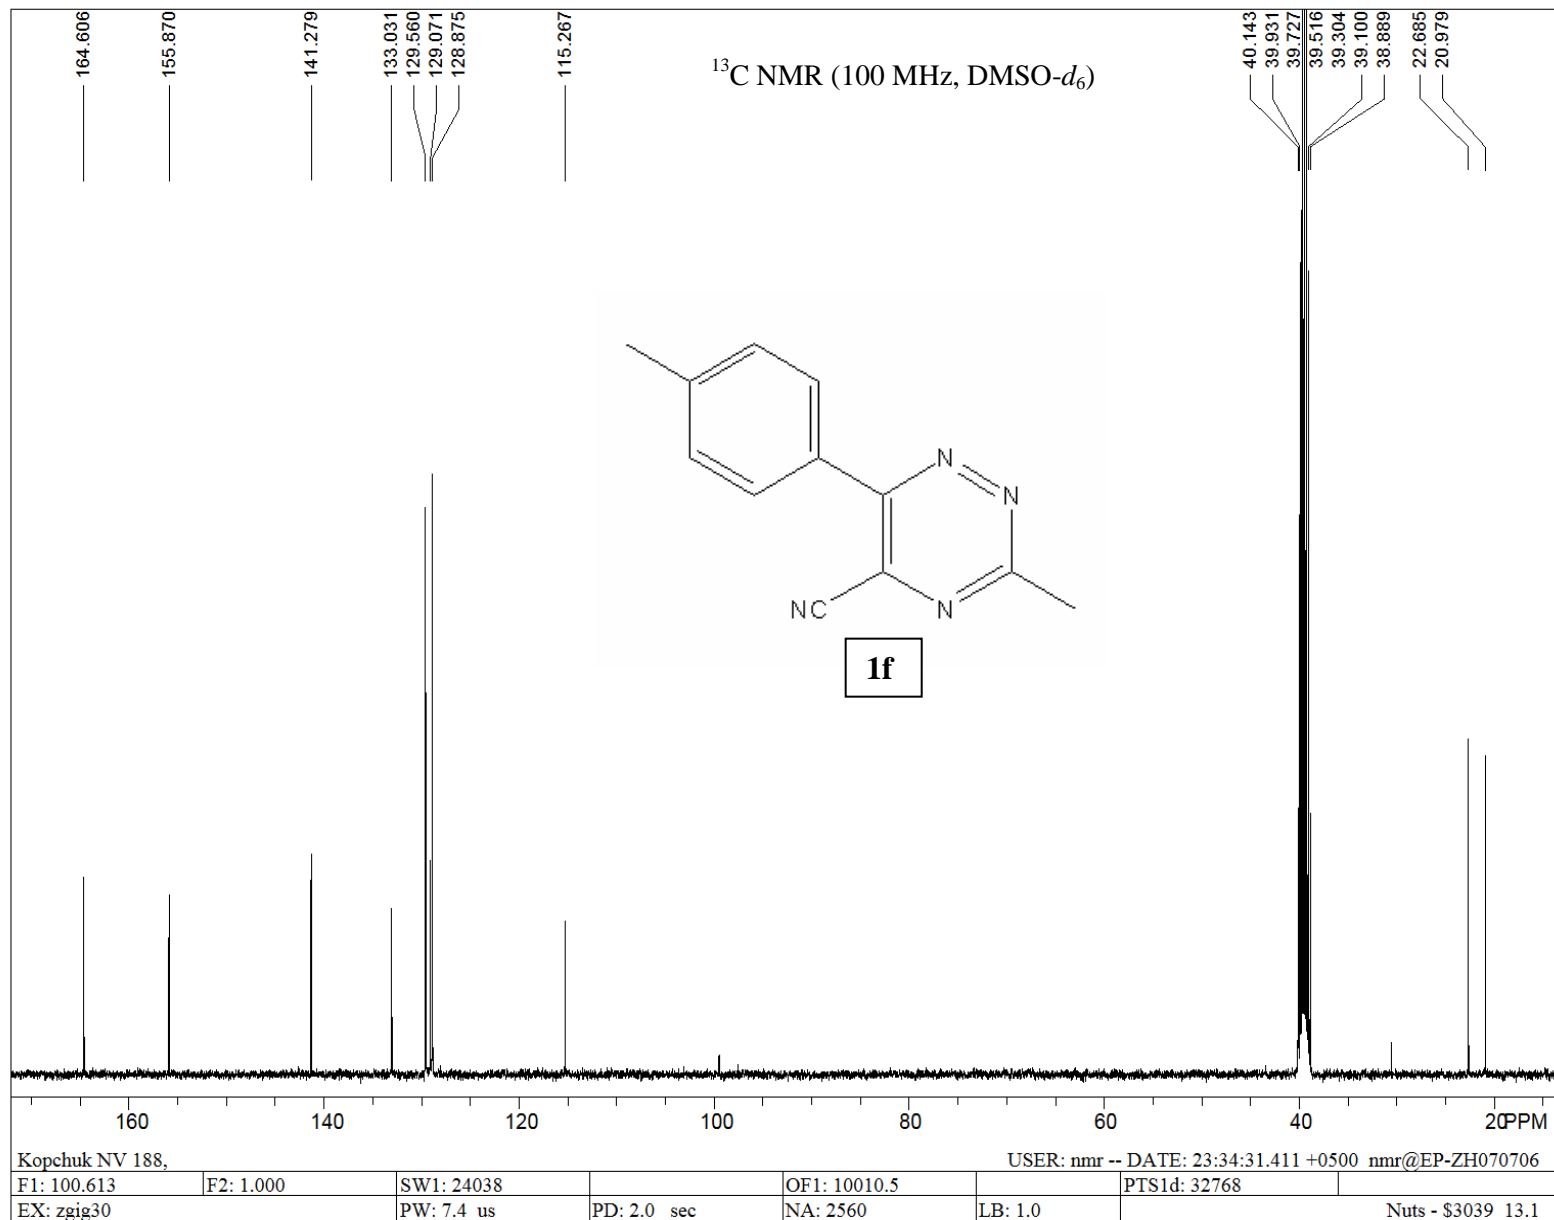

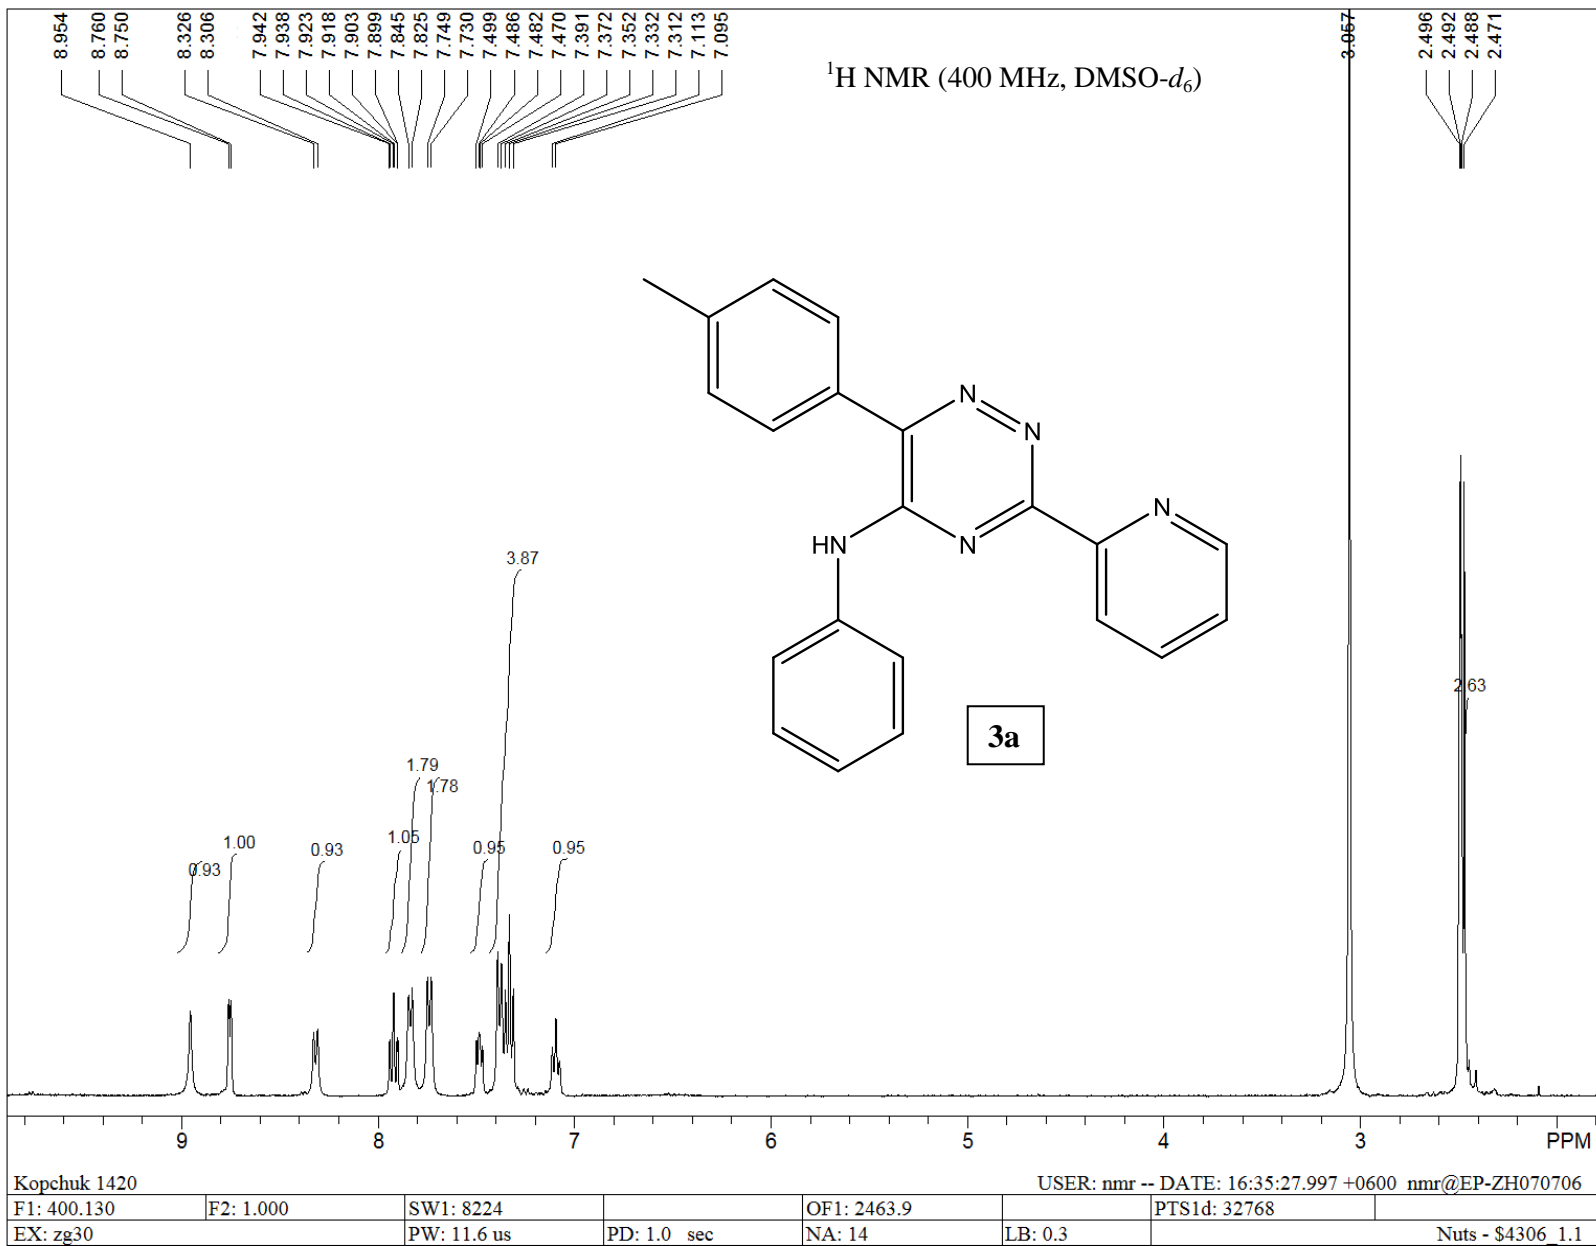

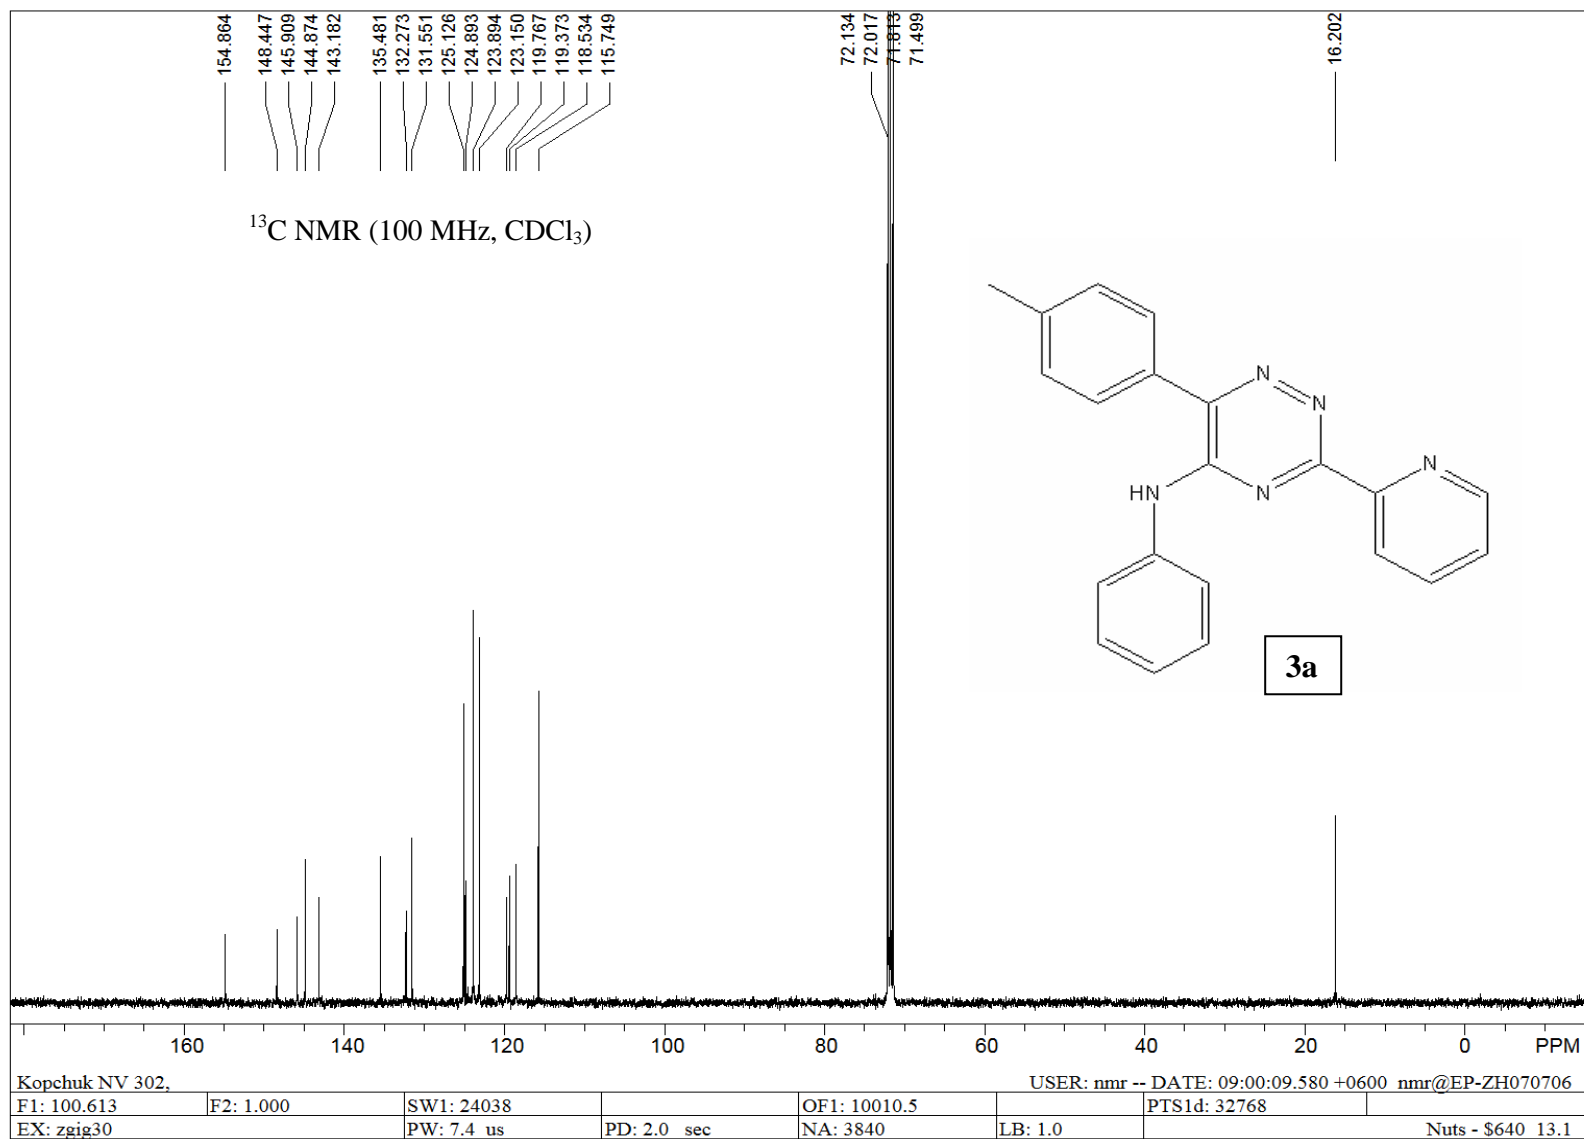

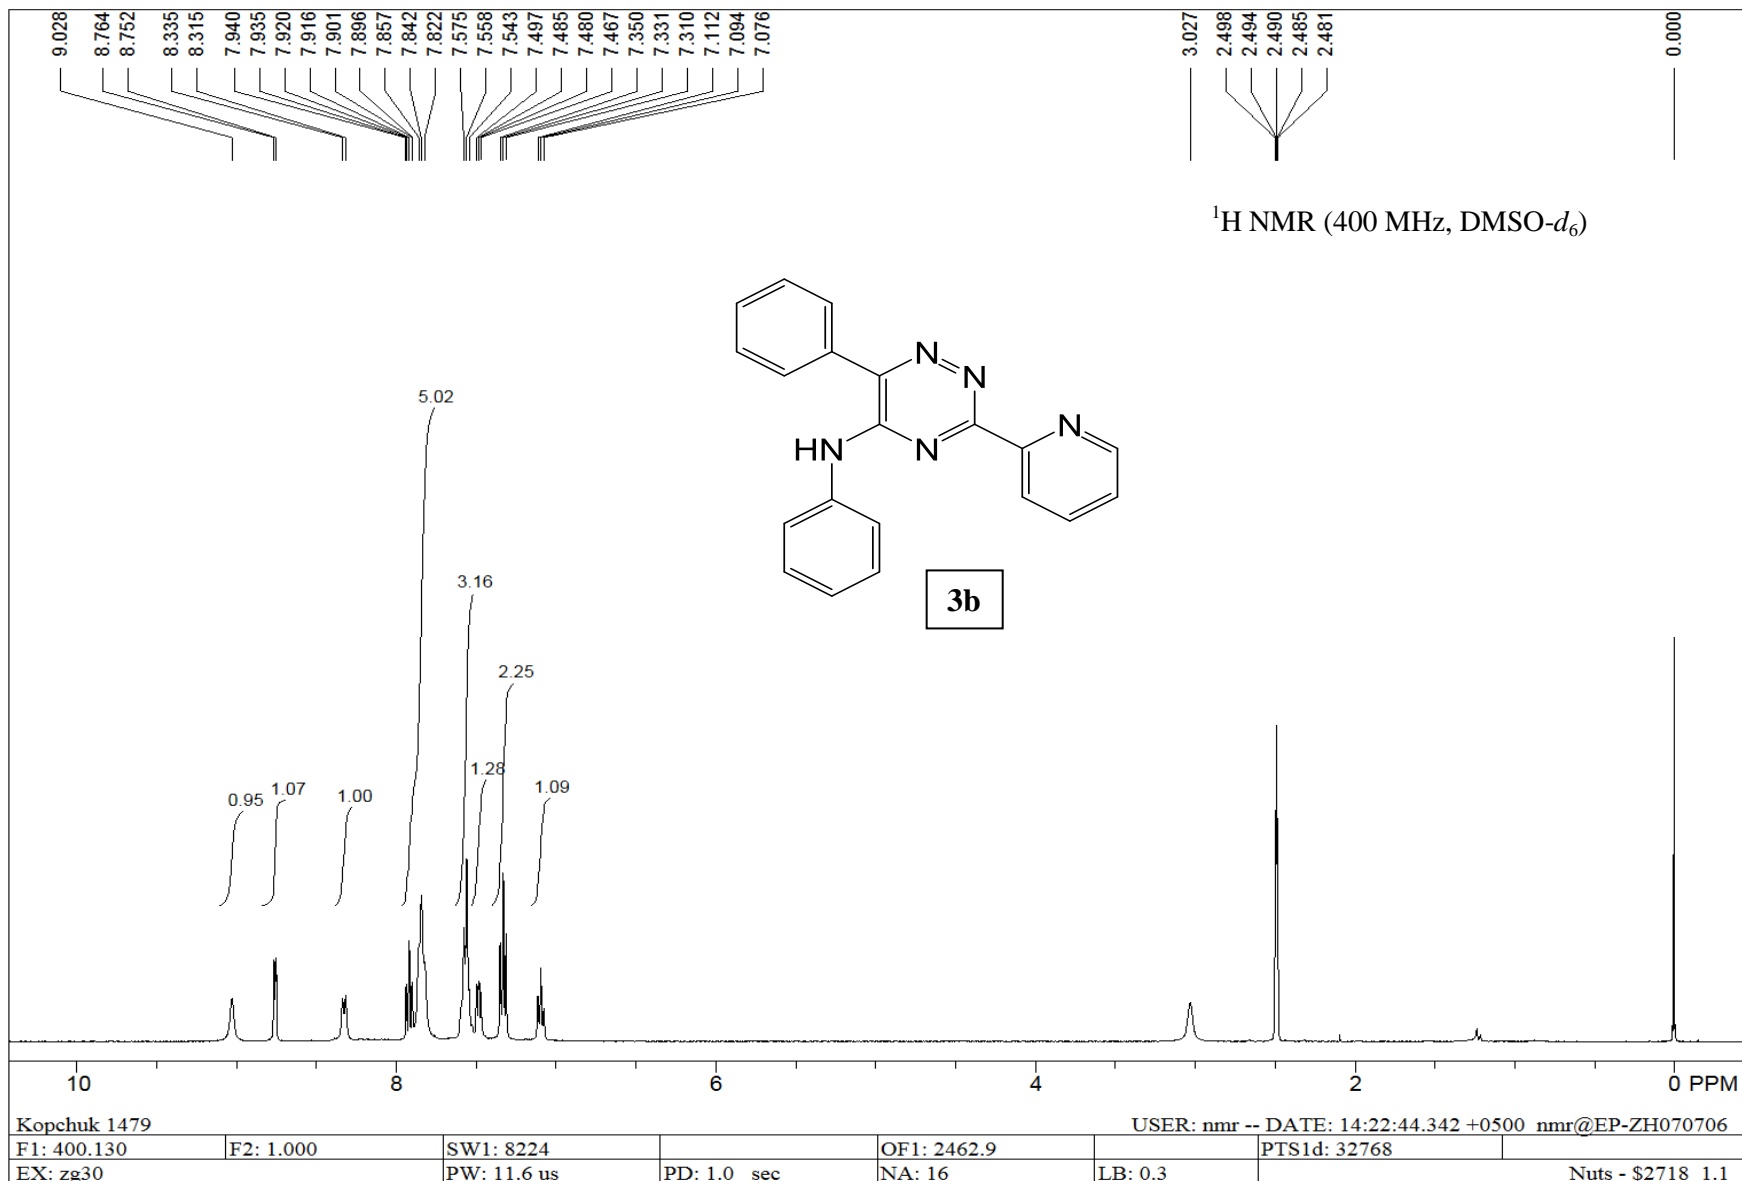

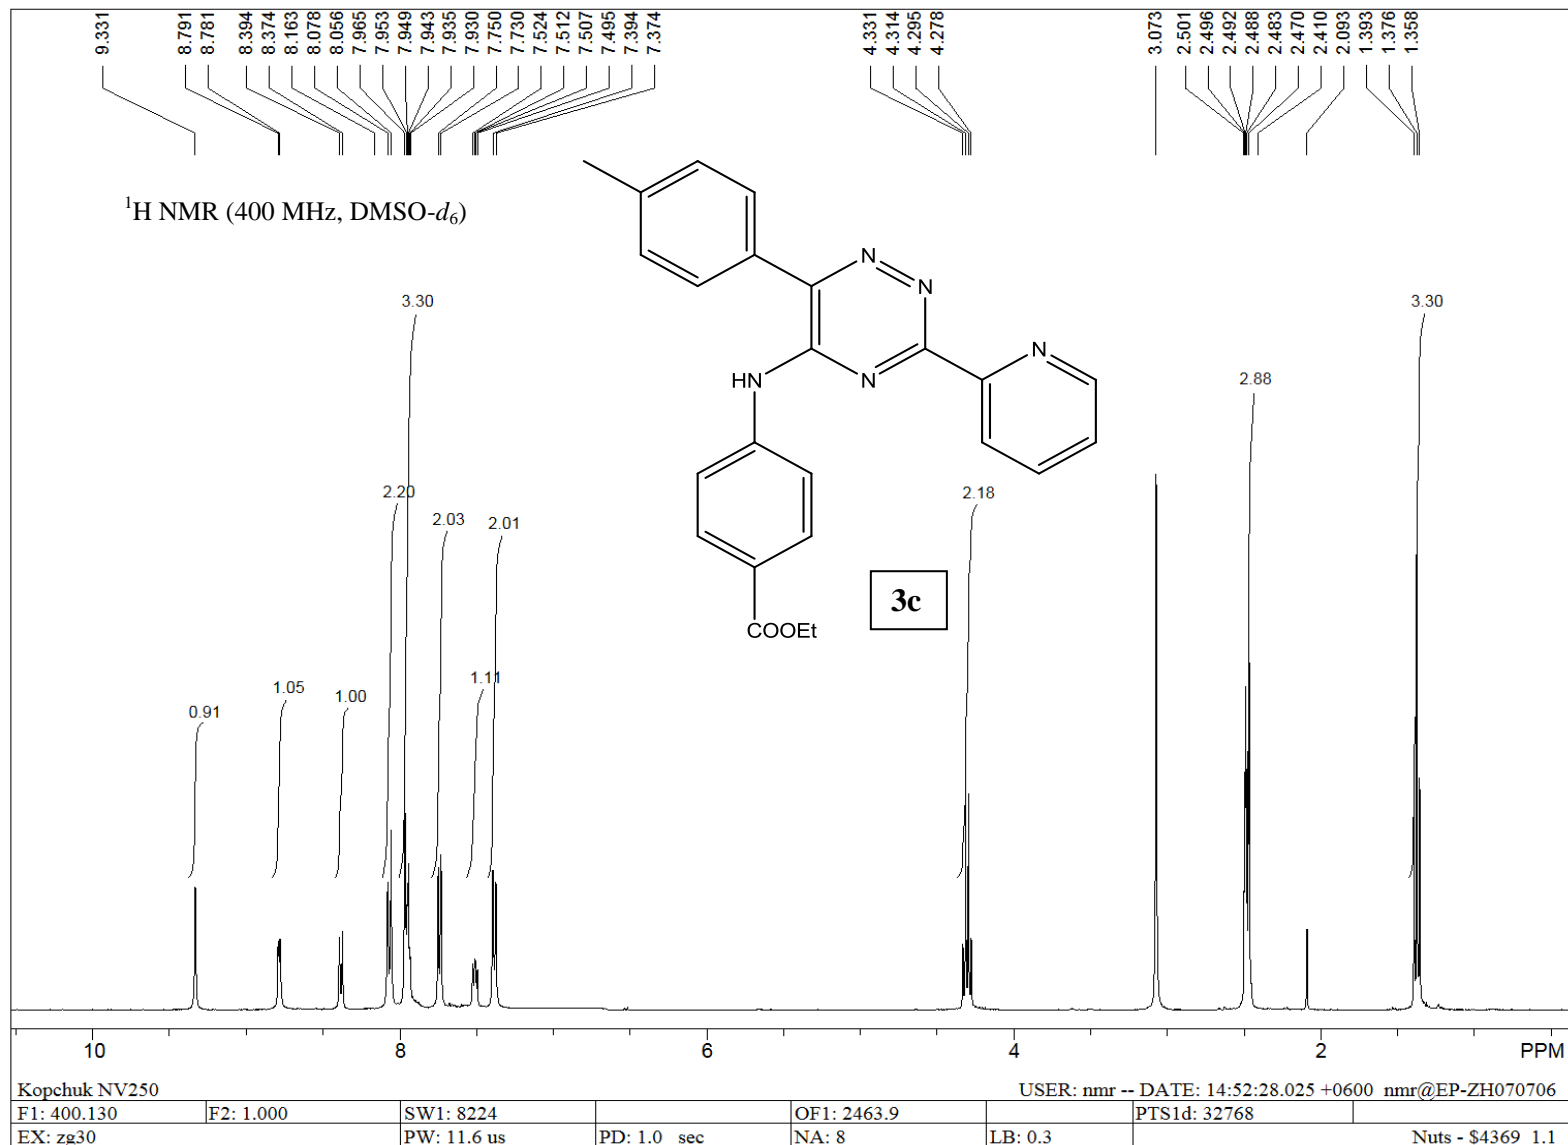

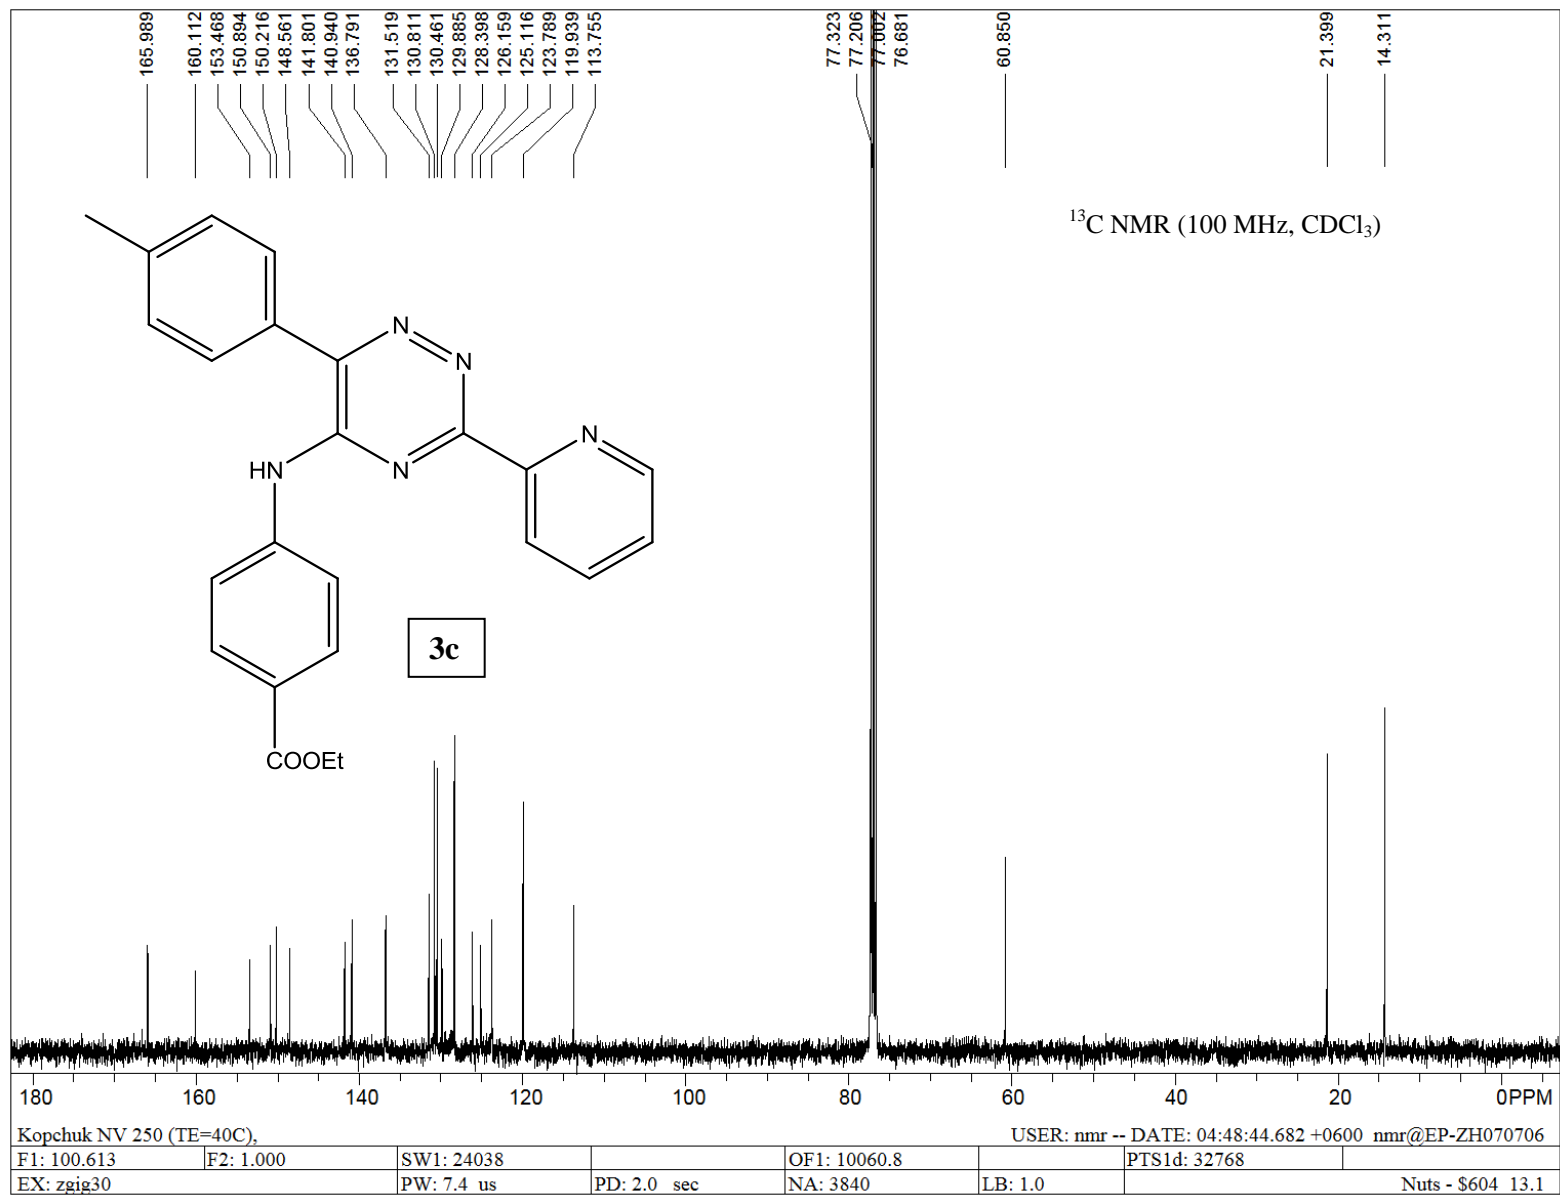

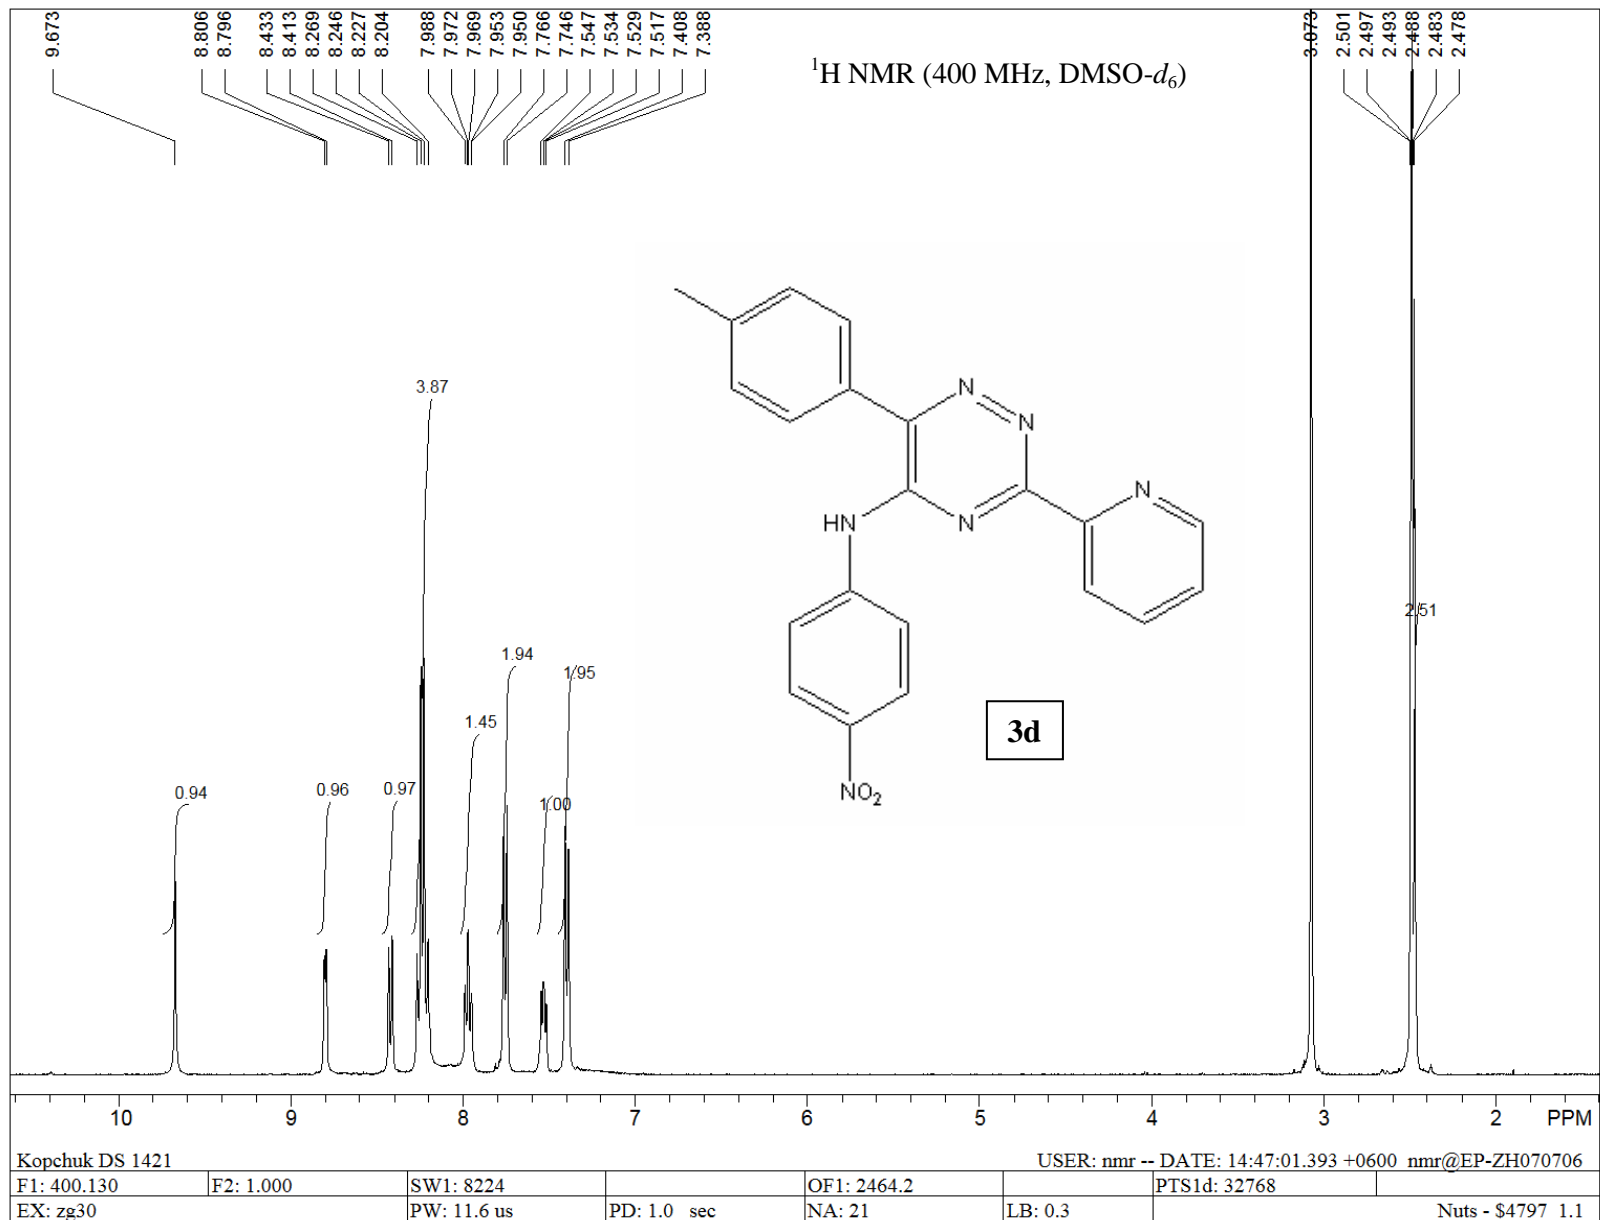

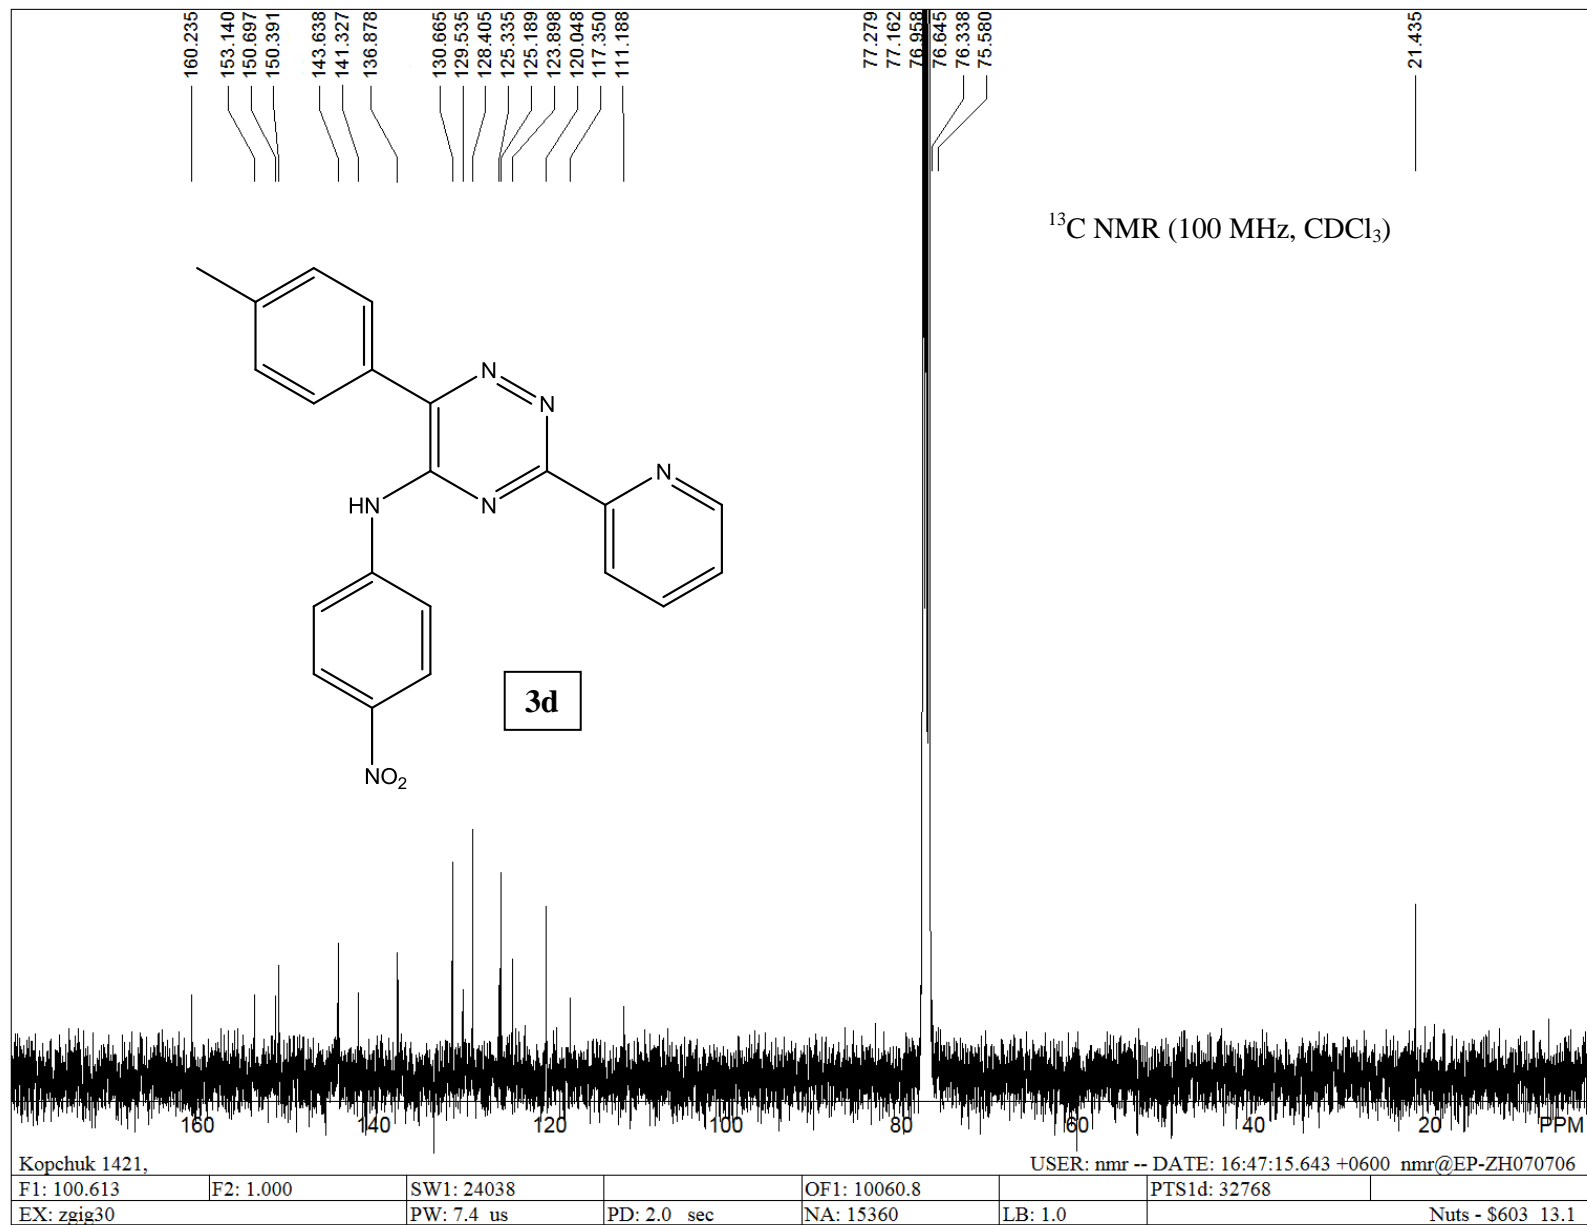



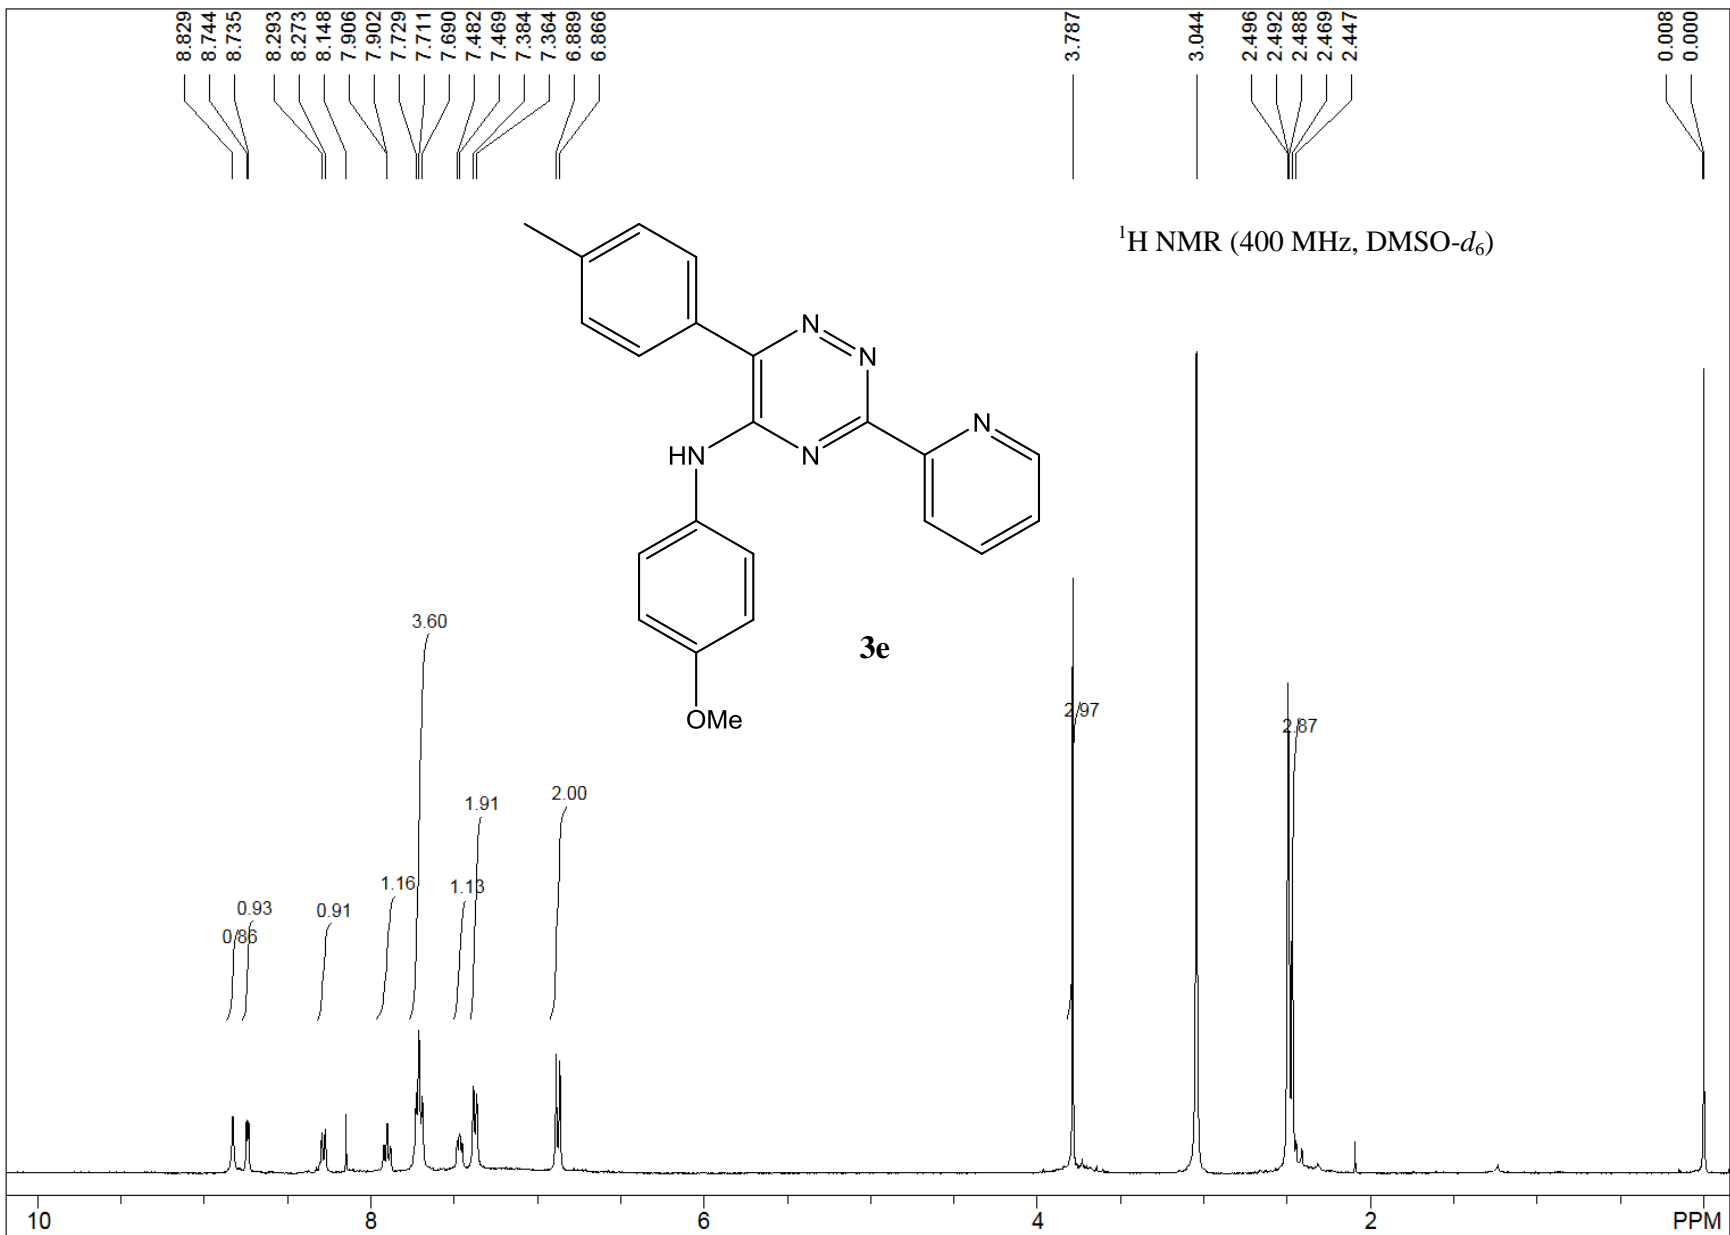

|                |             |             |             |                                                       |                   |  |  |
|----------------|-------------|-------------|-------------|-------------------------------------------------------|-------------------|--|--|
| Kopchuk NV 267 |             |             |             | USER: nmr -- DATE: 15:32:38.595 +0600 nmr@EP-ZH070706 |                   |  |  |
| F1: 400.130    | F2: 1.000   | SW1: 8224   | OF1: 2463.9 | PTS1d: 32768                                          |                   |  |  |
| EX: zg30       | PW: 11.6 us | PD: 1.0 sec | NA: 32      | LB: 0.3                                               | Nuts - \$4878 1.1 |  |  |

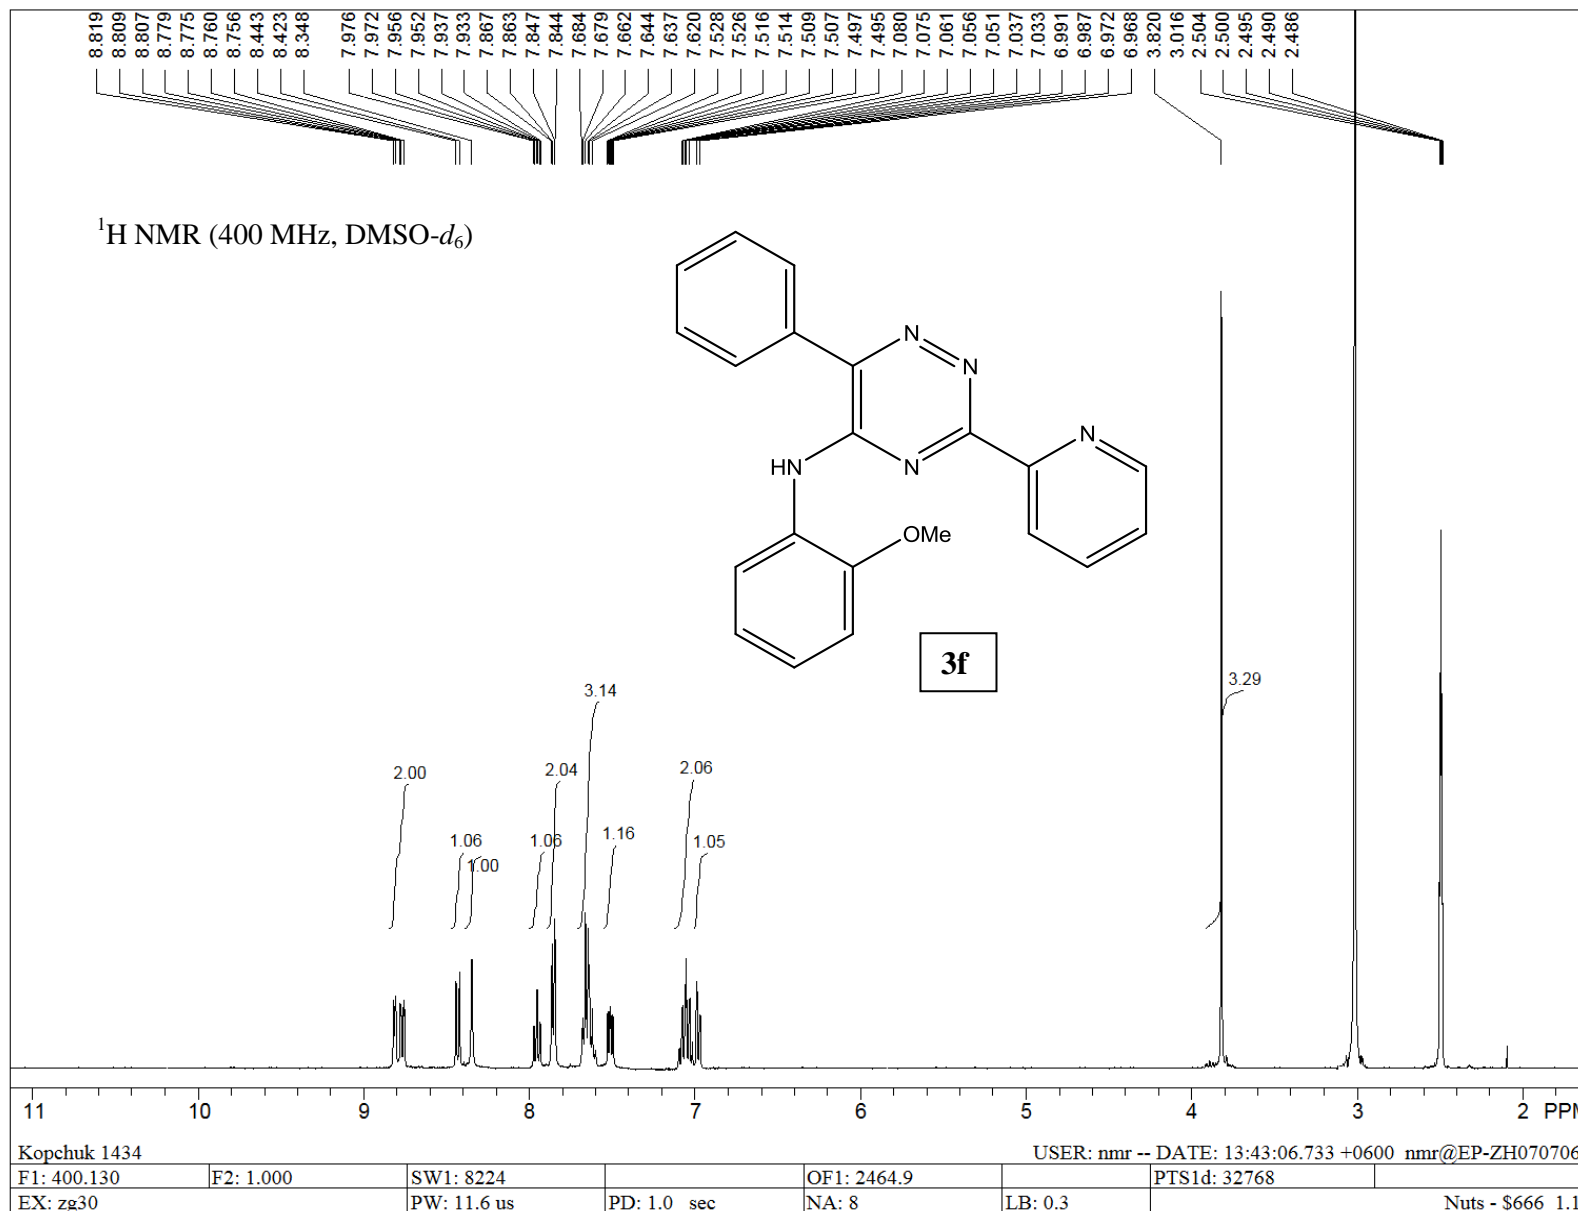

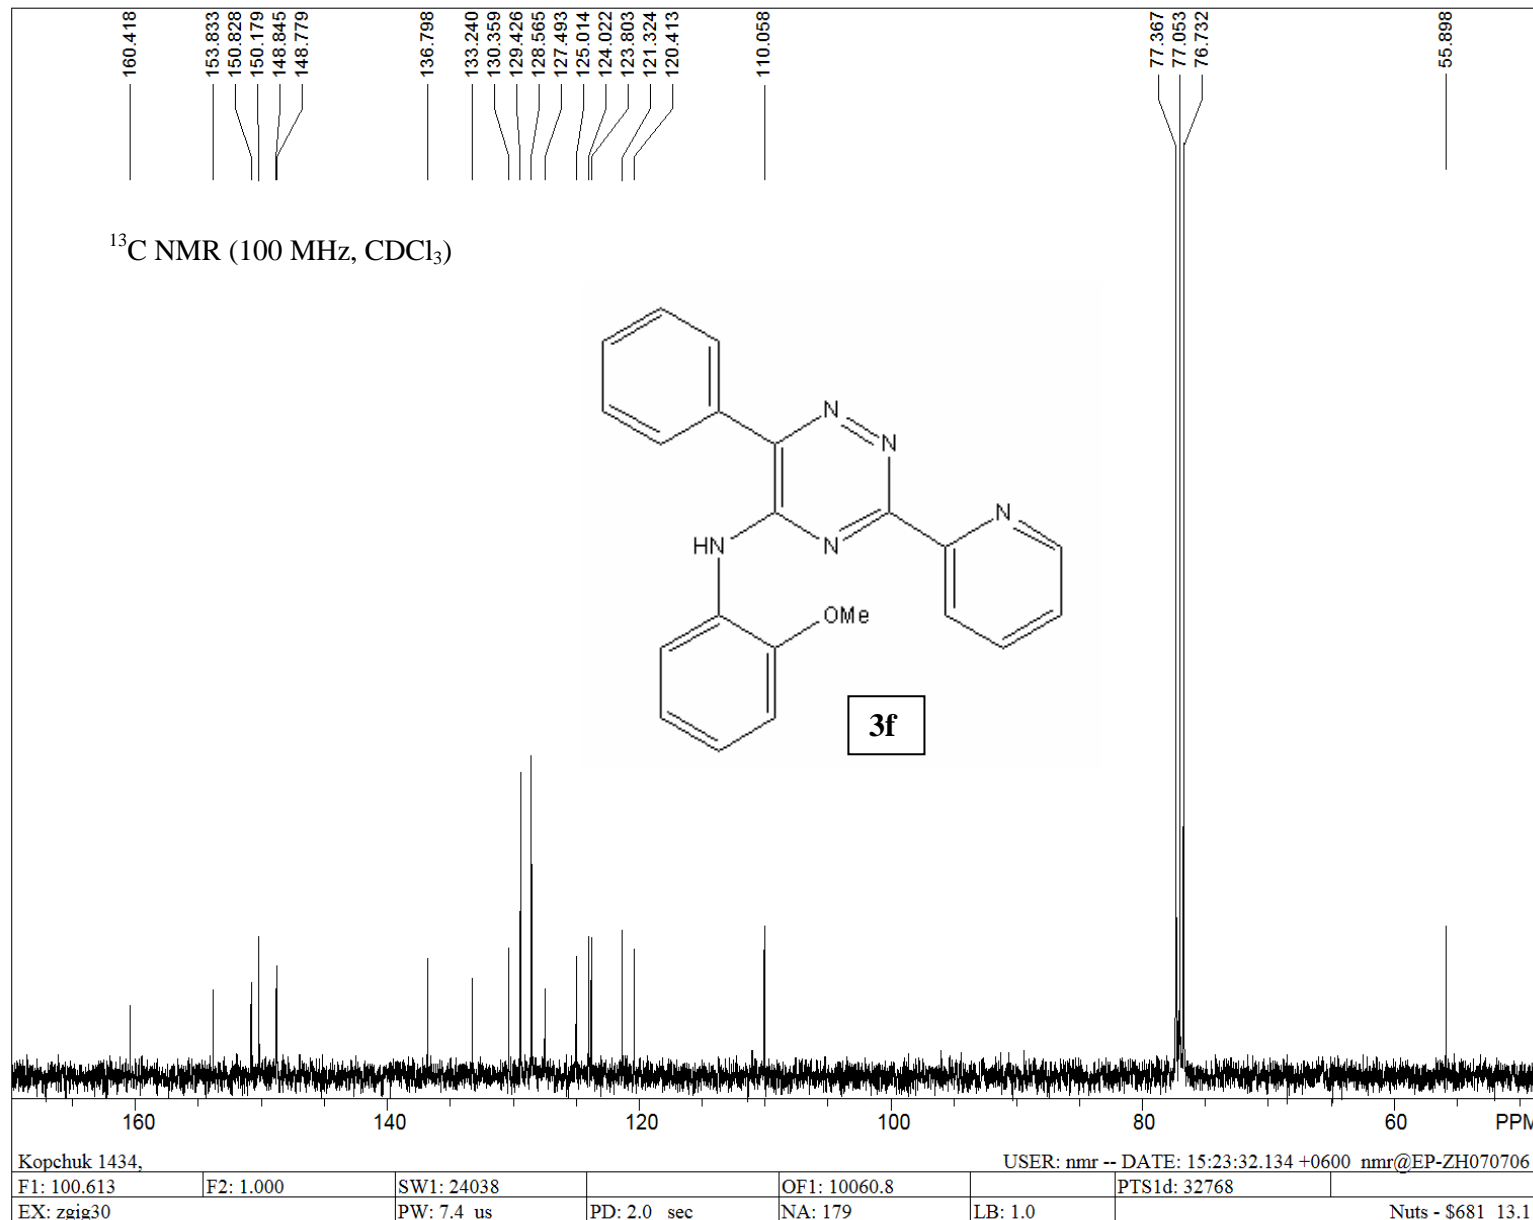

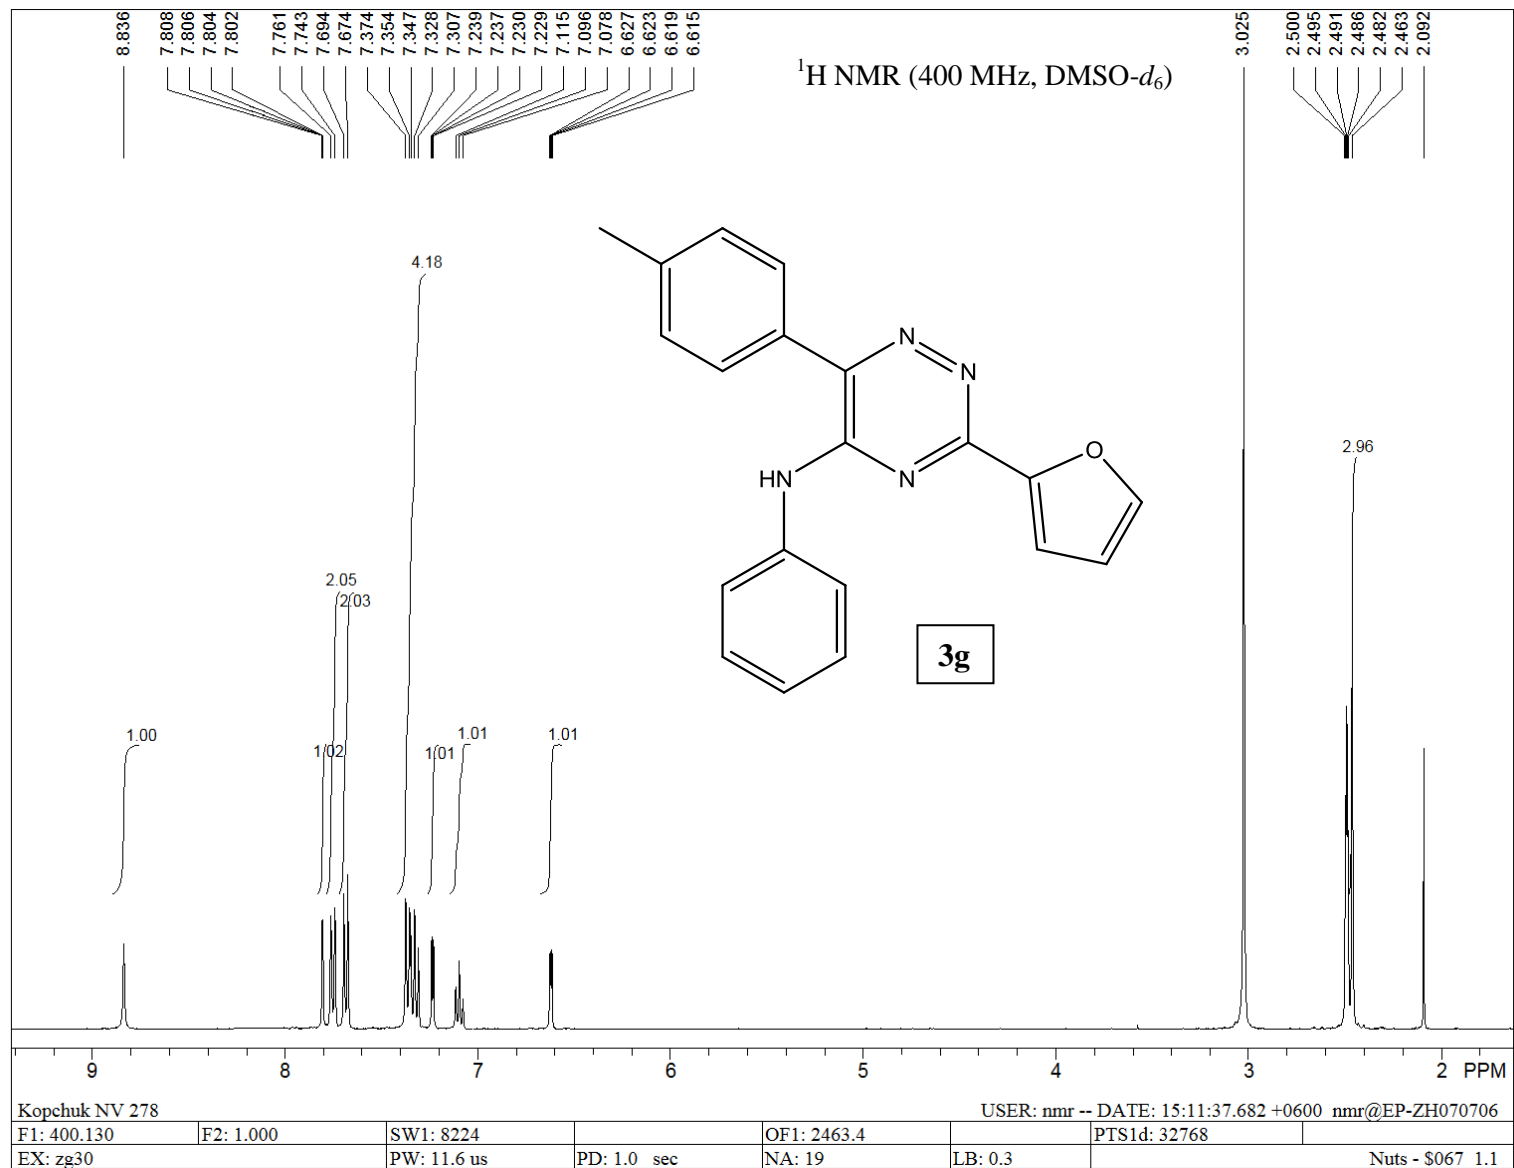

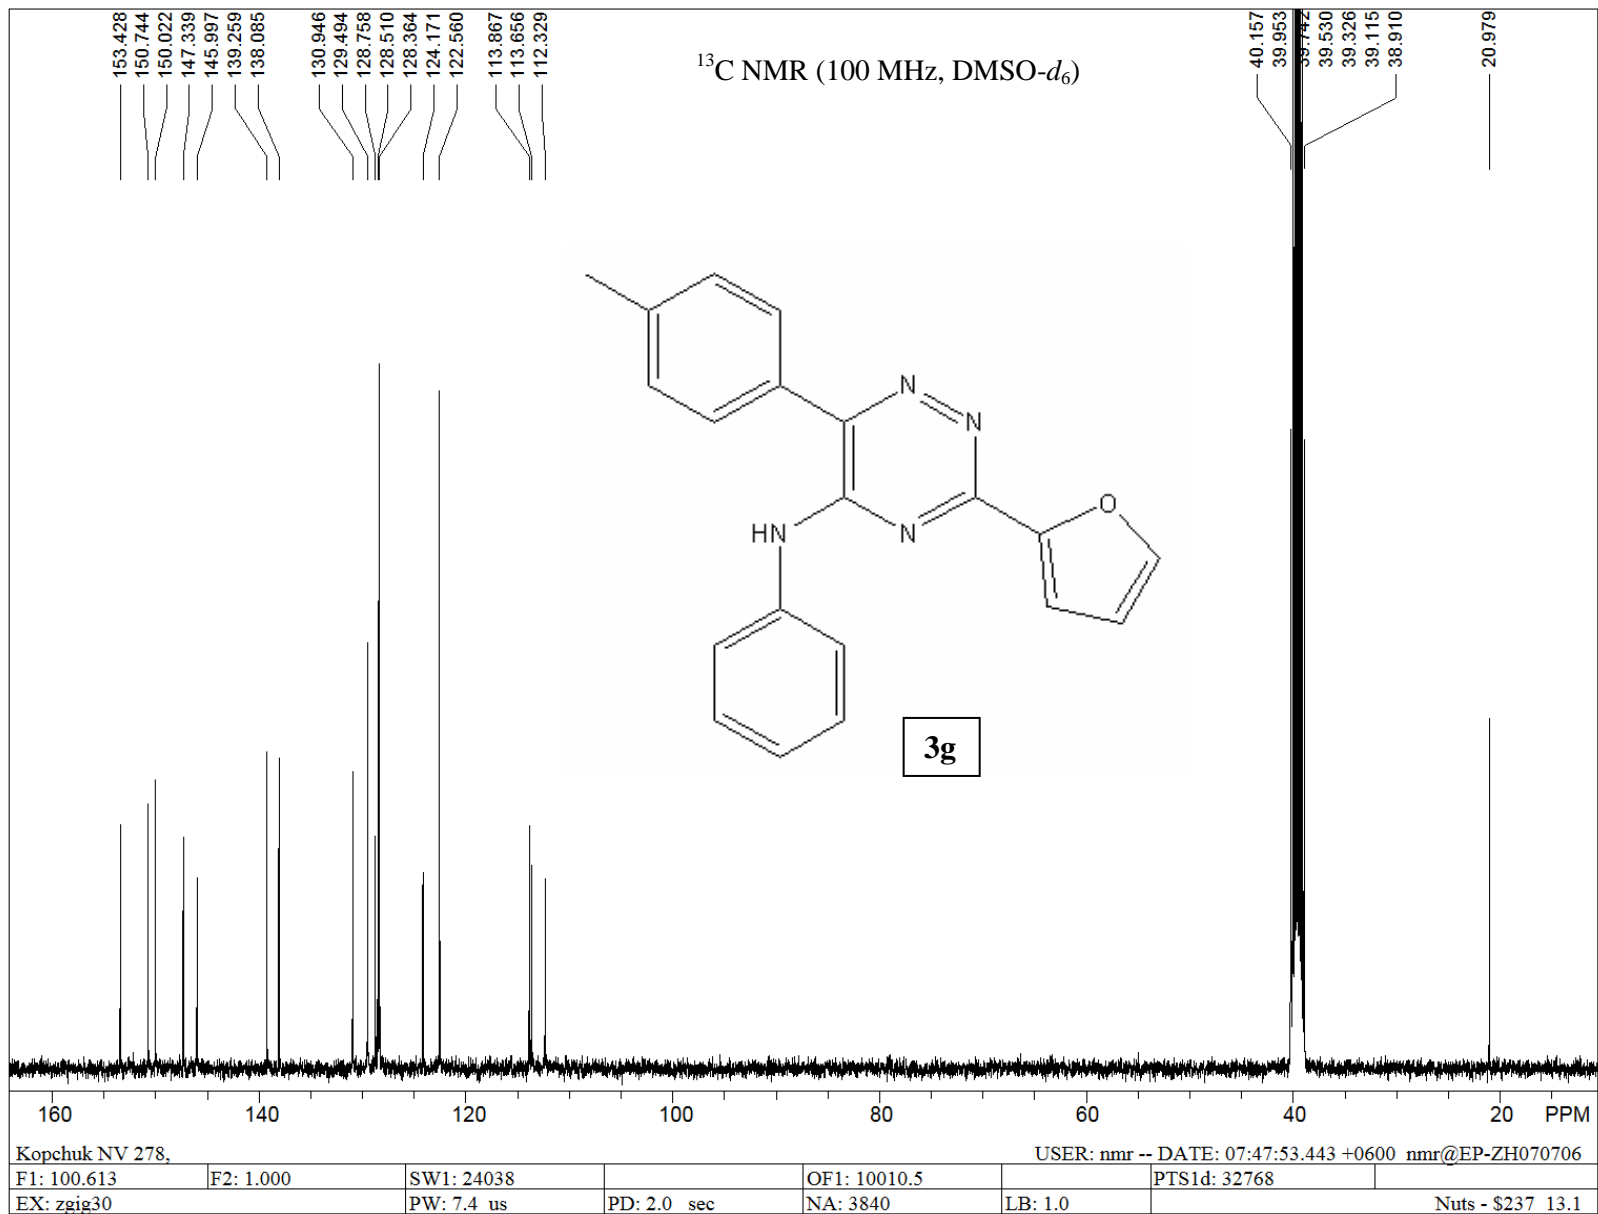

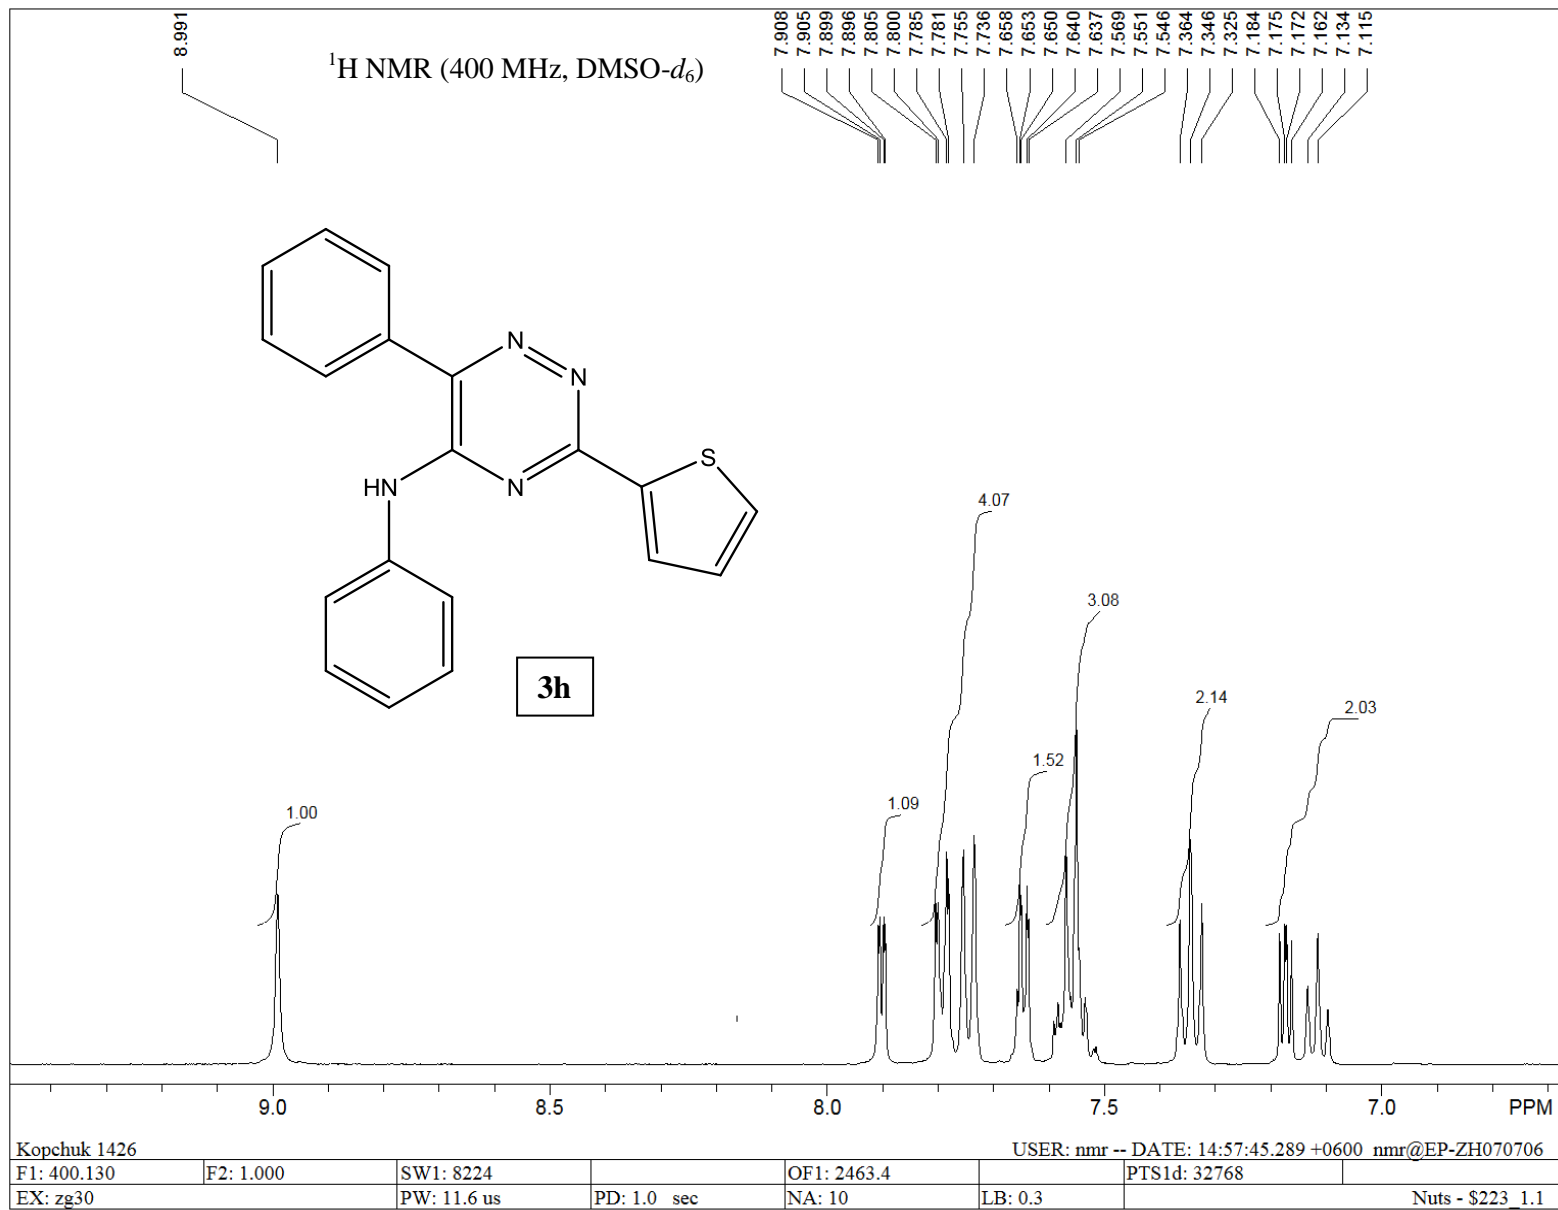

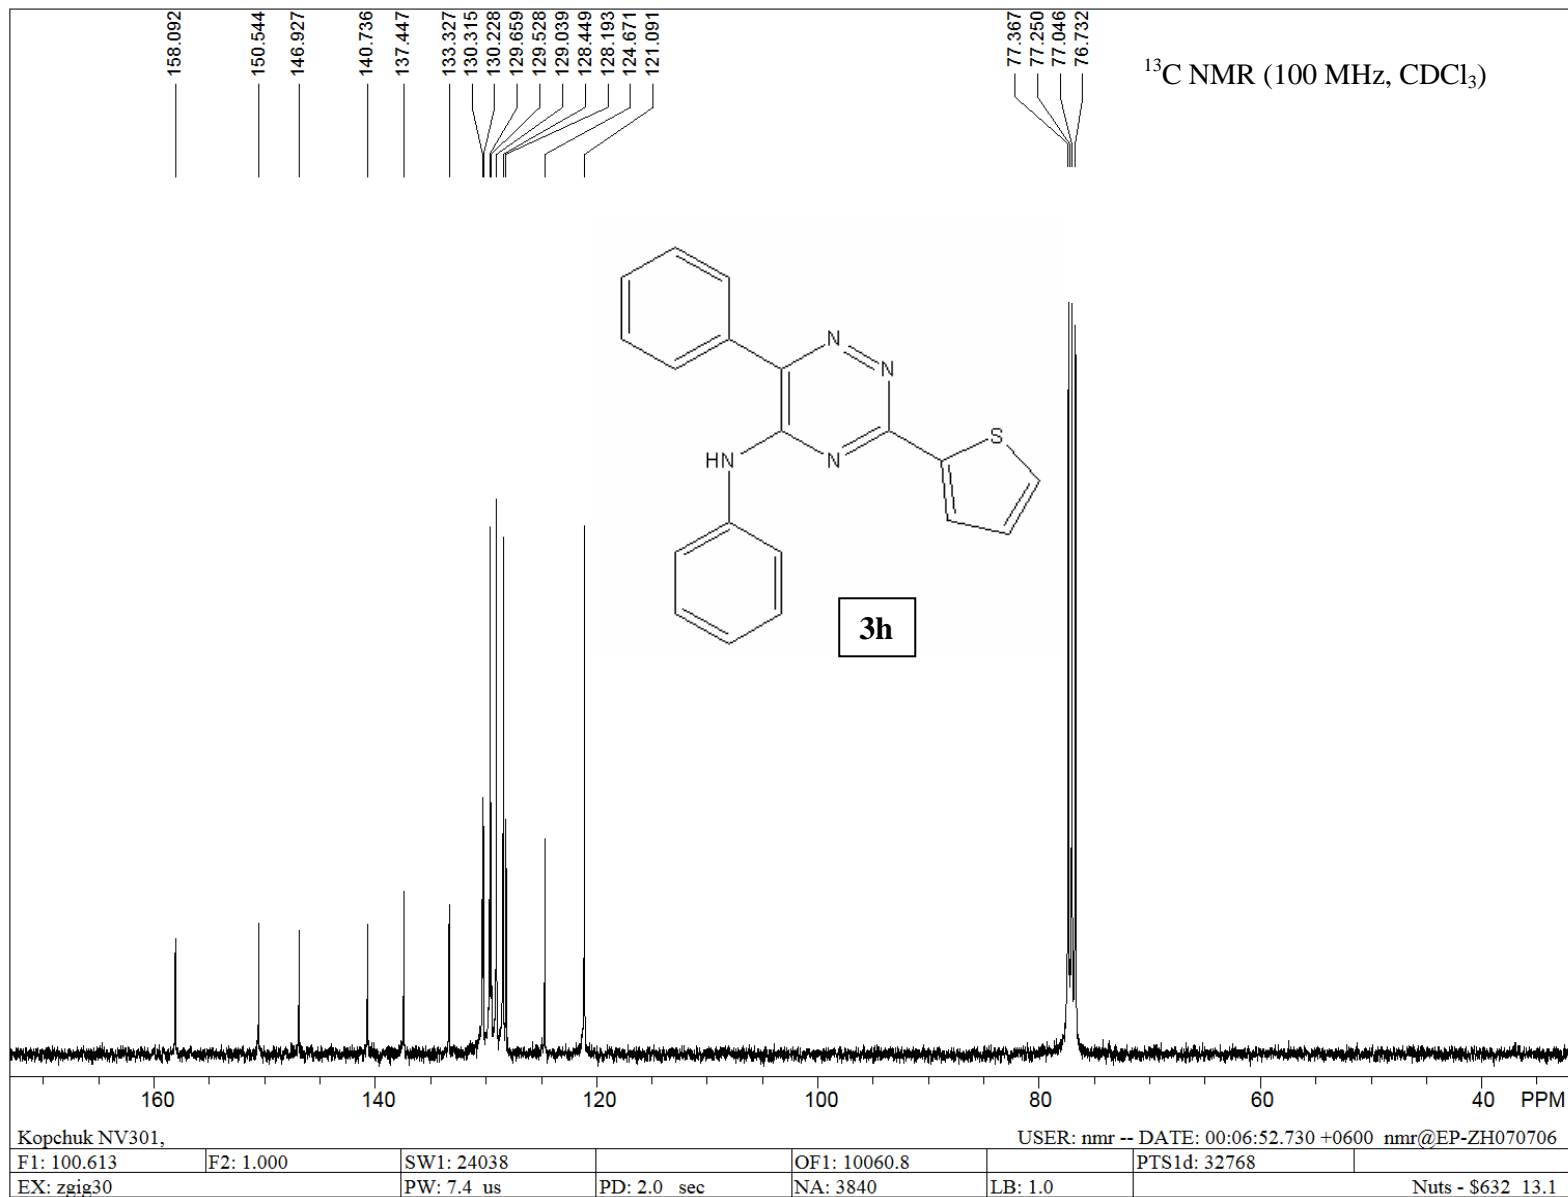

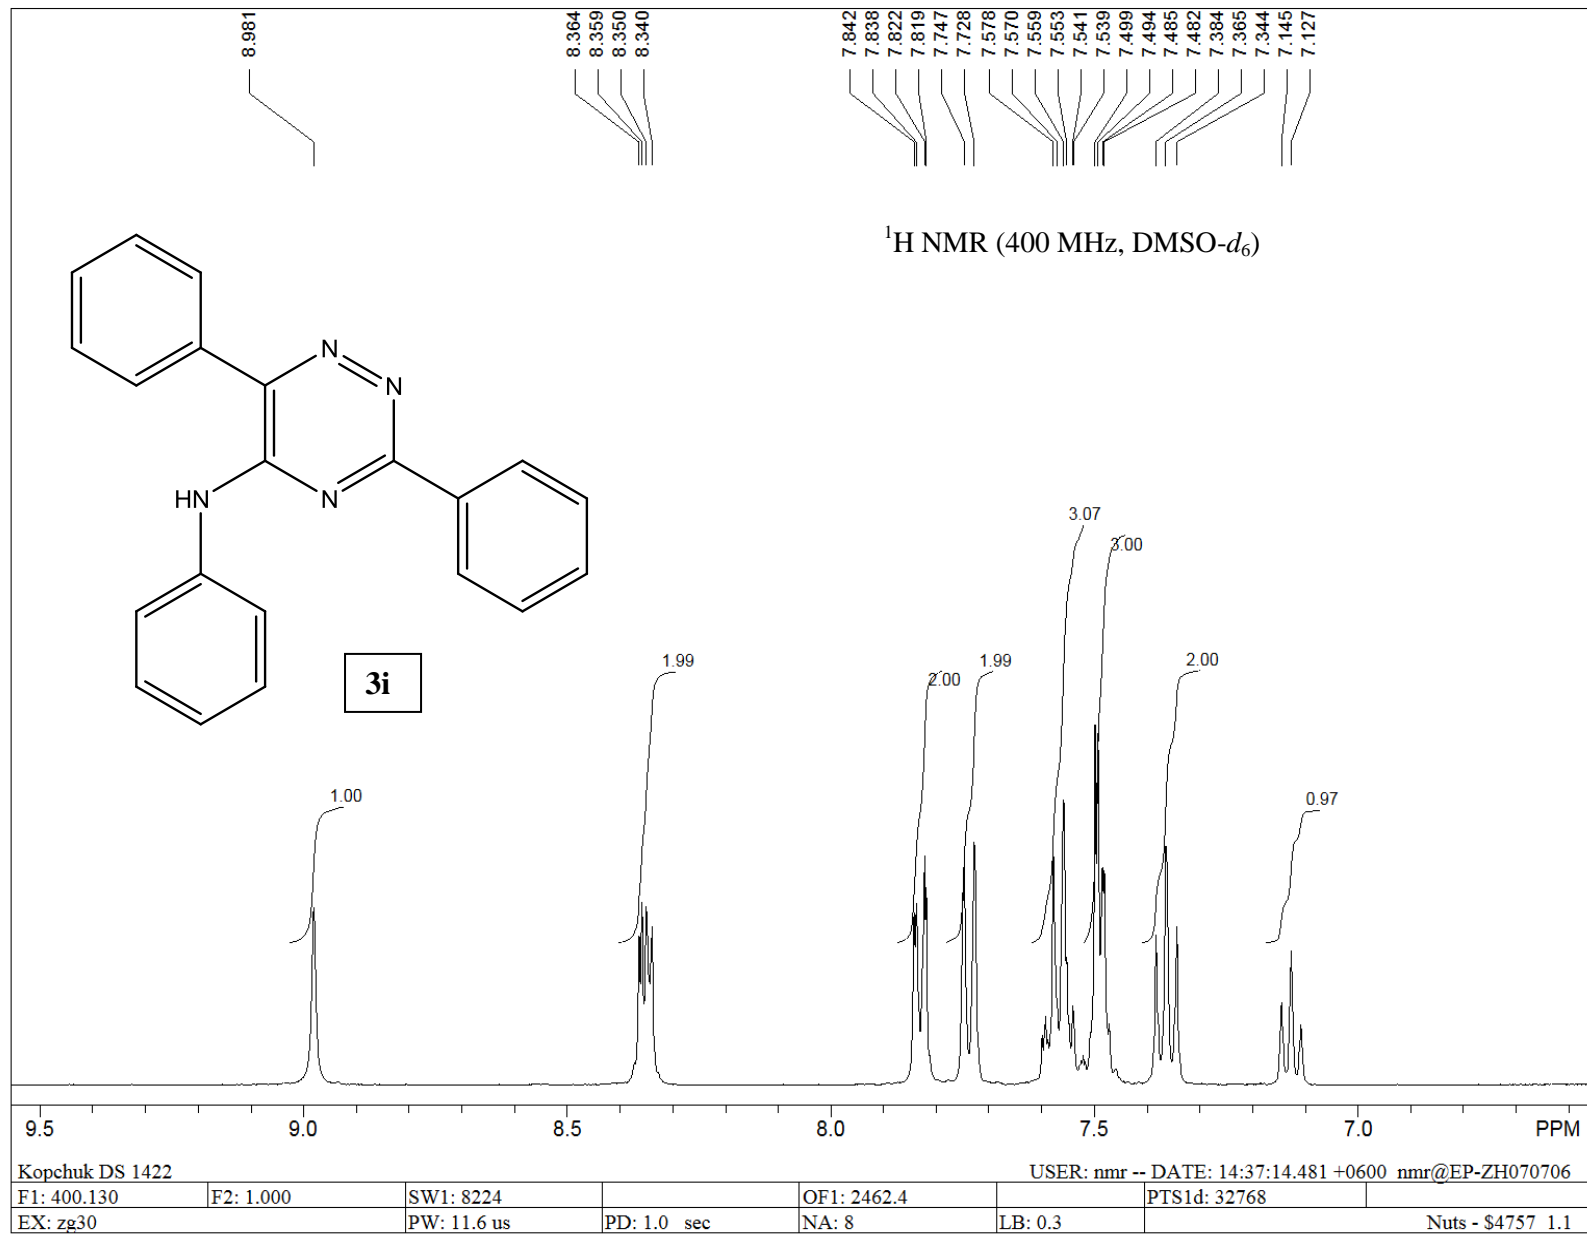



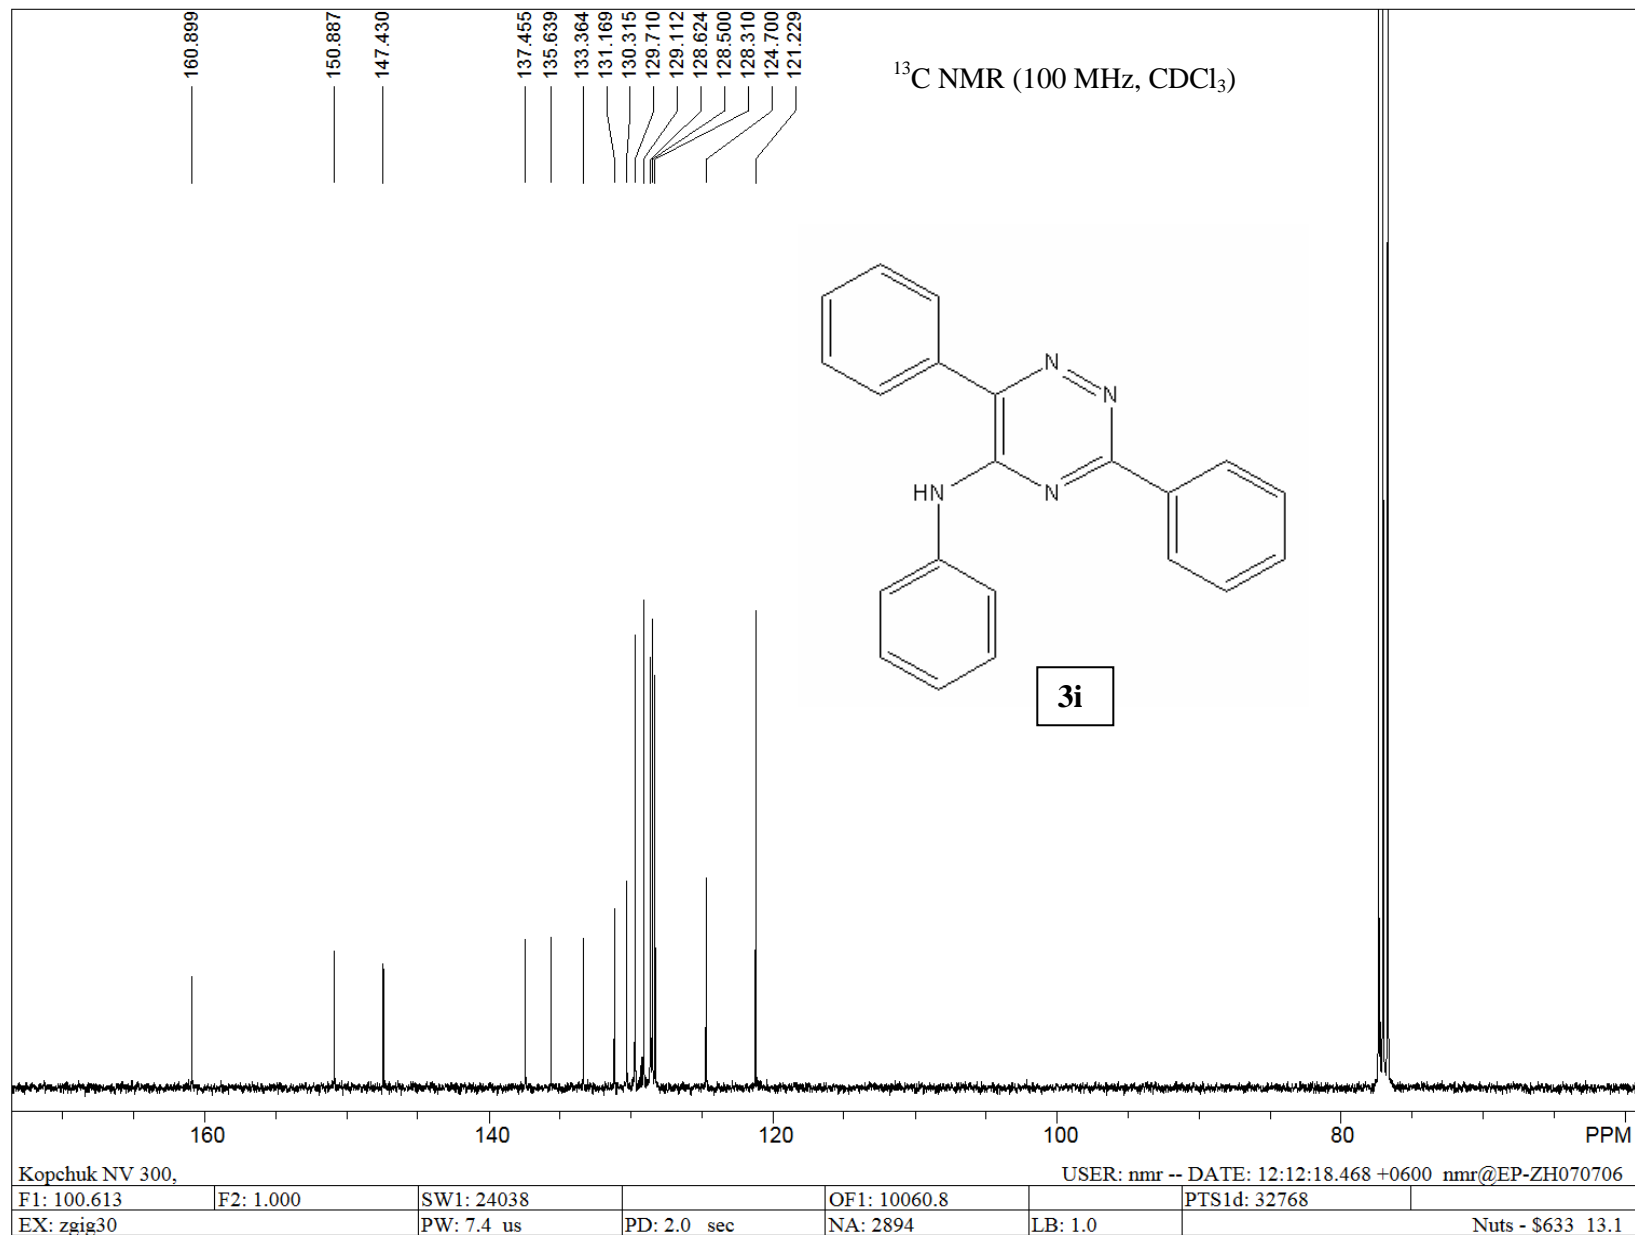

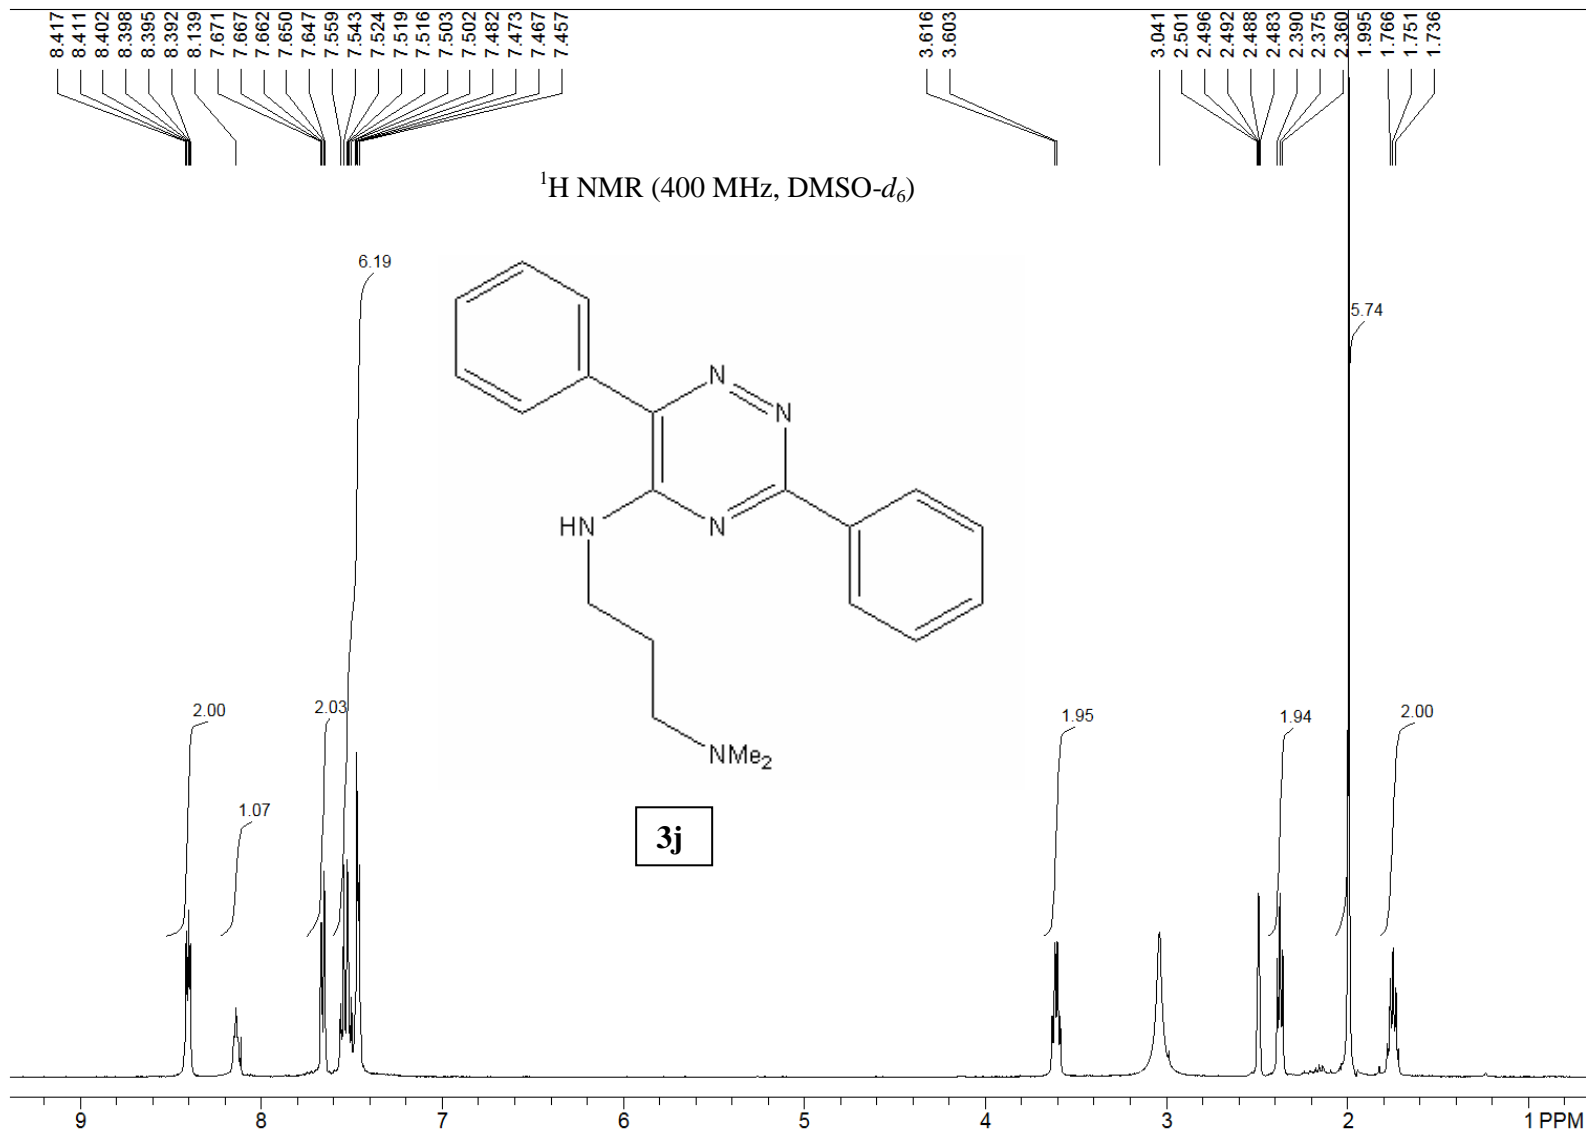

|              |           |             |             |                                                       |         |              |                  |
|--------------|-----------|-------------|-------------|-------------------------------------------------------|---------|--------------|------------------|
| Kopchuk 1435 |           |             |             | USER: nmr -- DATE: 13:50:56.710 +0600 nmr@EP-ZH070706 |         |              |                  |
| F1: 400.130  | F2: 1.000 | SW1: 8224   |             | OF1: 2463.7                                           |         | PTS1d: 32768 |                  |
| EX: zg30     |           | PW: 11.6 us | PD: 1.0 sec | NA: 8                                                 | LB: 0.3 |              | Nuts - \$665 1.1 |

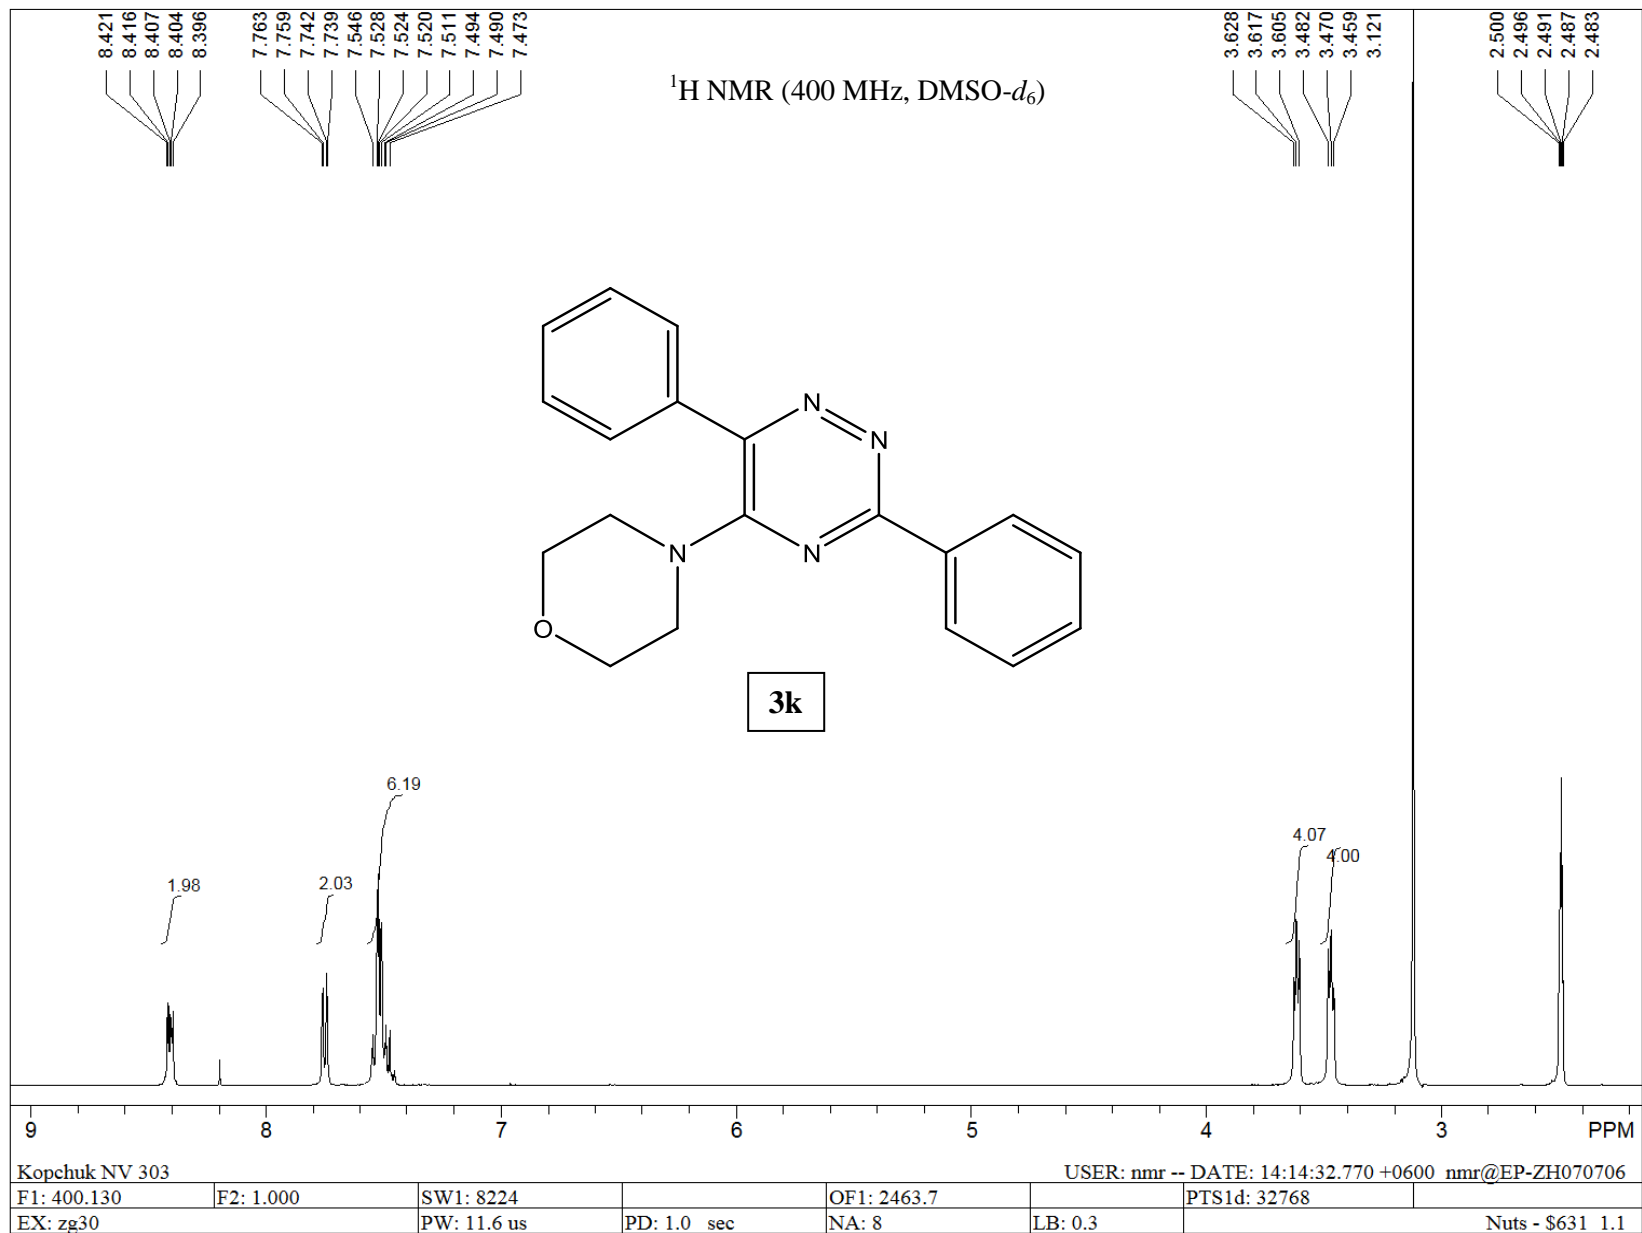

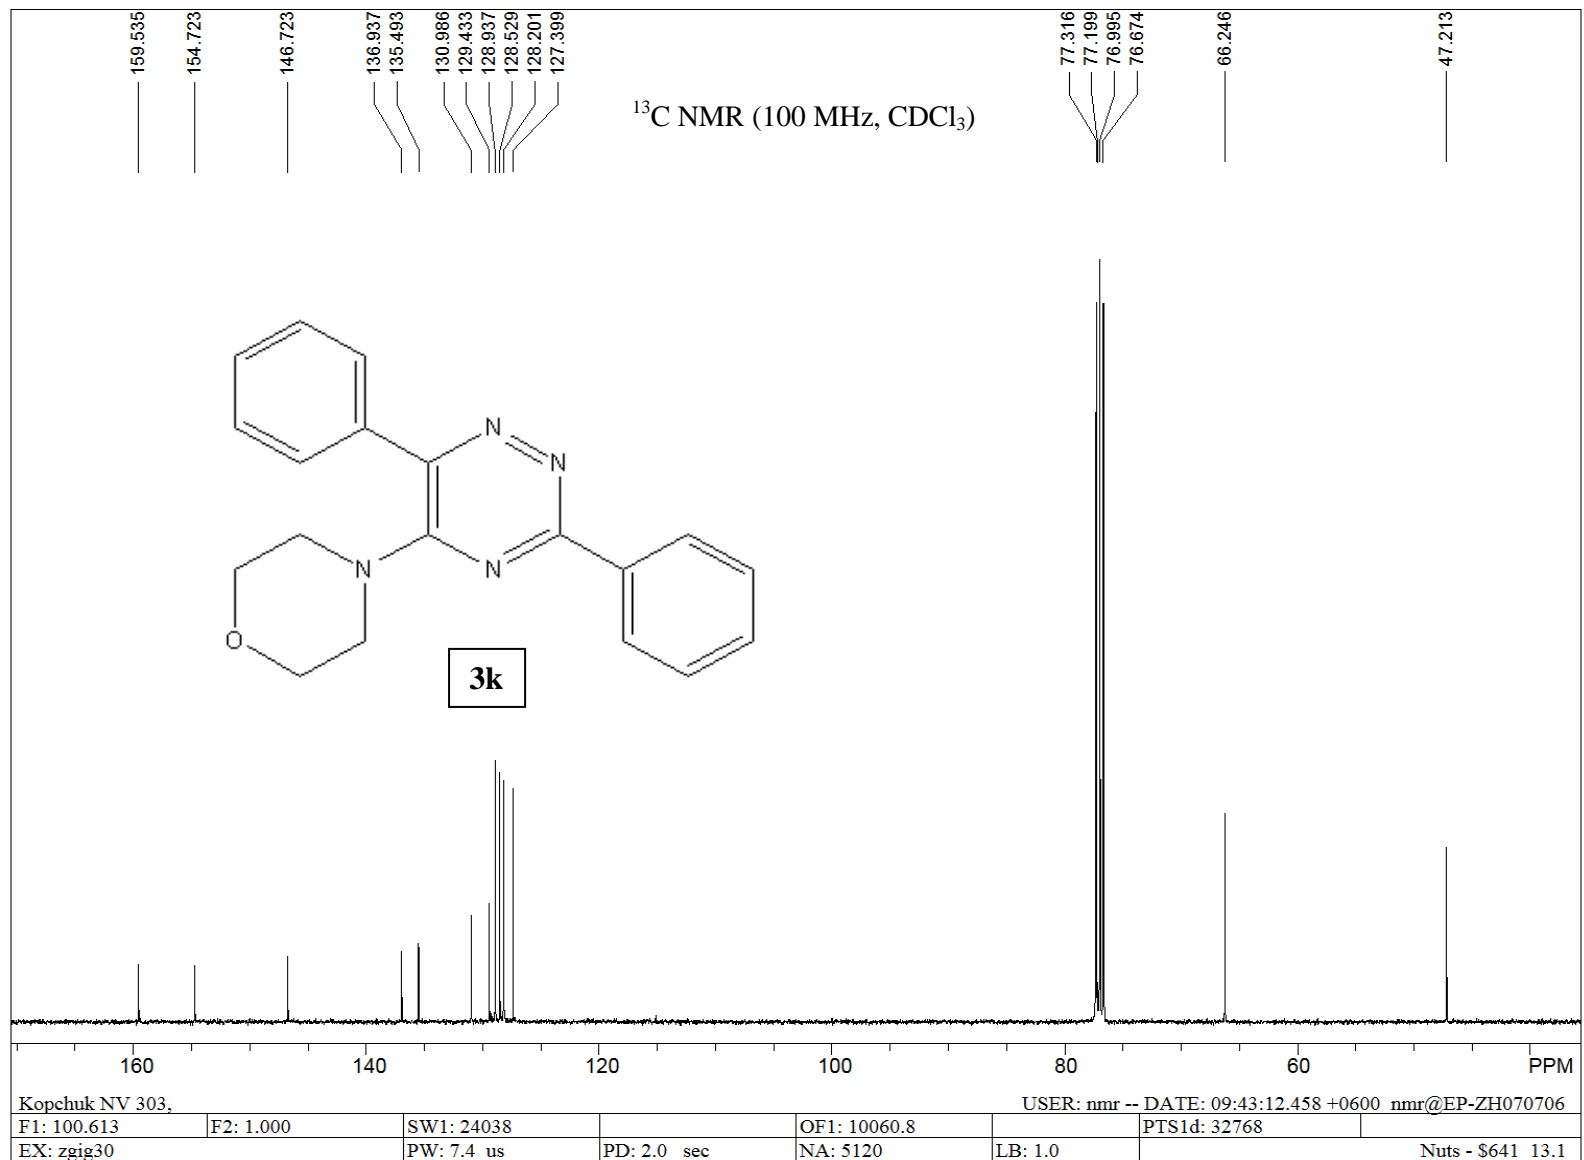

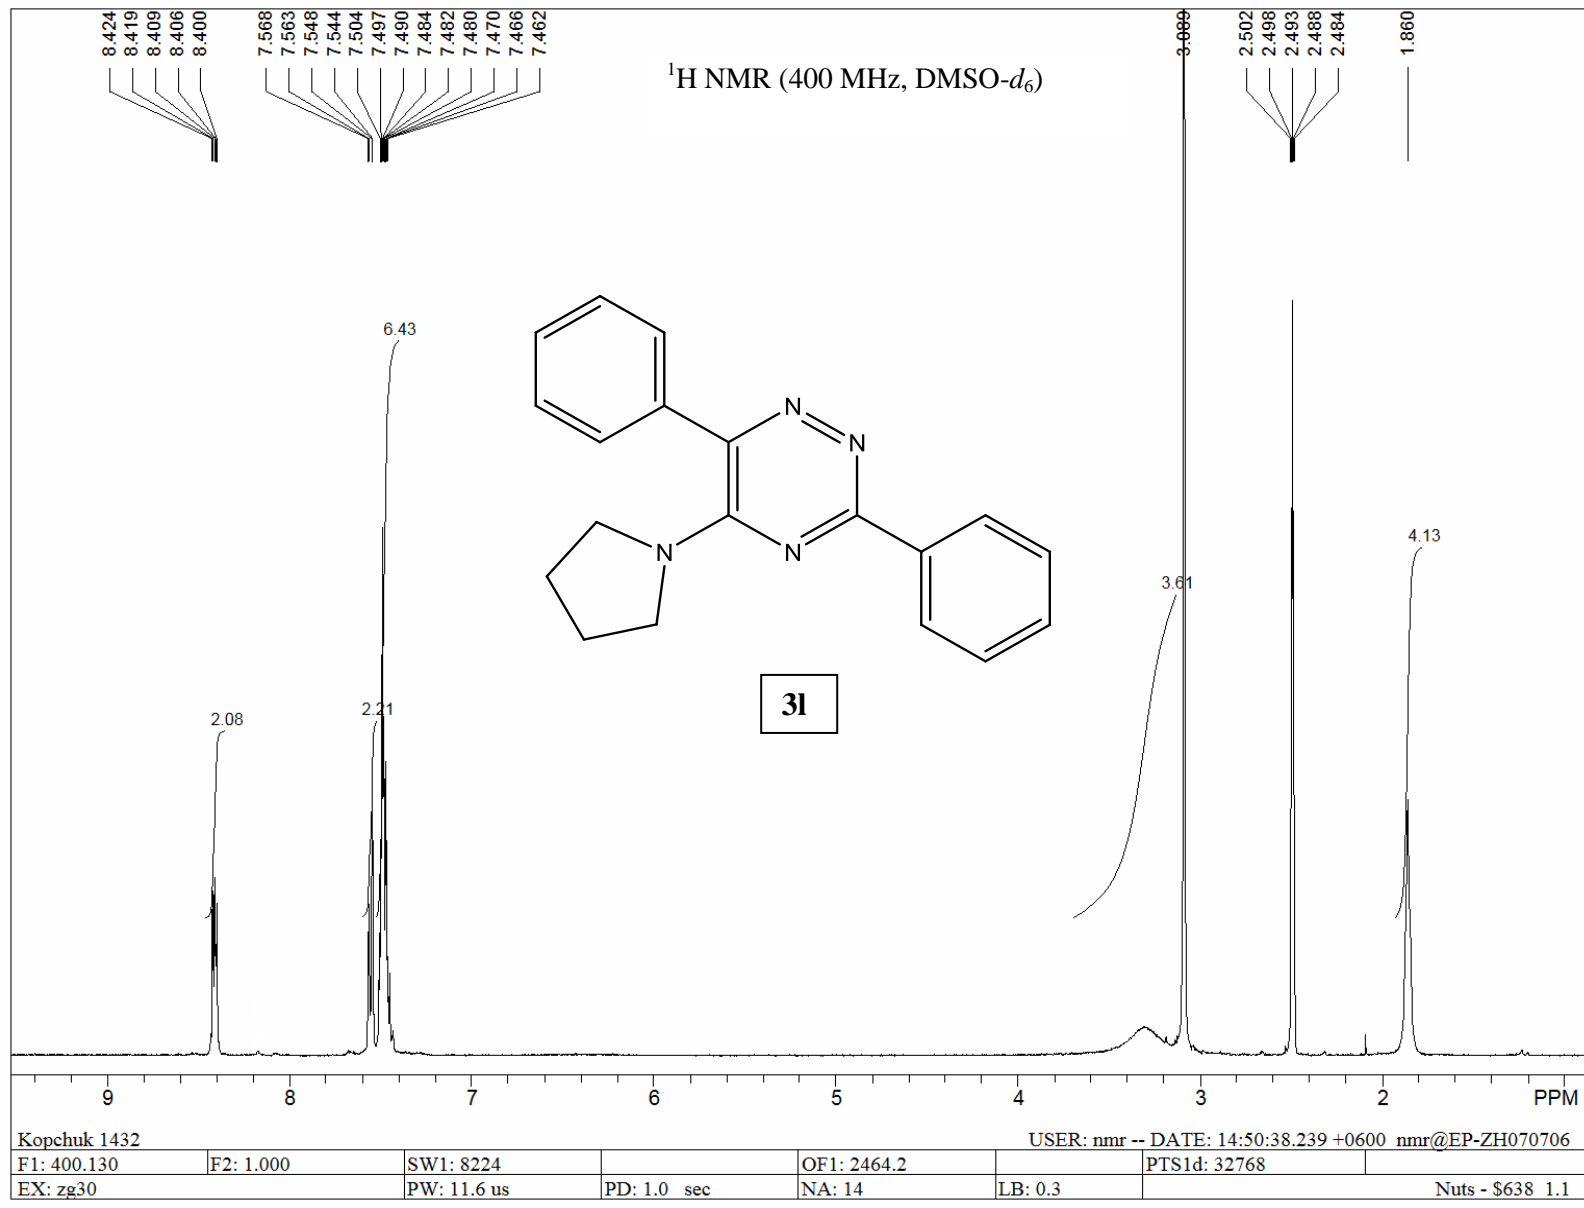

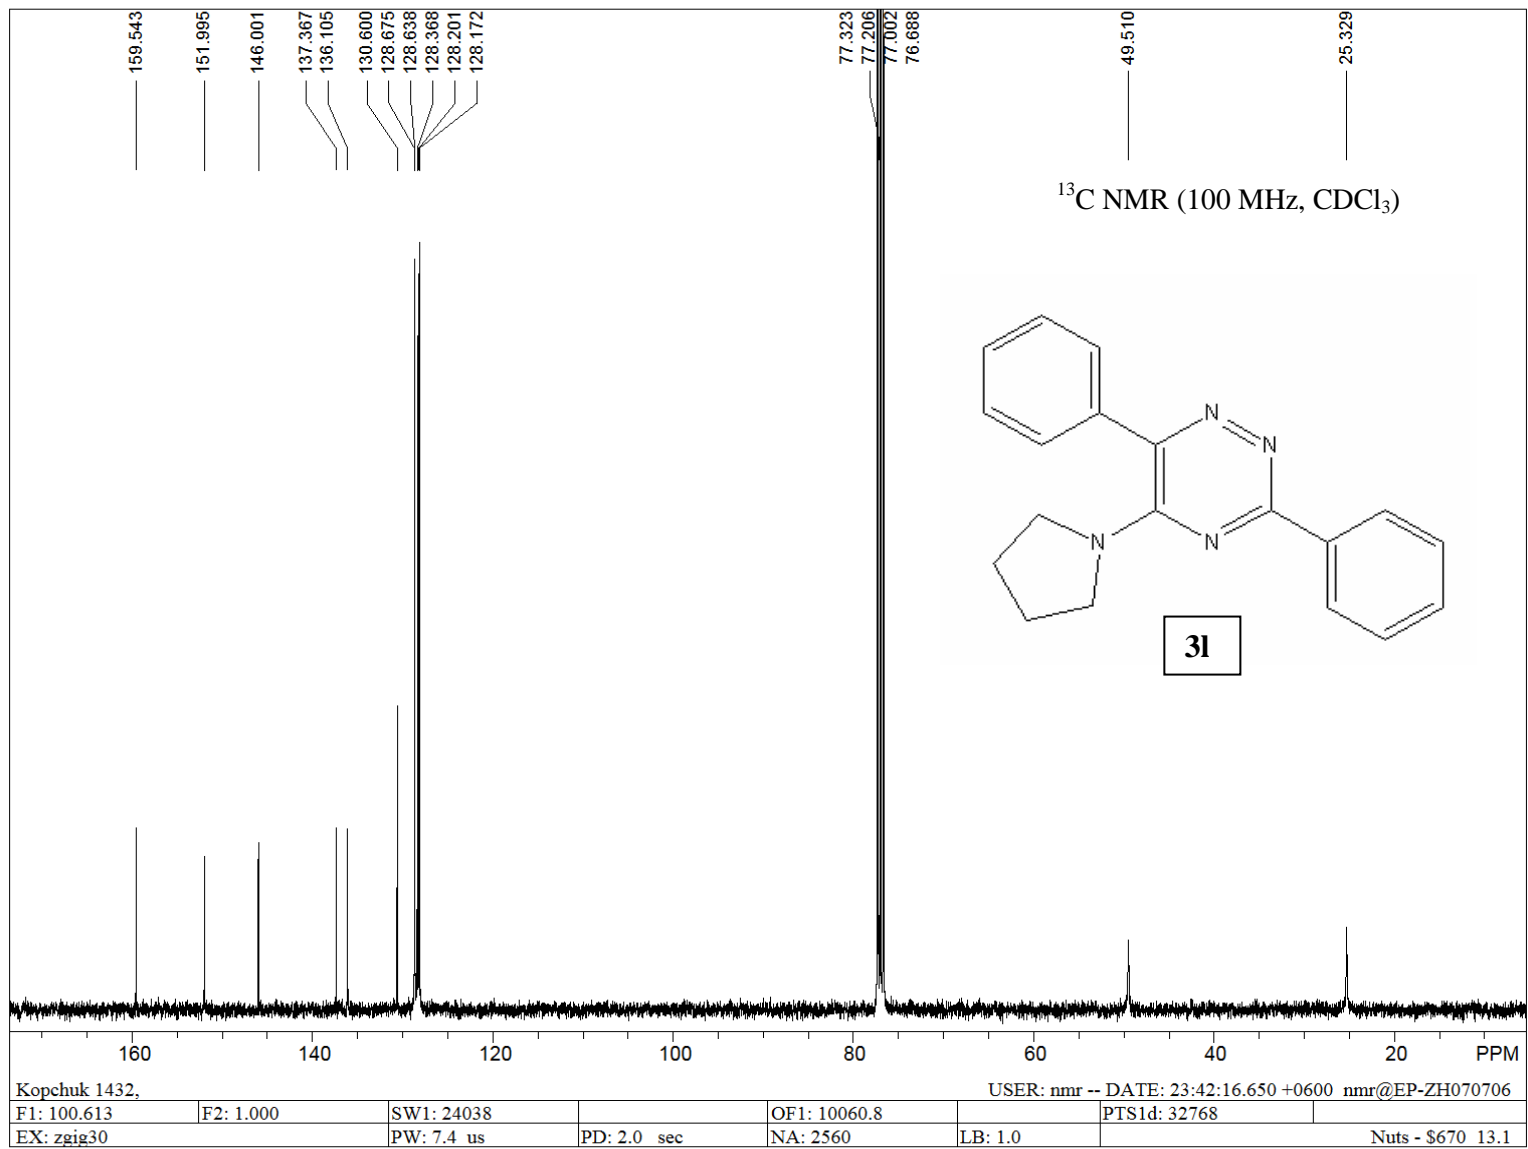

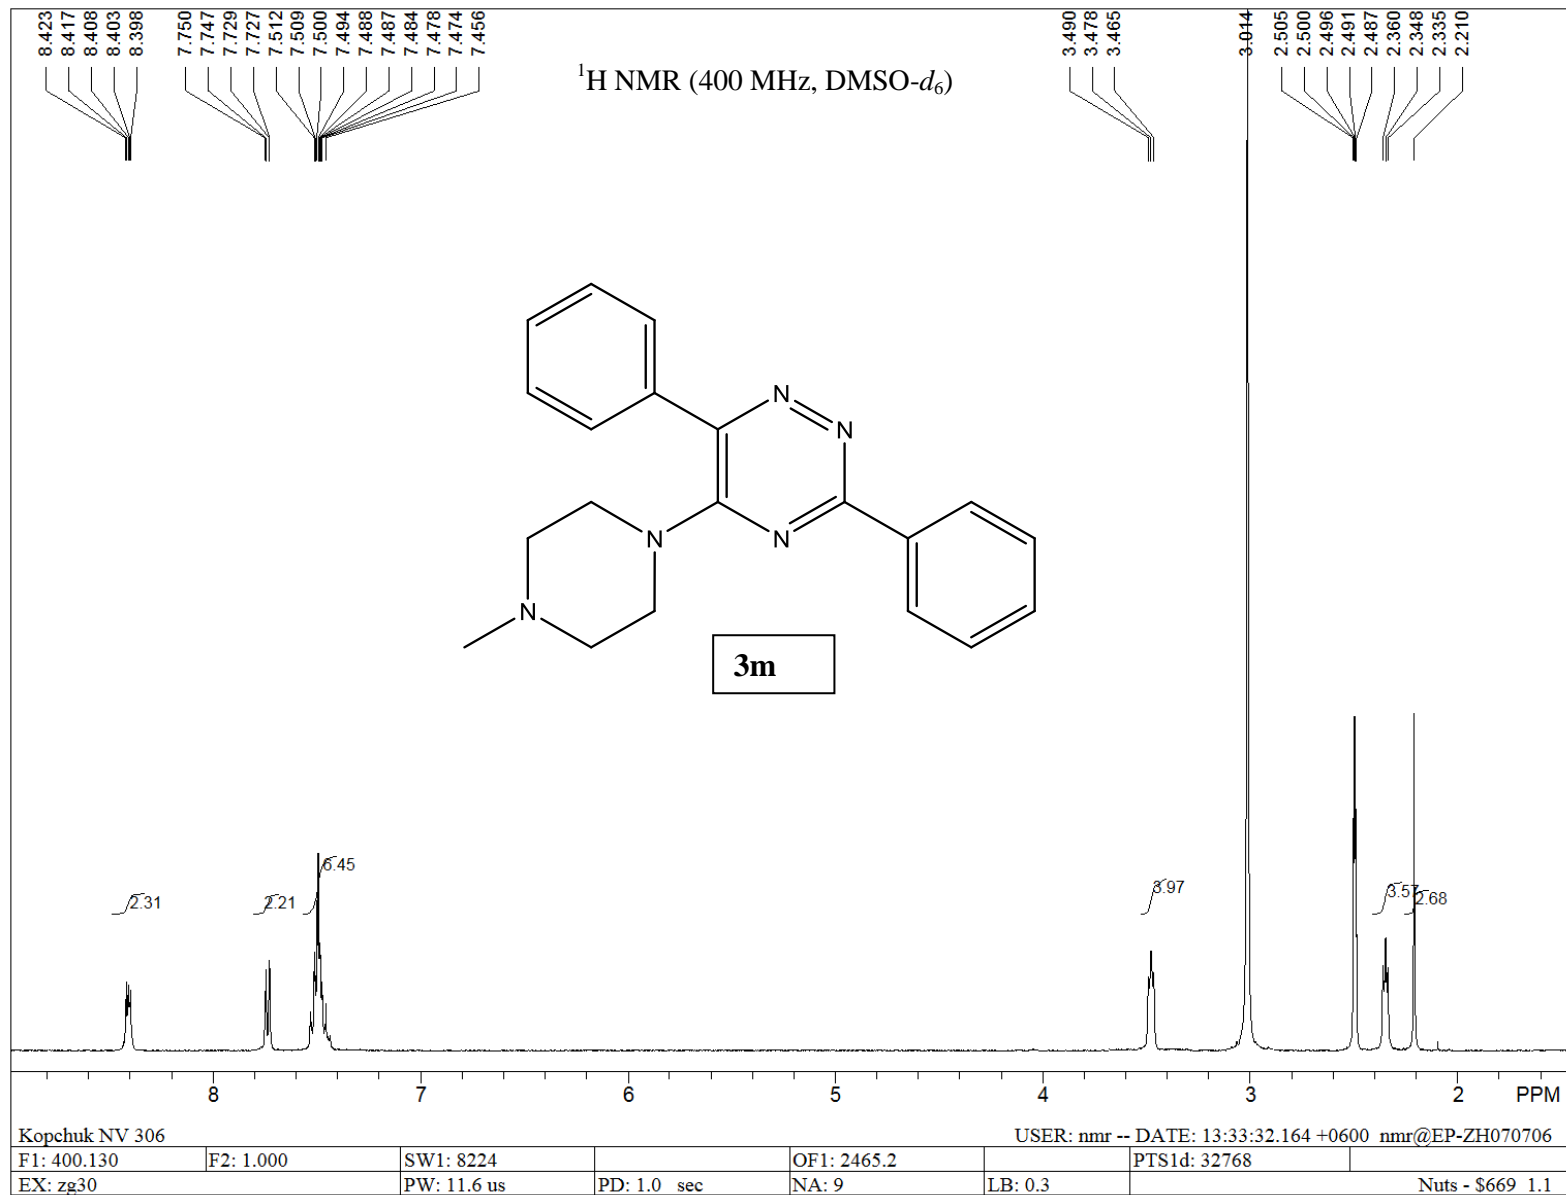

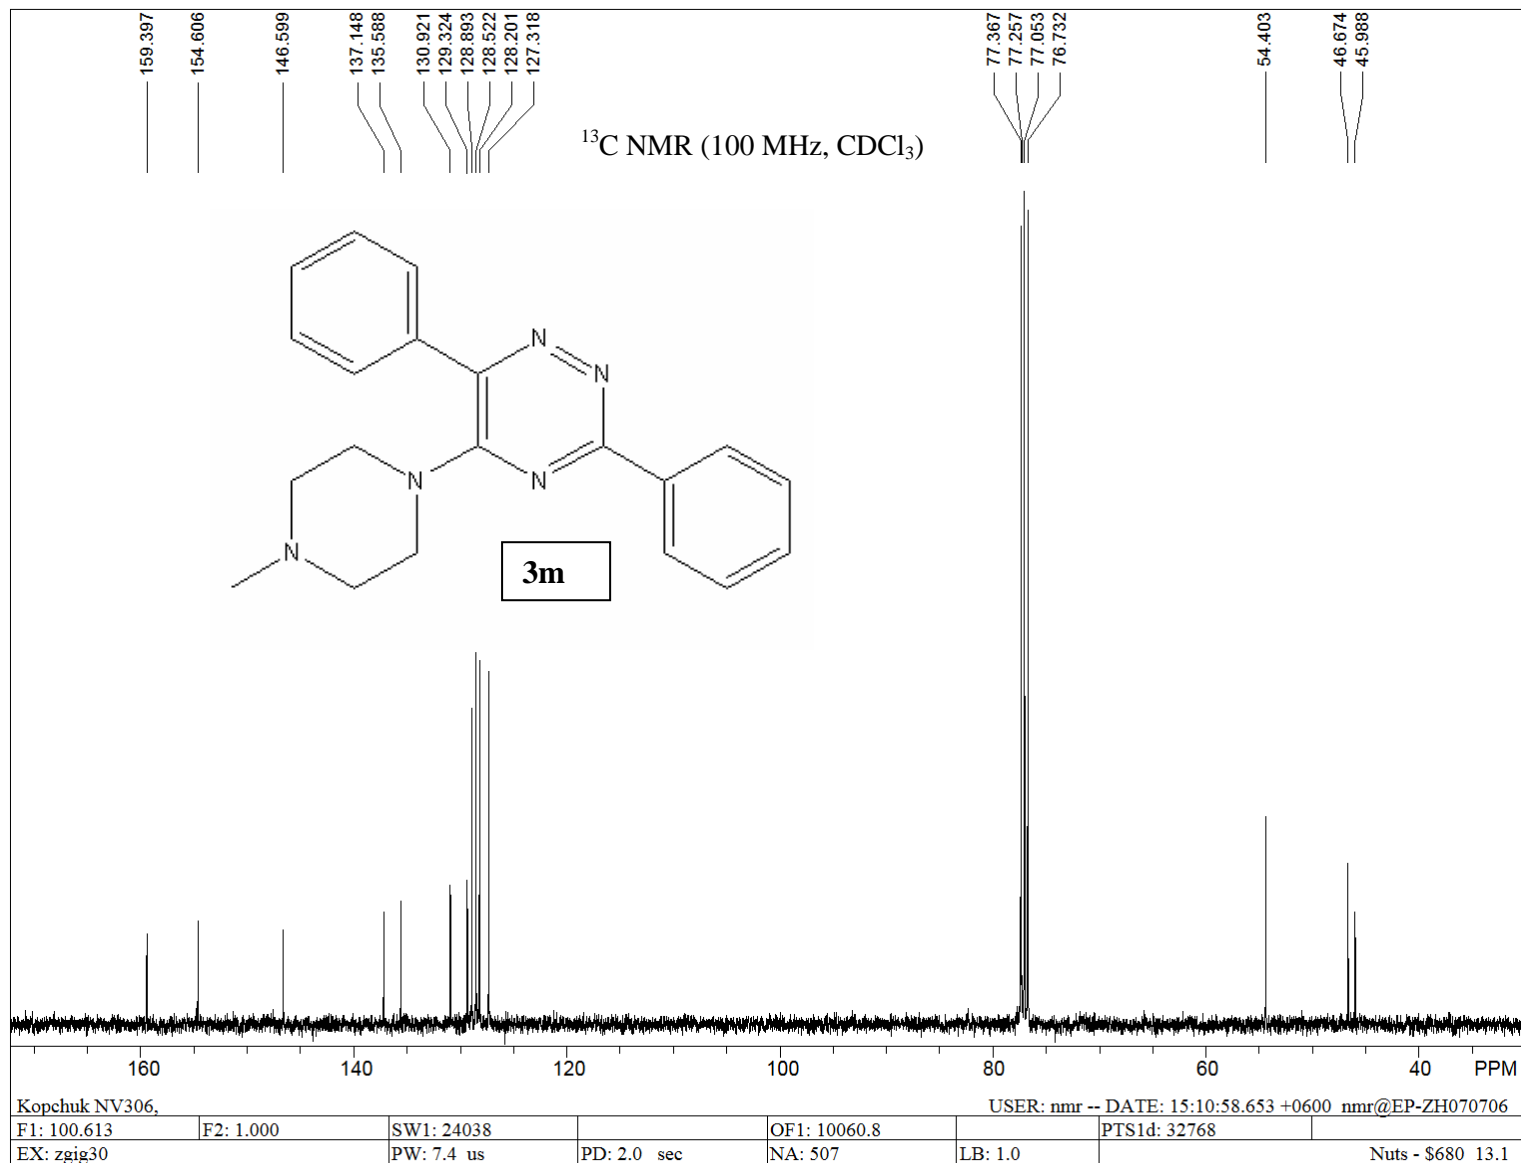



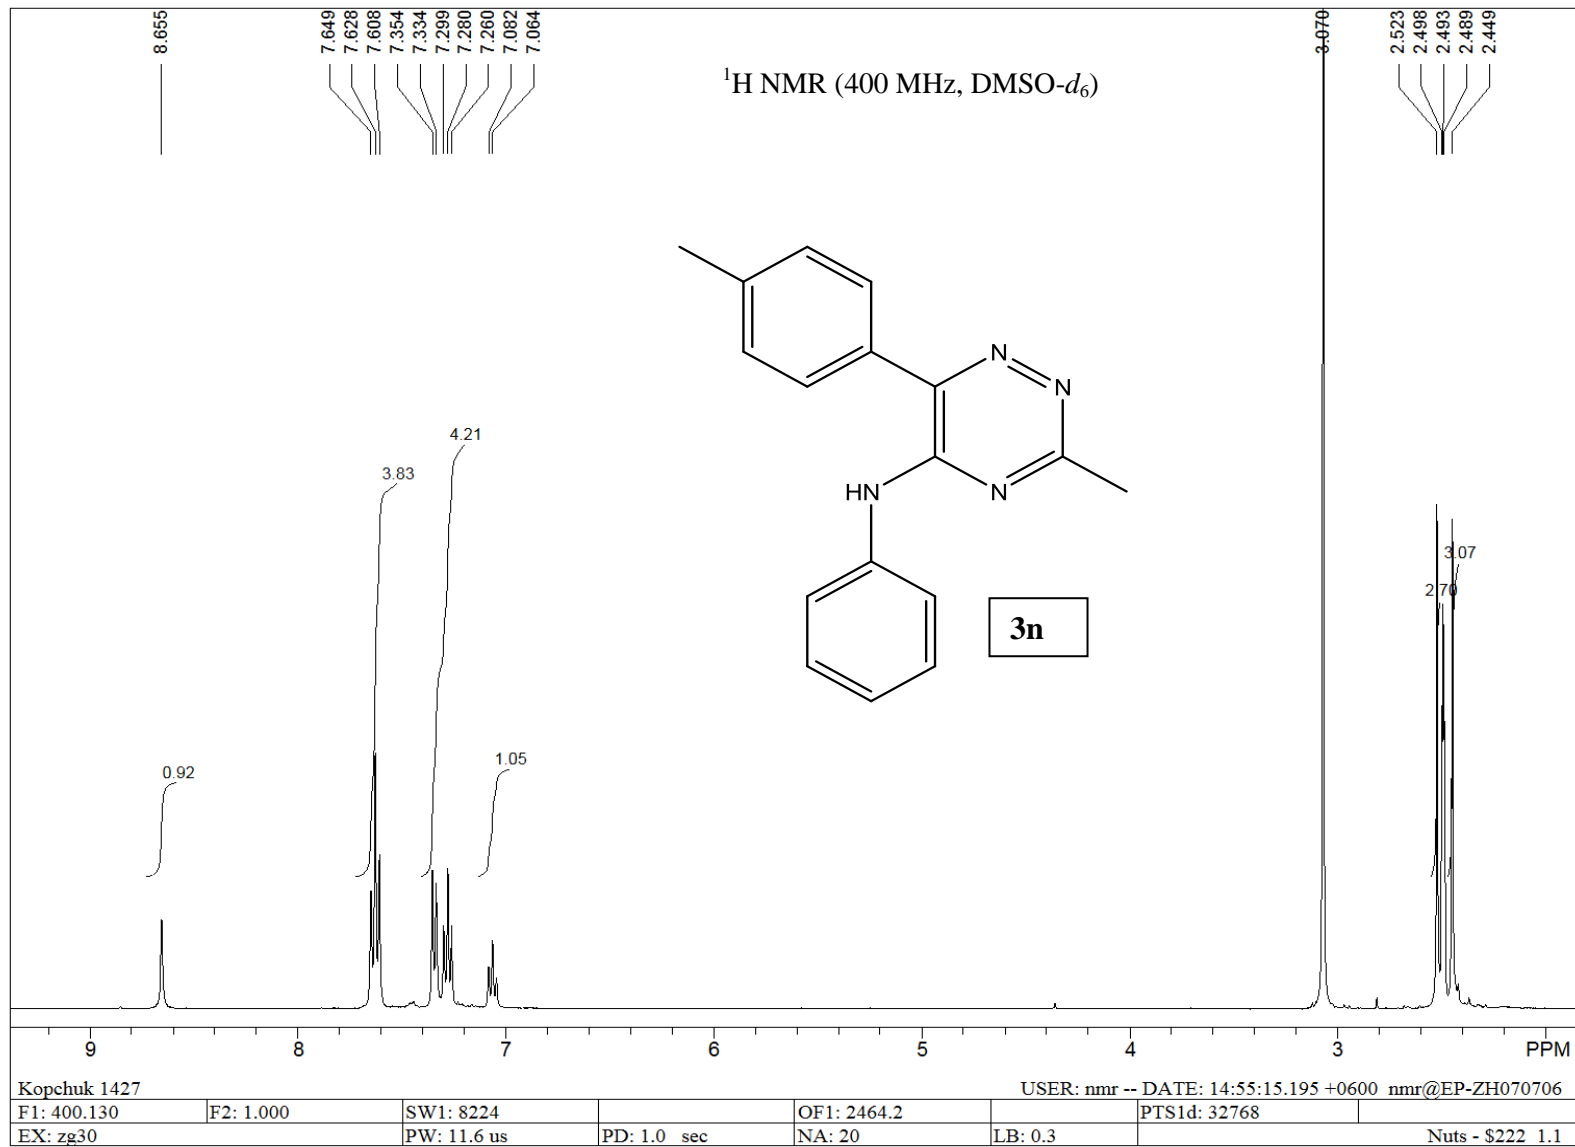

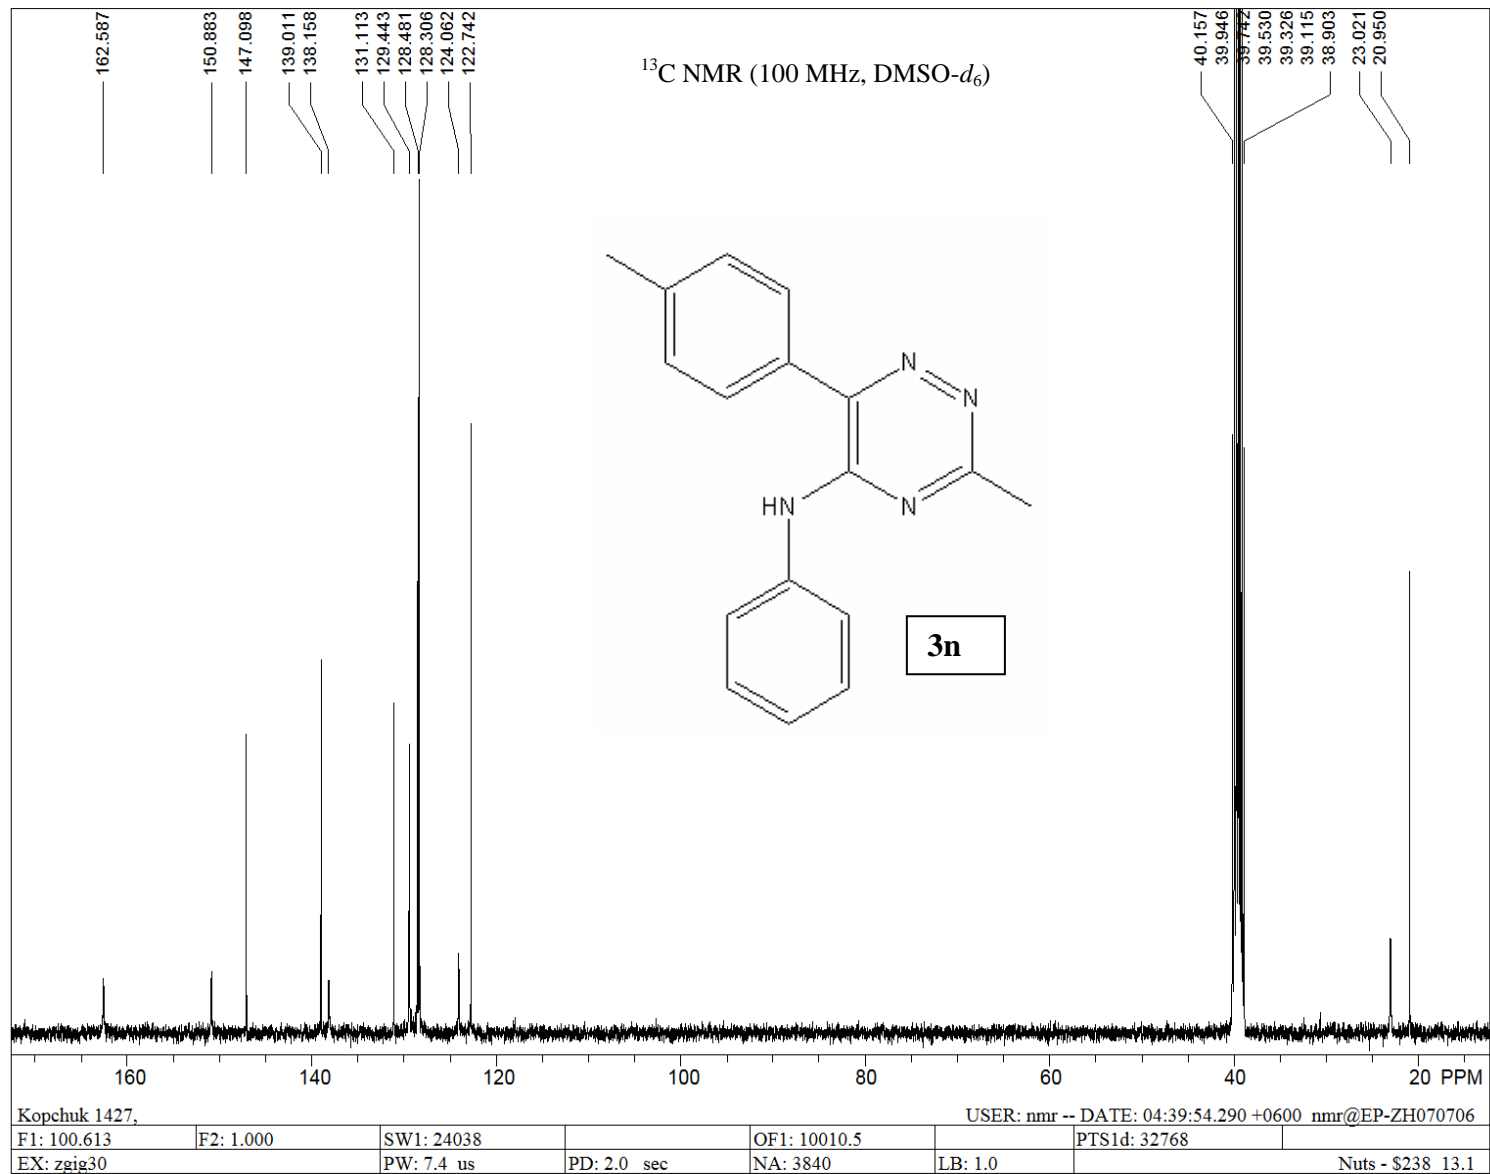

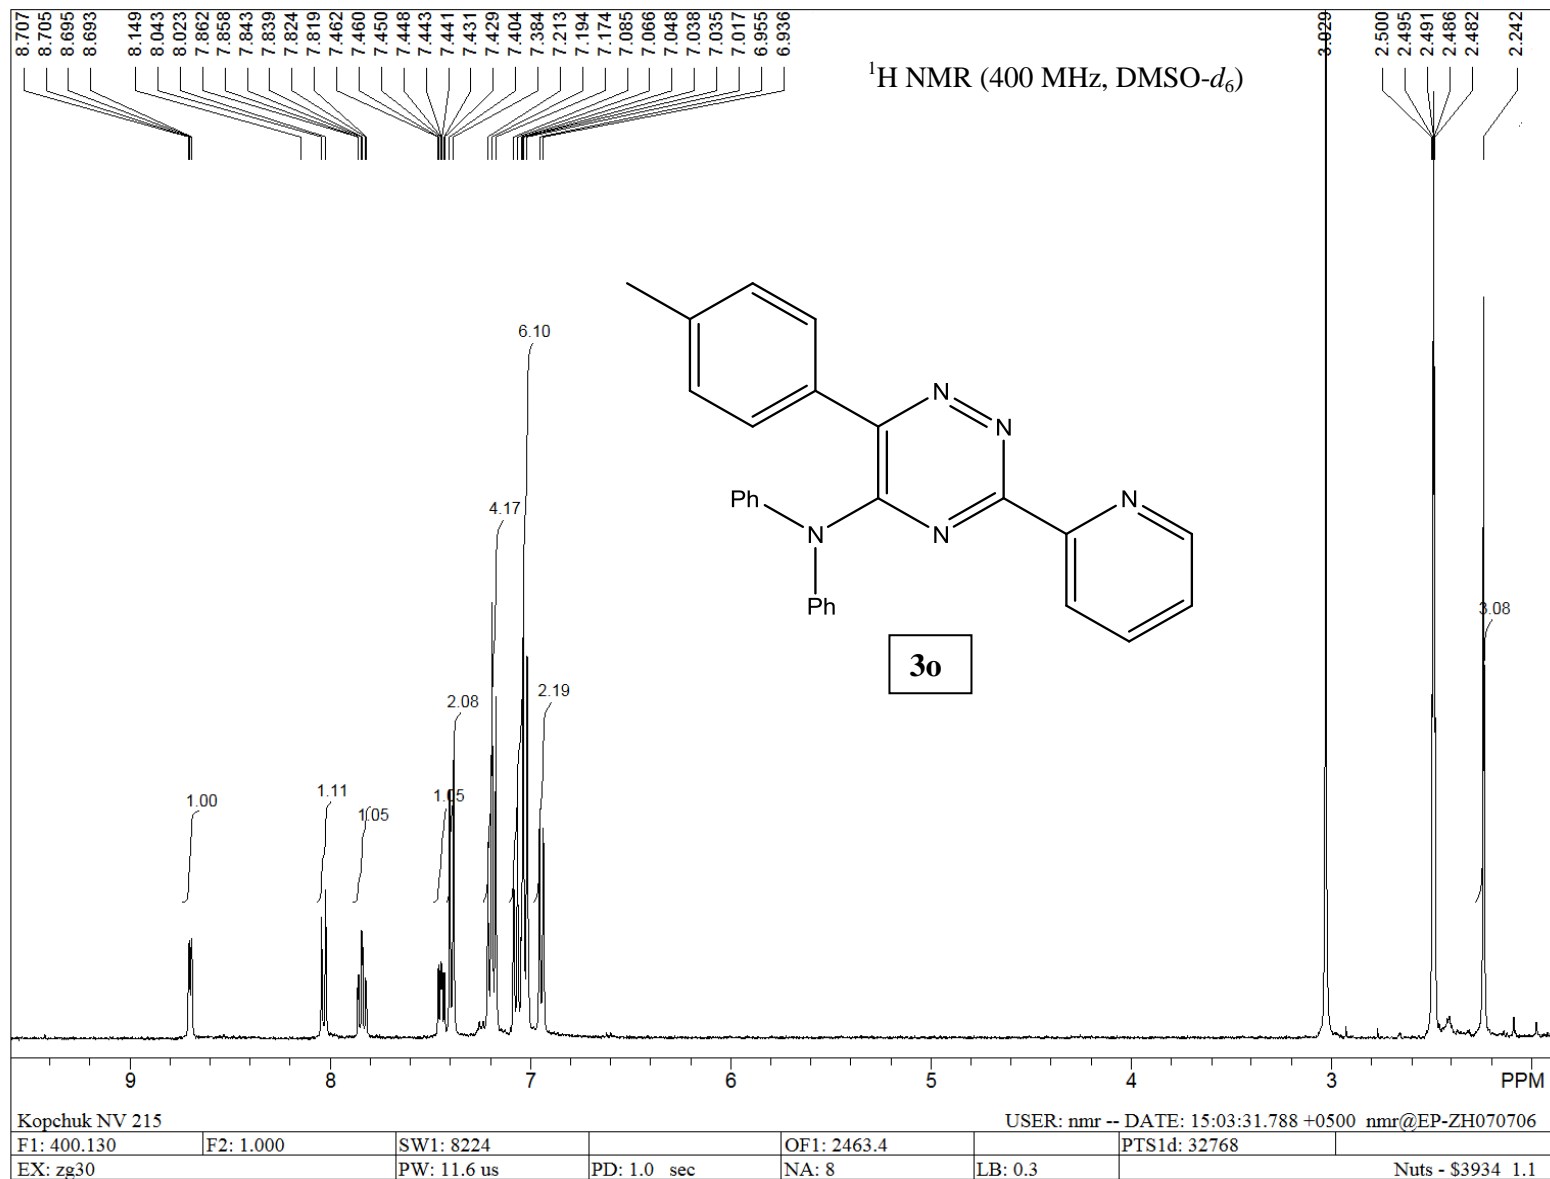

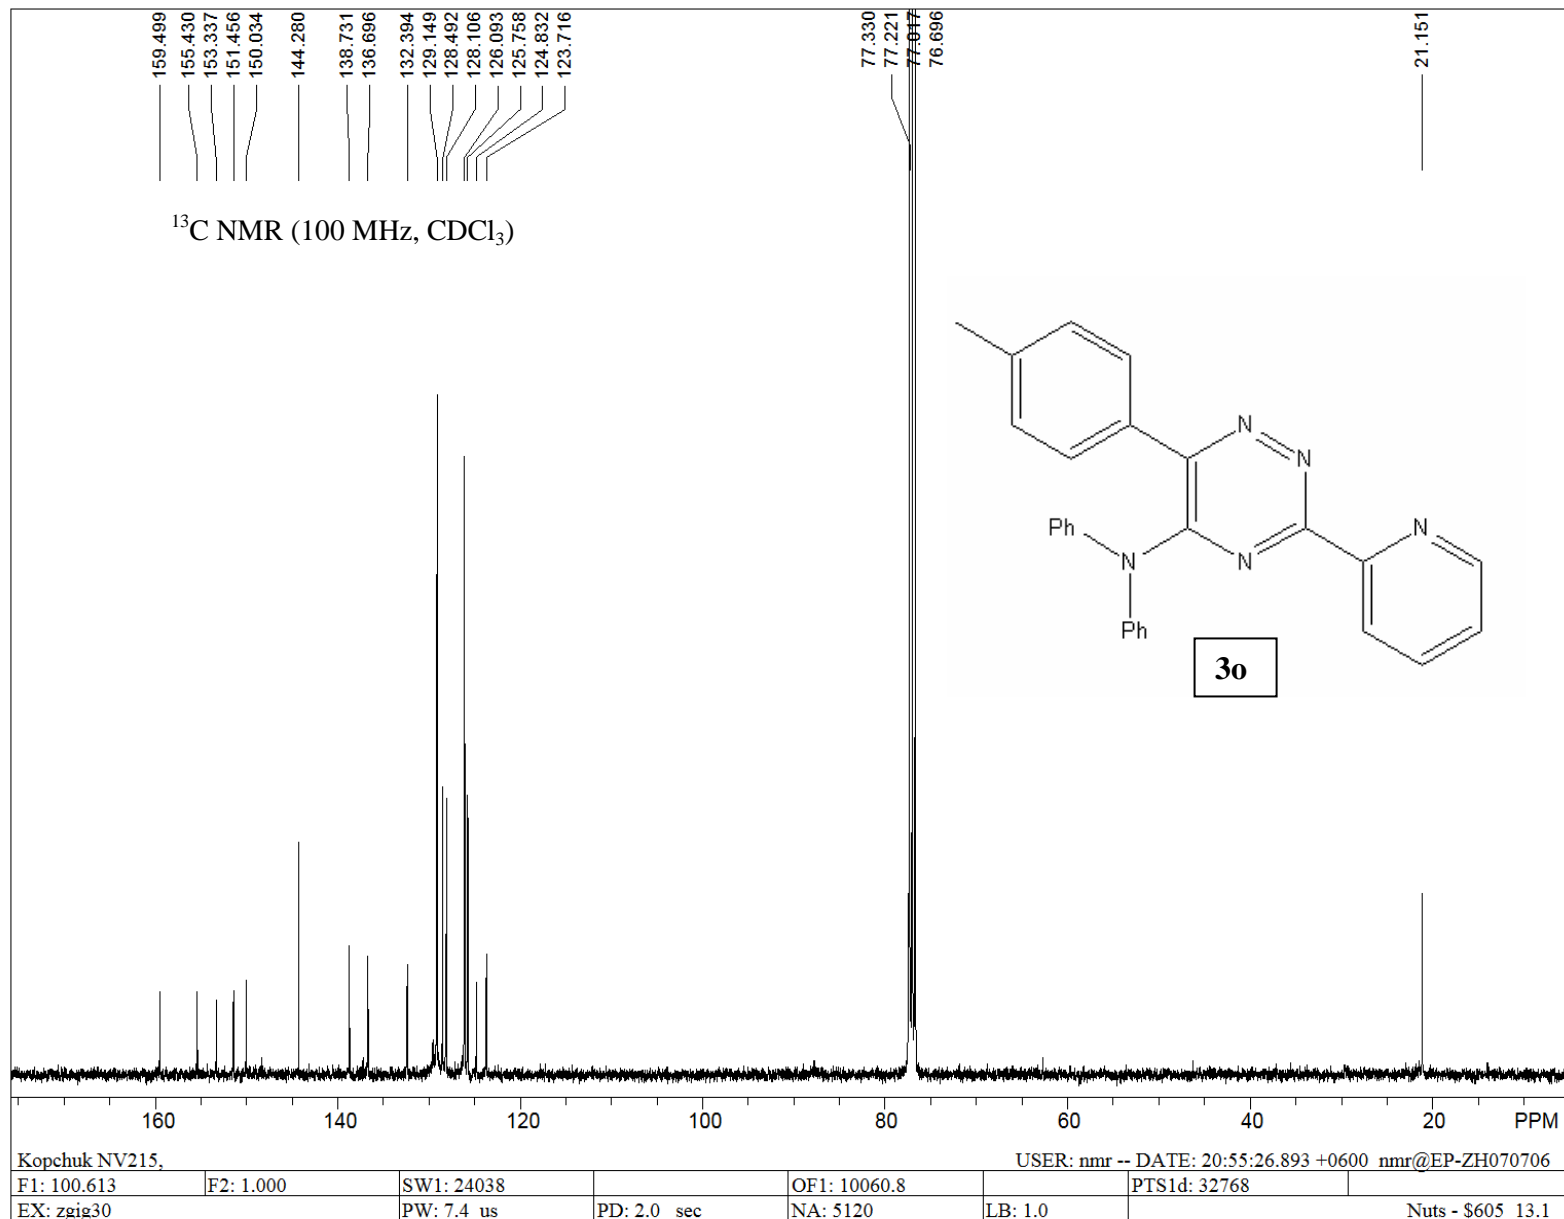

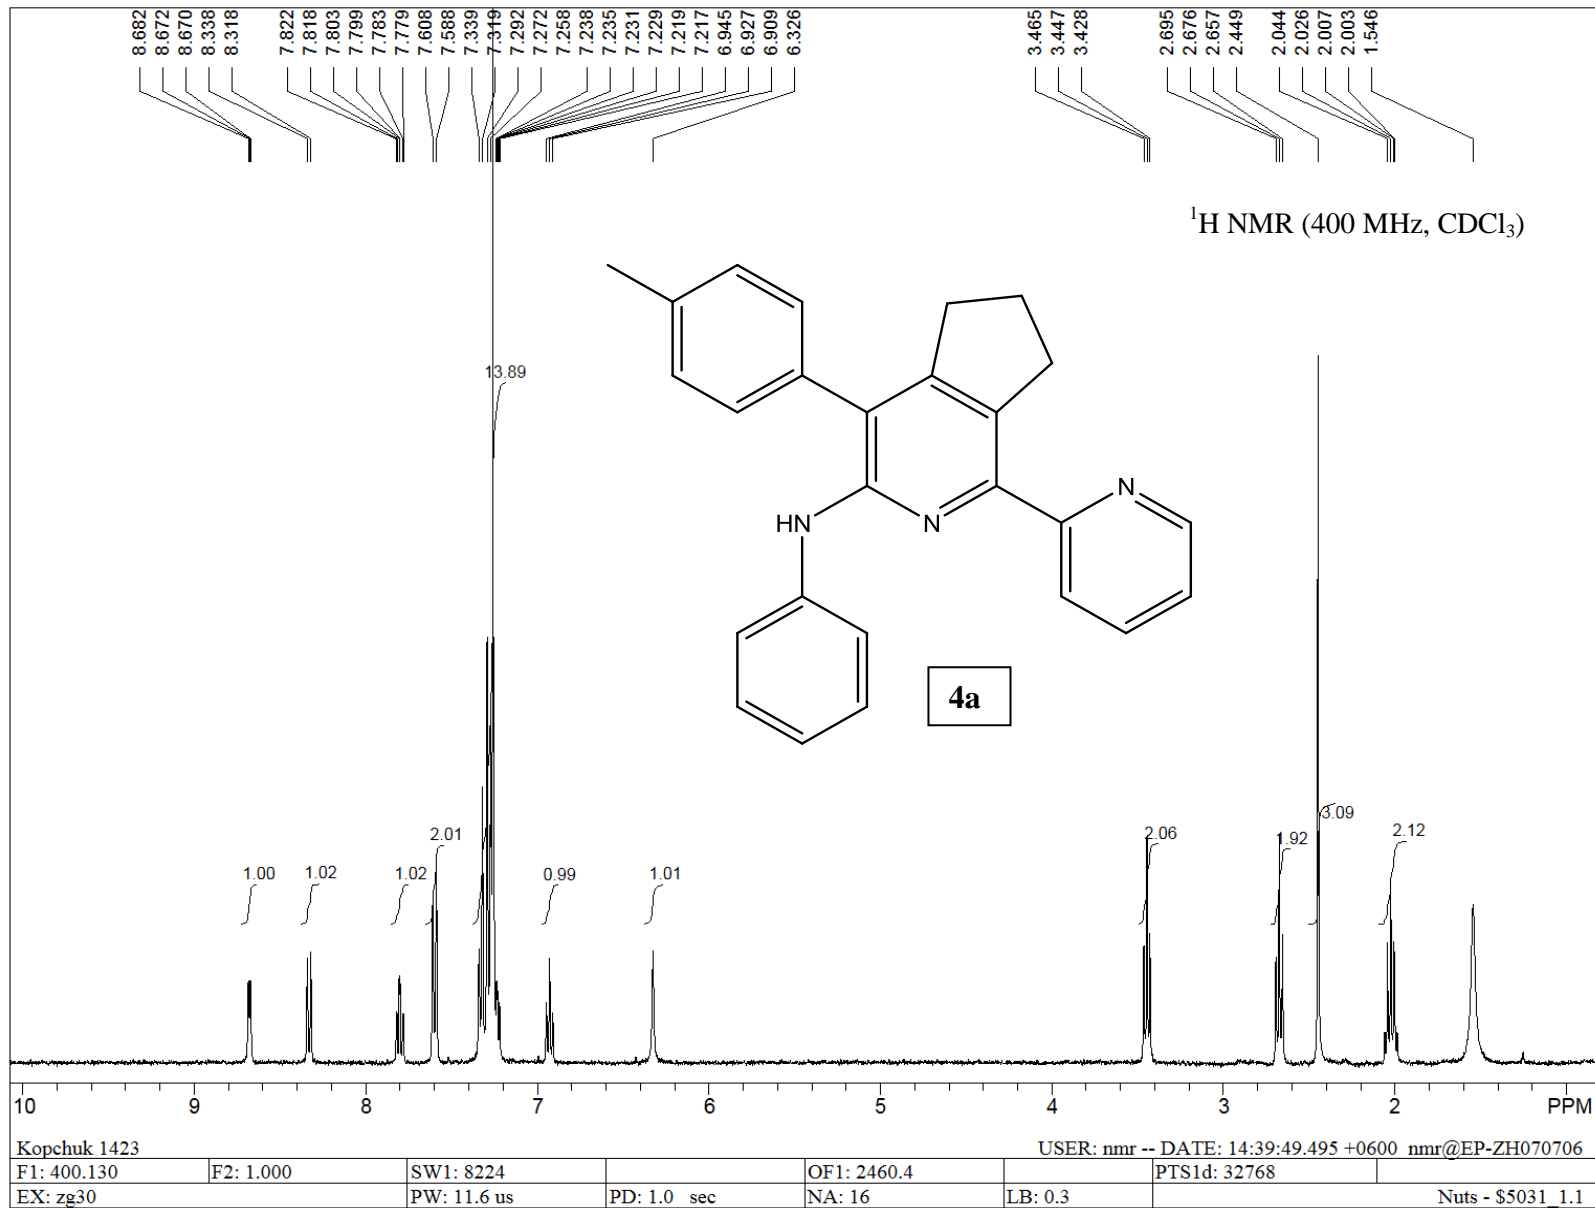

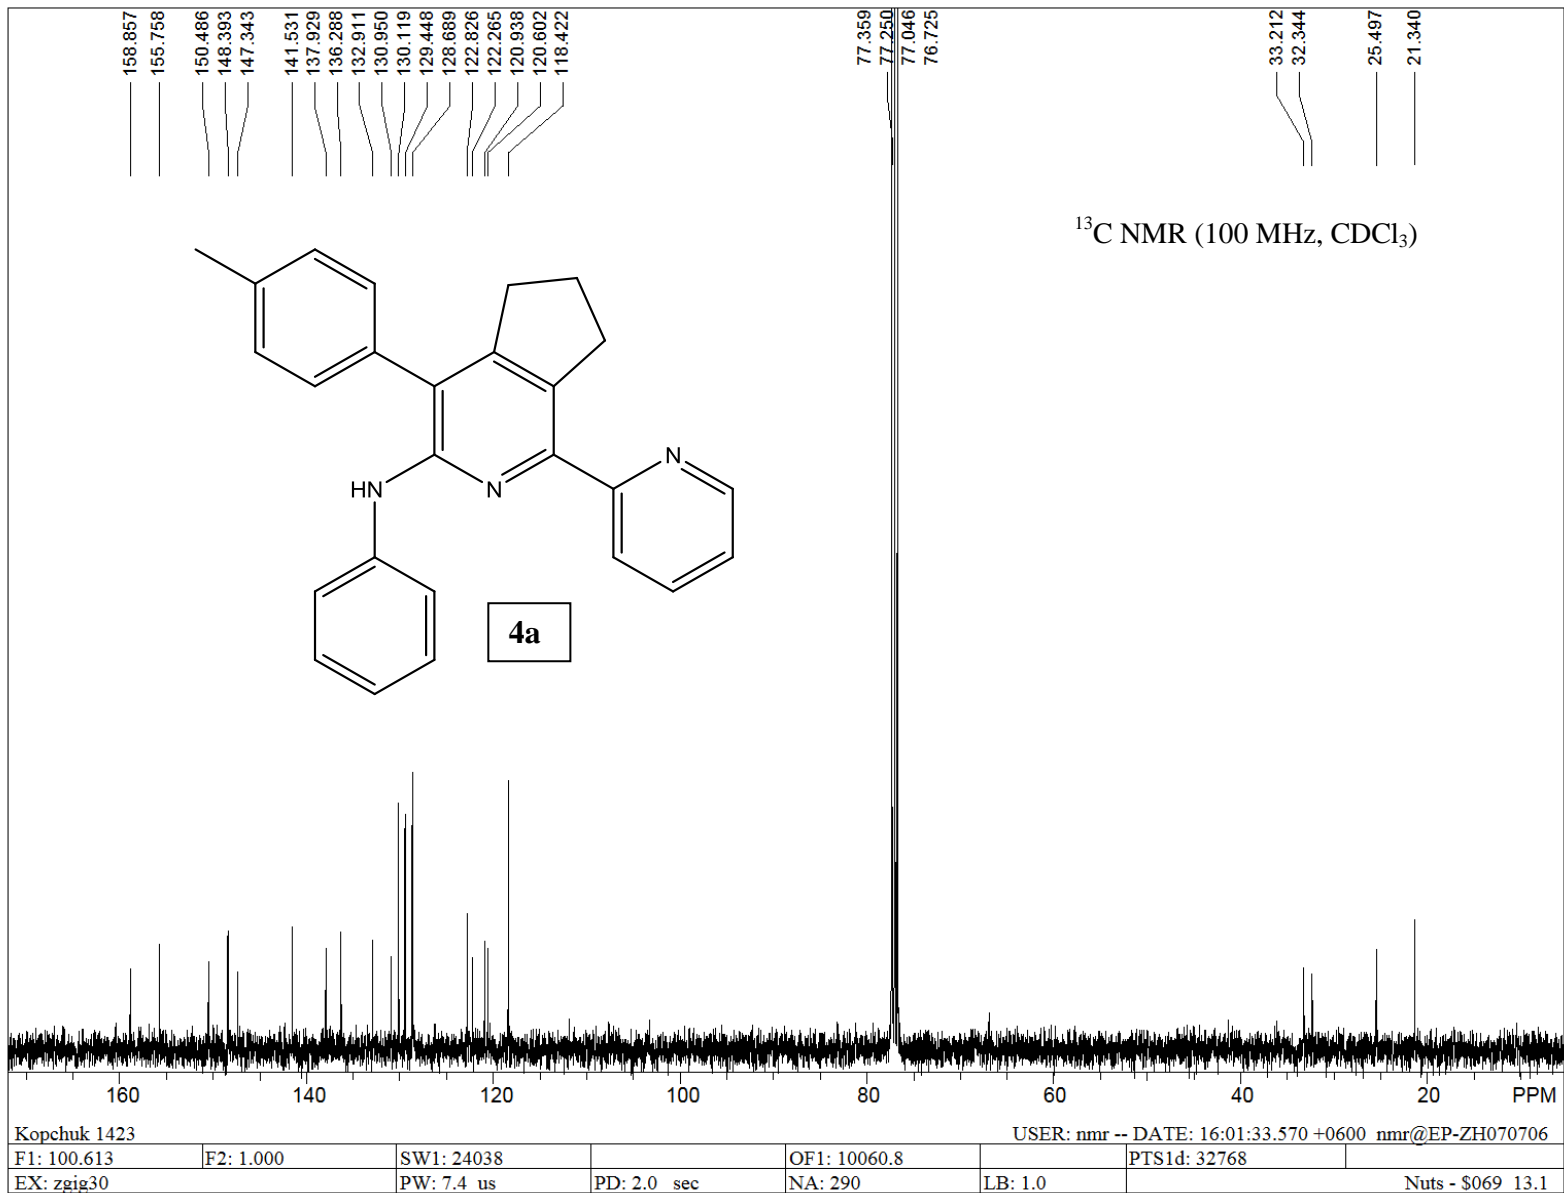

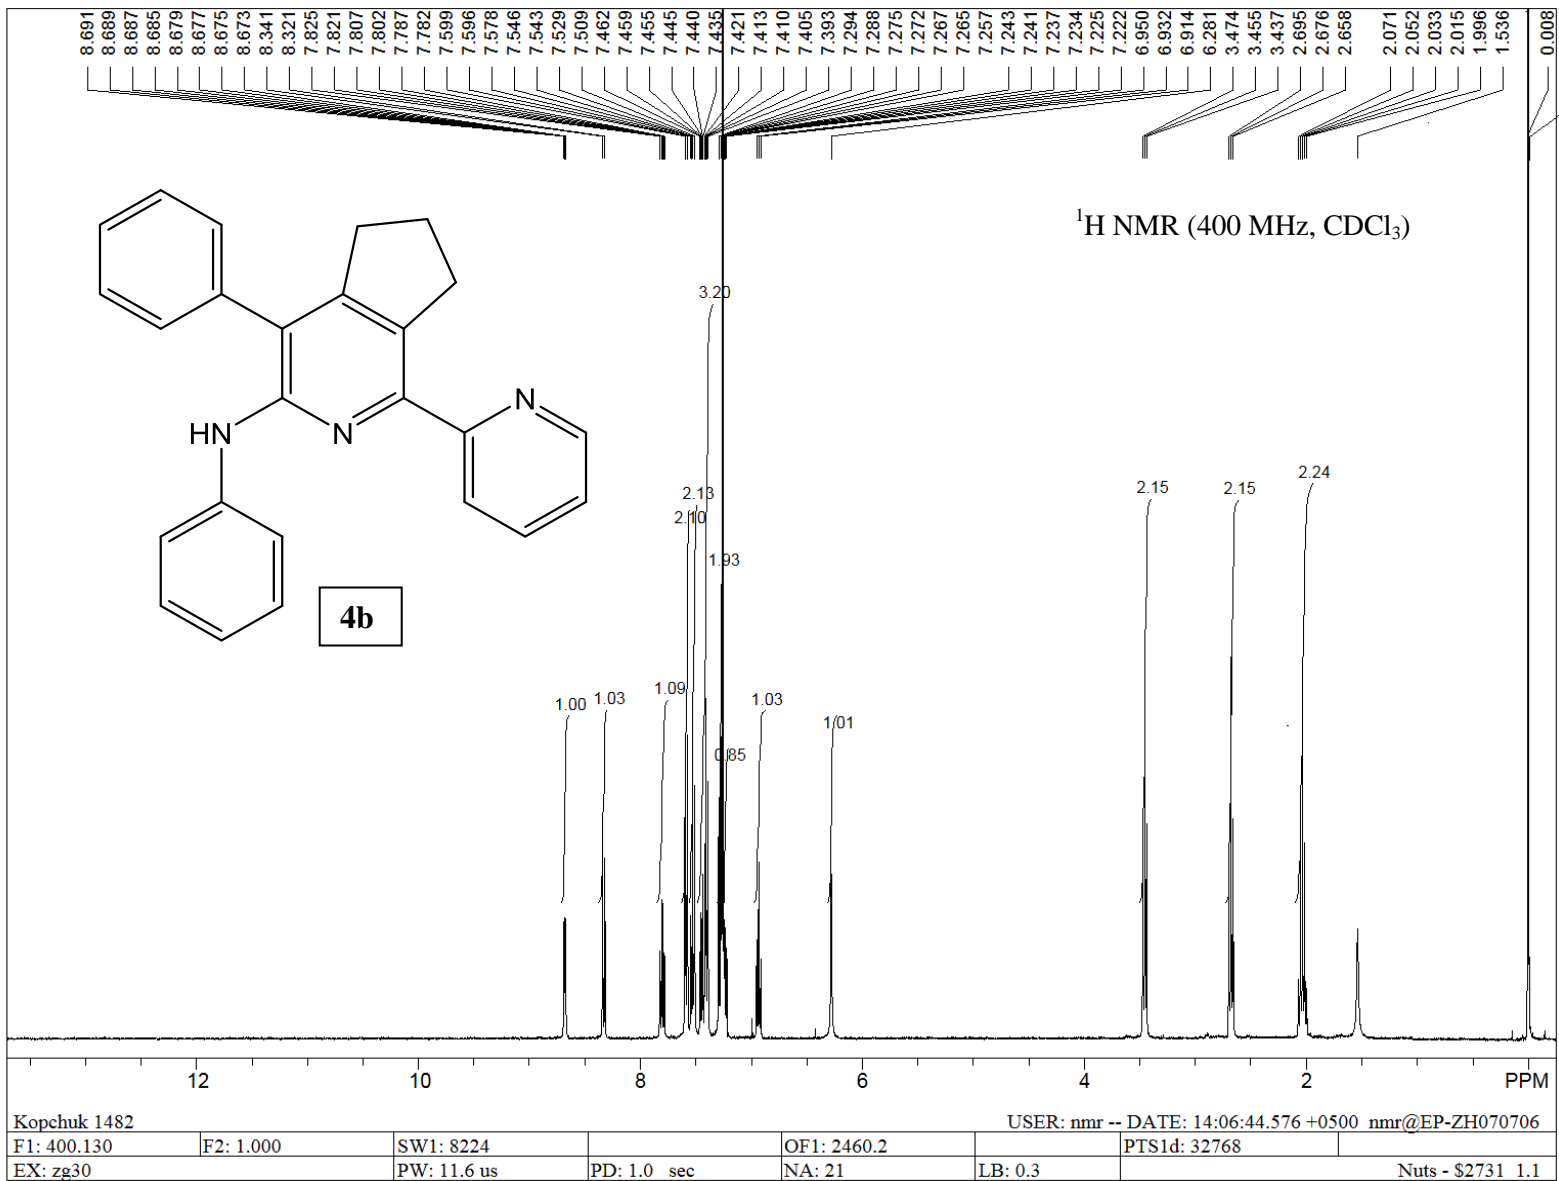

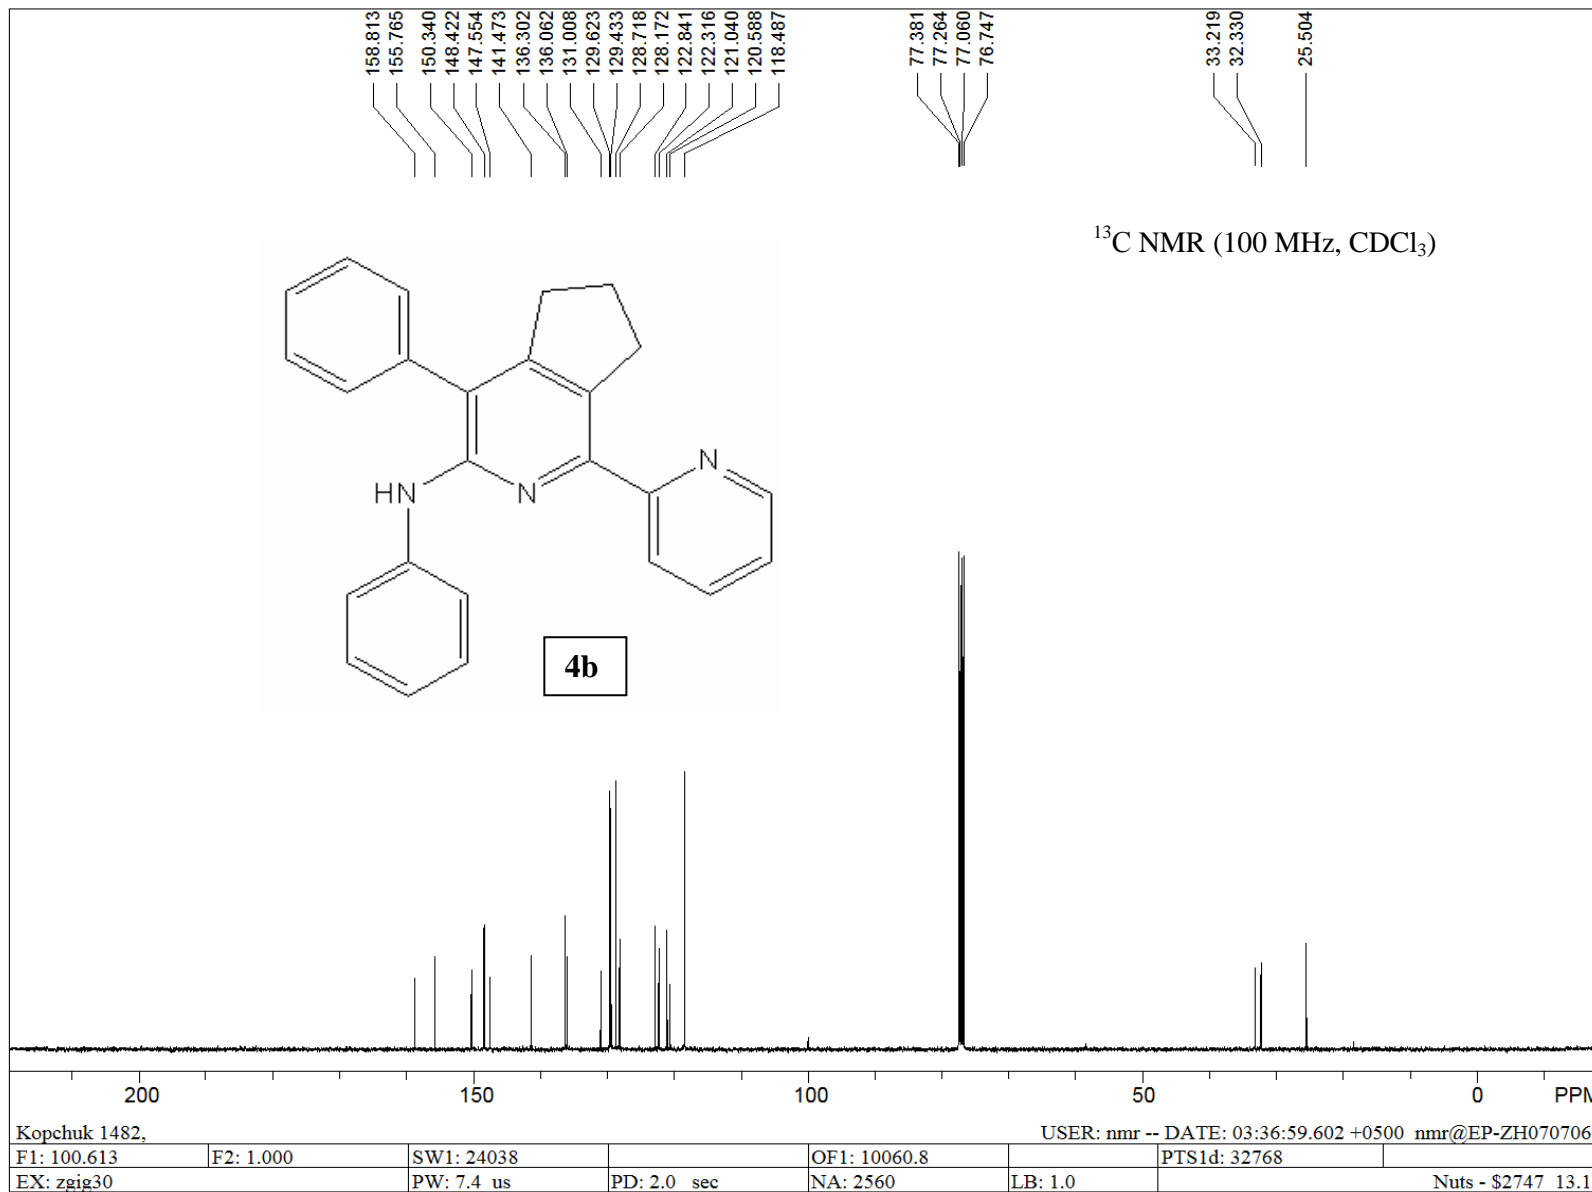



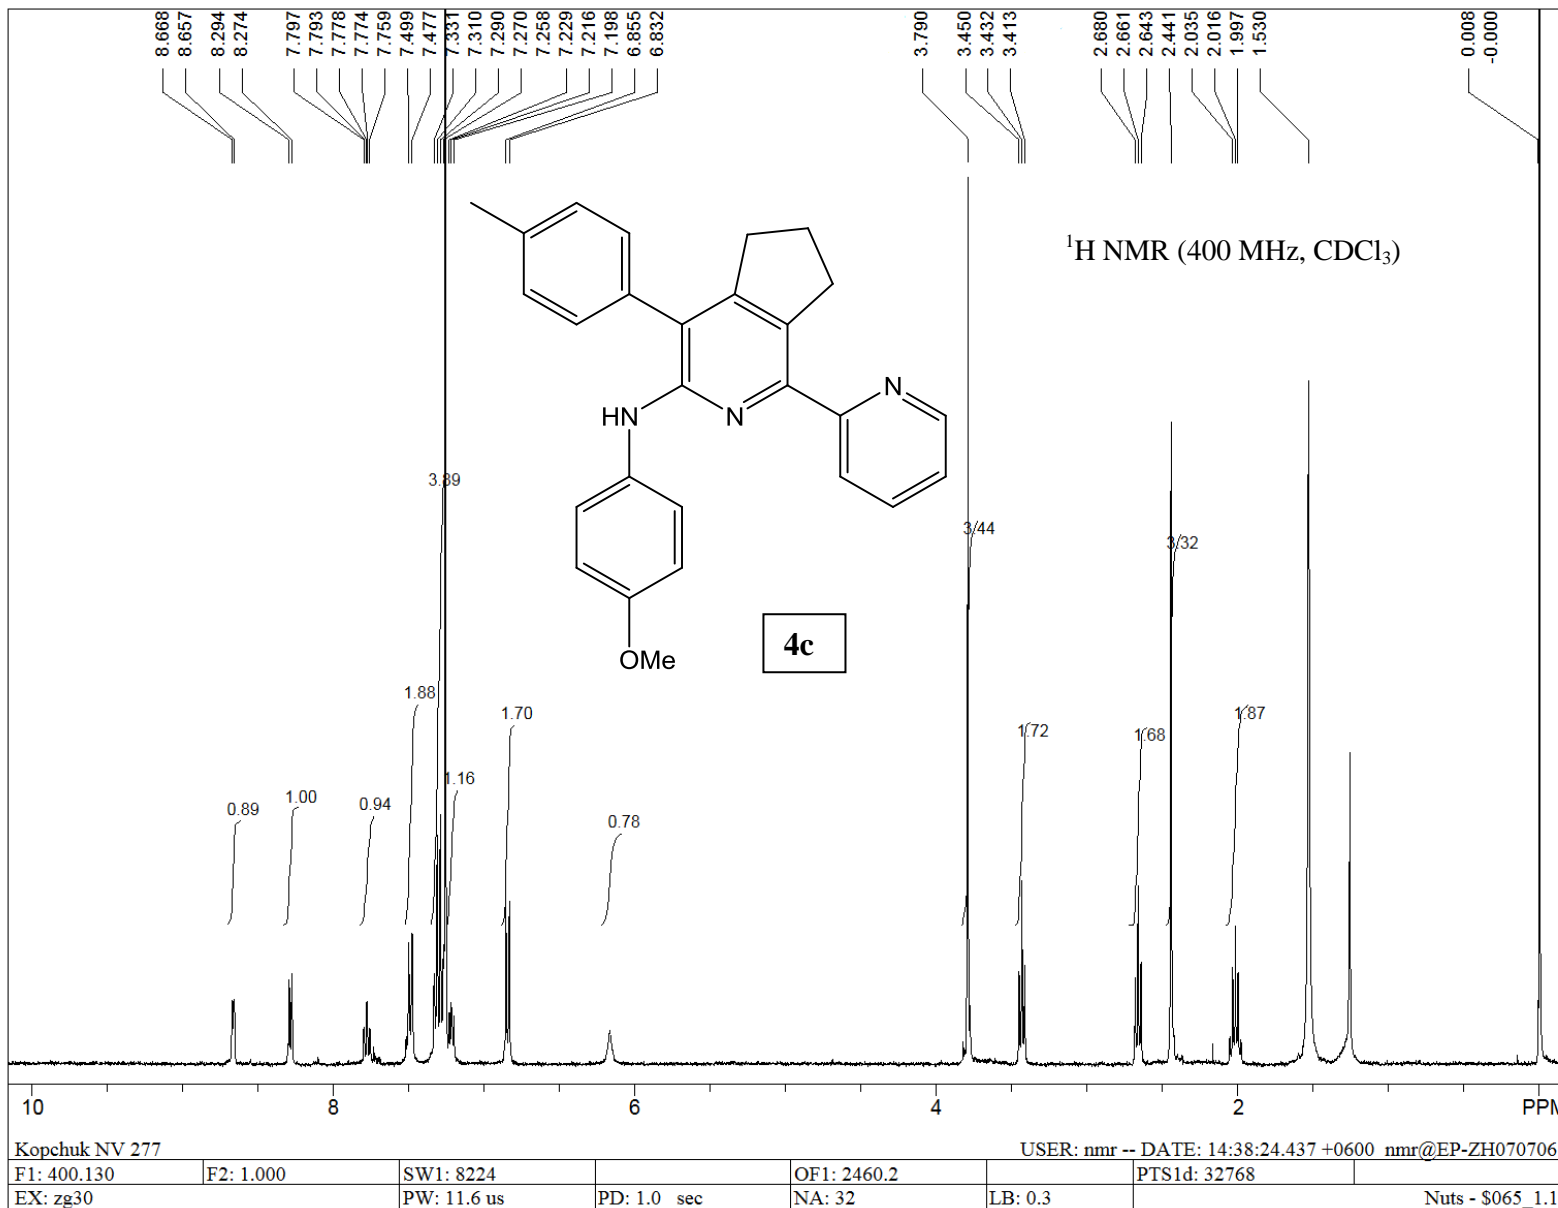

Supplement: c6ra26305d1.pdf [file c6ra26305d1.pdf]
